# Supplementary material for: Interactions of a multifunctional di-triazole derivative with Alzheimer's Aβ42monomer and Aβ42protofibril: a systematic molecular dynamics study
Source: Royal Society of Chemistry journal article supplement (doi:10.1039/c9cp04775a), 2019-12-13
Supplement: c9cp04775a1.pdf [file c9cp04775a1.pdf]

## Supporting Information

### Interactions of a multifunctional di-triazole derivative with Alzheimer's A $\beta$ <sub>42</sub> monomer and A $\beta$ <sub>42</sub> protofibril: A systematic molecular dynamics study

Anupamjeet Kaur,<sup>[a]</sup> Suniba Shuaib,<sup>[a]</sup> Deepti Goyal,<sup>\*[a]</sup> and Bhupesh Goyal<sup>\*[b]</sup>

[a] *Anupamjeet Kaur, Suniba Shuaib, Dr. Deepti Goyal*  
Department of Chemistry, Faculty of Basic and Applied Sciences, Sri Guru Granth  
Sahib World University, Fatehgarh Sahib–140406, Punjab, India.

[b] *Dr. Bhupesh Goyal*  
School of Chemistry & Biochemistry, Thapar Institute of Engineering & Technology,  
Patiala–147004, Punjab, India

\*Corresponding authors

E-mail address: [bhupesh@iitbombay.org](mailto:bhupesh@iitbombay.org); [deeptig@iitbombay.org](mailto:deeptig@iitbombay.org)

## Table of contents

|                                                                                                                                                                                                                                                                                                                                                                                                                                                                                                                                                                                                                                                                                                                                                                                                                                                                               |     |
|-------------------------------------------------------------------------------------------------------------------------------------------------------------------------------------------------------------------------------------------------------------------------------------------------------------------------------------------------------------------------------------------------------------------------------------------------------------------------------------------------------------------------------------------------------------------------------------------------------------------------------------------------------------------------------------------------------------------------------------------------------------------------------------------------------------------------------------------------------------------------------|-----|
| <b>Fig. S1:</b> The docked complex of <b>6n</b> with A $\beta$ <sub>42</sub> monomer (PDB: 1Z0Q) highlighting the best-docked conformation is shown in panel a. The A $\beta$ <sub>42</sub> structure is shown in the cartoon representation and <b>6n</b> is shown in the stick representation. The docked complex of <b>6n</b> with A $\beta$ <sub>42</sub> fibril (PDB: 2BEG) is shown in panel b. The hydrogen bonds are represented as yellow dashed lines. The 2D interaction maps displaying the hydrophobic contacts of <b>6n</b> with A $\beta$ <sub>42</sub> monomer and A $\beta$ <sub>42</sub> protofibril are shown in panel c, and d, respectively. The maps were generated using LigPlot+ software. The green dashed lines depict the hydrogen bonds between A $\beta$ <sub>42</sub> monomer- <b>6n</b> , and A $\beta$ <sub>42</sub> protofibril- <b>6n</b> . | S3  |
| <b>Fig. S2:</b> The root-mean-square deviation (RMSD) and root-mean-square fluctuation (RMSF) for A $\beta$ <sub>42</sub> monomer and A $\beta$ <sub>42</sub> monomer- <b>6n</b> complex are shown in panel a, and b, respectively. The RMSD and RMSF for A $\beta$ <sub>42</sub> protofibril and A $\beta$ <sub>42</sub> protofibril- <b>6n</b> complex are shown in panel c, and d, respectively.                                                                                                                                                                                                                                                                                                                                                                                                                                                                           | S4  |
| <b>Fig. S3:</b> The RMSD of triplicate simulations for A $\beta$ <sub>42</sub> monomer, A $\beta$ <sub>42</sub> monomer- <b>6n</b> complex, A $\beta$ <sub>42</sub> protofibril, A $\beta$ <sub>42</sub> protofibril- <b>6n</b> complex are shown in panel (a-d), respectively.                                                                                                                                                                                                                                                                                                                                                                                                                                                                                                                                                                                               | S5  |
| <b>Fig. S4:</b> The RMSD of the five chains, A-E, of A $\beta$ <sub>42</sub> protofibril and A $\beta$ <sub>42</sub> protofibril- <b>6n</b> complex is shown in panel a, and b, respectively.                                                                                                                                                                                                                                                                                                                                                                                                                                                                                                                                                                                                                                                                                 | S6  |
| <b>Fig. S5:</b> The number of hydrogen bonds between A $\beta$ <sub>42</sub> protofibril chains D-E for A $\beta$ <sub>42</sub> protofibril (black) and A $\beta$ <sub>42</sub> protofibril- <b>6n</b> complex (magenta) during simulation is shown in panel a.                                                                                                                                                                                                                                                                                                                                                                                                                                                                                                                                                                                                               | S7  |
| <b>Fig. S6:</b> The residue-residue contact maps between A $\beta$ <sub>42</sub> protofibril chains D-E for A $\beta$ <sub>42</sub> protofibril and A $\beta$ <sub>42</sub> protofibril- <b>6n</b> complex are shown in panel b, and c, respectively. The cut-off distance between atoms used to define contact is 1.5 nm.                                                                                                                                                                                                                                                                                                                                                                                                                                                                                                                                                    | S8  |
| <b>Table S1:</b> The secondary structure component statistics of A $\beta$ <sub>42</sub> monomer, A $\beta$ <sub>42</sub> monomer- <b>6n</b> complex, A $\beta$ <sub>42</sub> protofibril, and A $\beta$ <sub>42</sub> protofibril- <b>6n</b> complex for triplicate simulations.                                                                                                                                                                                                                                                                                                                                                                                                                                                                                                                                                                                             | S9  |
| Coordinates of the representative structures from cluster analysis for A $\beta$ <sub>42</sub> monomer, A $\beta$ <sub>42</sub> monomer- <b>6n</b> complex, A $\beta$ <sub>42</sub> protofibril, and A $\beta$ <sub>42</sub> protofibril- <b>6n</b> complex.                                                                                                                                                                                                                                                                                                                                                                                                                                                                                                                                                                                                                  | S10 |

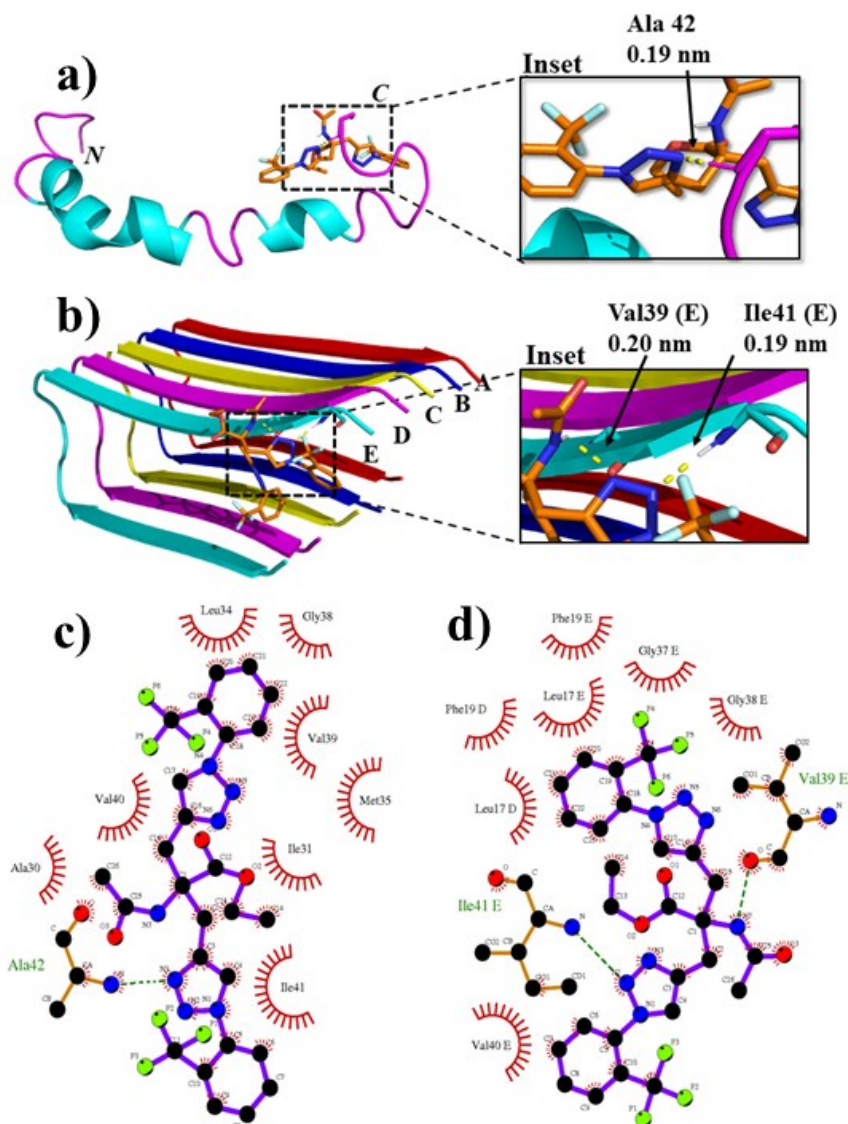

**Fig. S1:** The docked complex of **6n** with  $A\beta_{42}$  monomer (PDB: 1Z0Q) highlighting the best-docked conformation is shown in panel a. The  $A\beta_{42}$  structure is shown in the cartoon representation and **6n** is shown in the stick representation. The docked complex of **6n** with  $A\beta_{42}$  fibril (PDB: 2BEG) is shown in panel b. The hydrogen bonds are represented as yellow dashed lines. The 2D interaction maps displaying the hydrophobic contacts of **6n** with  $A\beta_{42}$  monomer and  $A\beta_{42}$  protofibril are shown in panel c, and d, respectively. The maps were generated using LigPlot+ software. The green dashed lines depict the hydrogen bonds between  $A\beta_{42}$  monomer–**6n**, and  $A\beta_{42}$  protofibril–**6n**.<sup>1</sup>

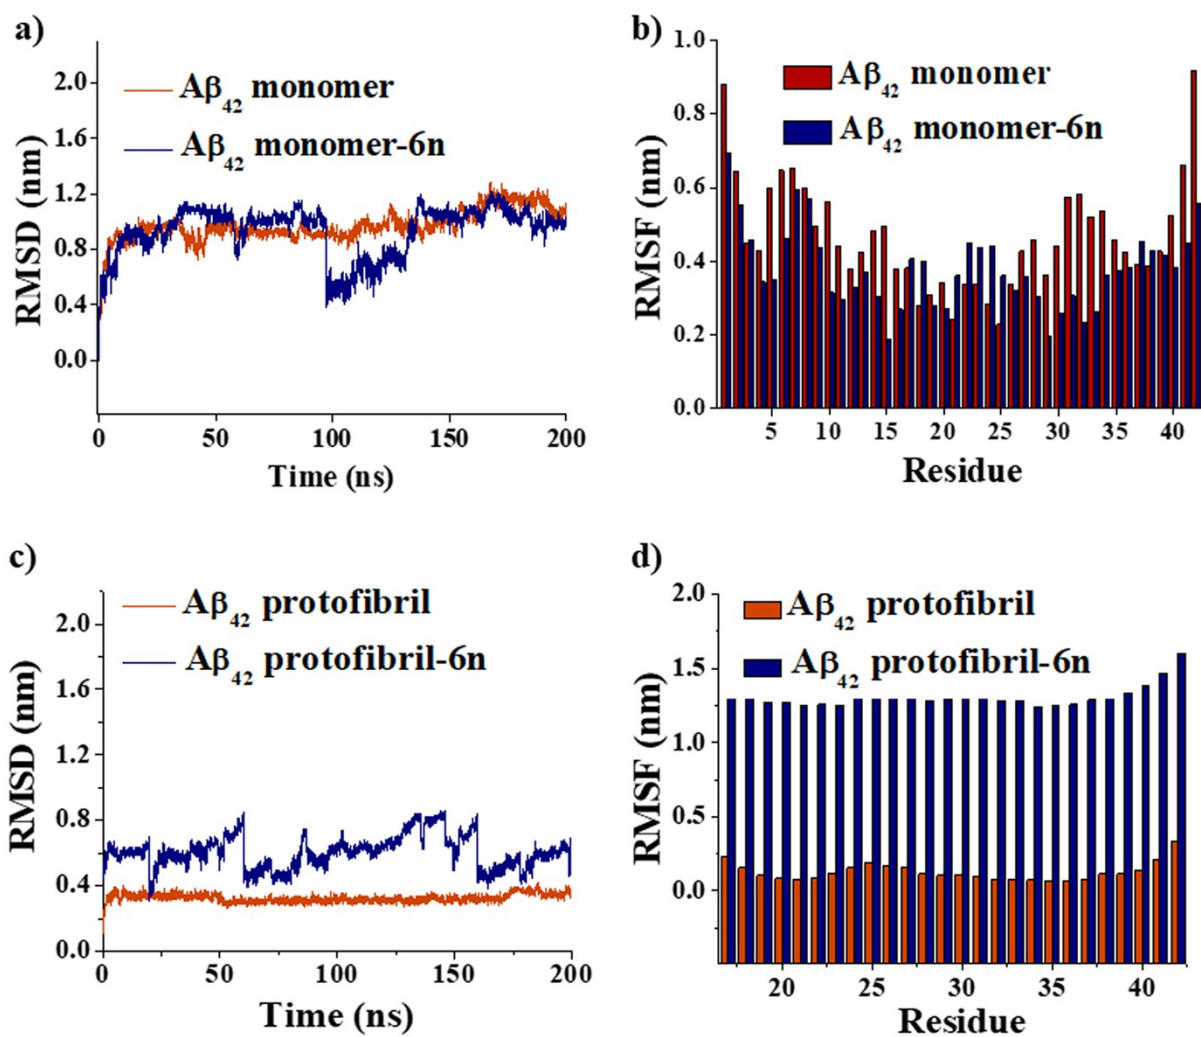

**Fig. S2:** The root-mean-square deviation (RMSD) and root-mean-square fluctuation (RMSF) for Aβ<sub>42</sub> monomer and Aβ<sub>42</sub> monomer-6n complex are shown in panel a, and b, respectively. The RMSD and RMSF for Aβ<sub>42</sub> protofibril and Aβ<sub>42</sub> protofibril-6n complex are shown in panel c, and d, respectively.

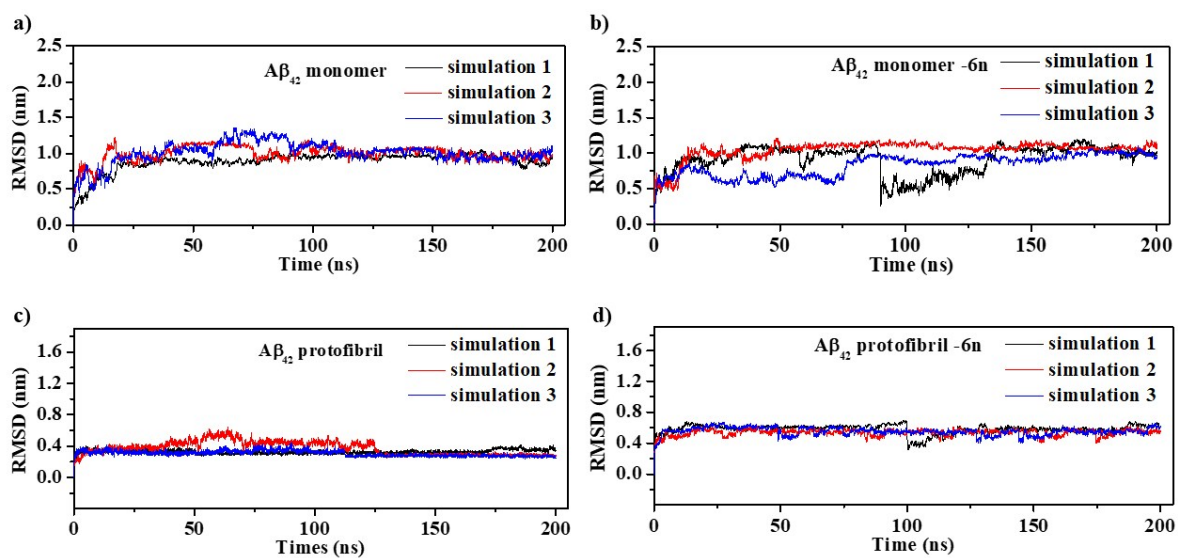

**Fig. S3:** The RMSD of triplicate simulations for  $A\beta_{42}$  monomer,  $A\beta_{42}$  monomer-6n complex,  $A\beta_{42}$  protofibril,  $A\beta_{42}$  protofibril-6n complex are shown in panel (a-d), respectively.

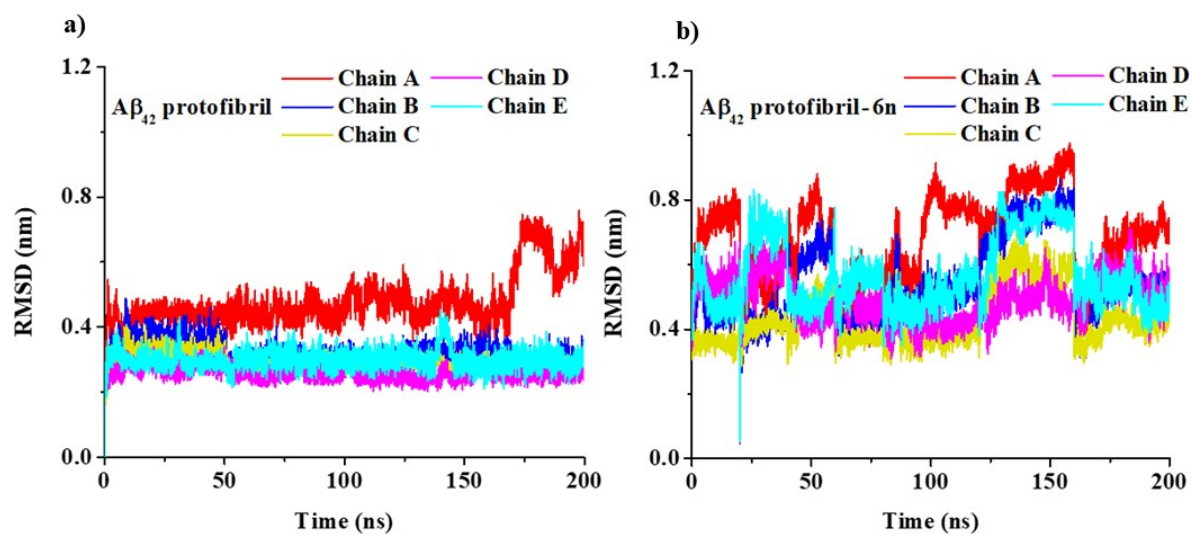

**Fig. S4:** The RMSD of the five chains, A–E, of Aβ<sub>42</sub> protofibril and Aβ<sub>42</sub> protofibril-6n complex is shown in panel a, and b, respectively.

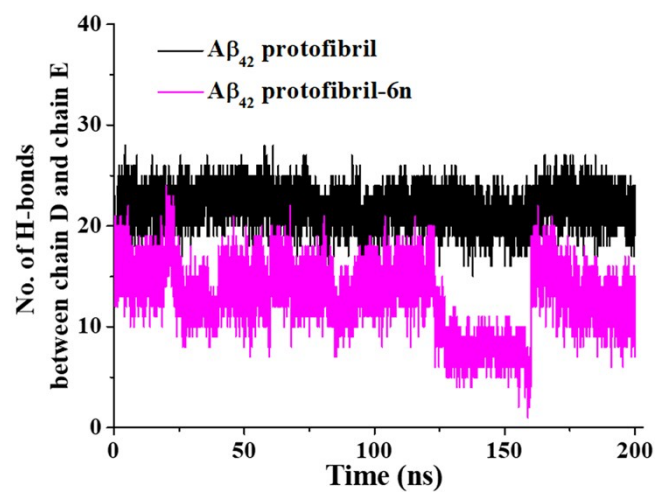

**Fig. S5:** The number of hydrogen bonds between Aβ<sub>42</sub> protofibril chains D–E for Aβ<sub>42</sub> protofibril (black) and Aβ<sub>42</sub> protofibril–6n complex (magenta) is shown during simulation.

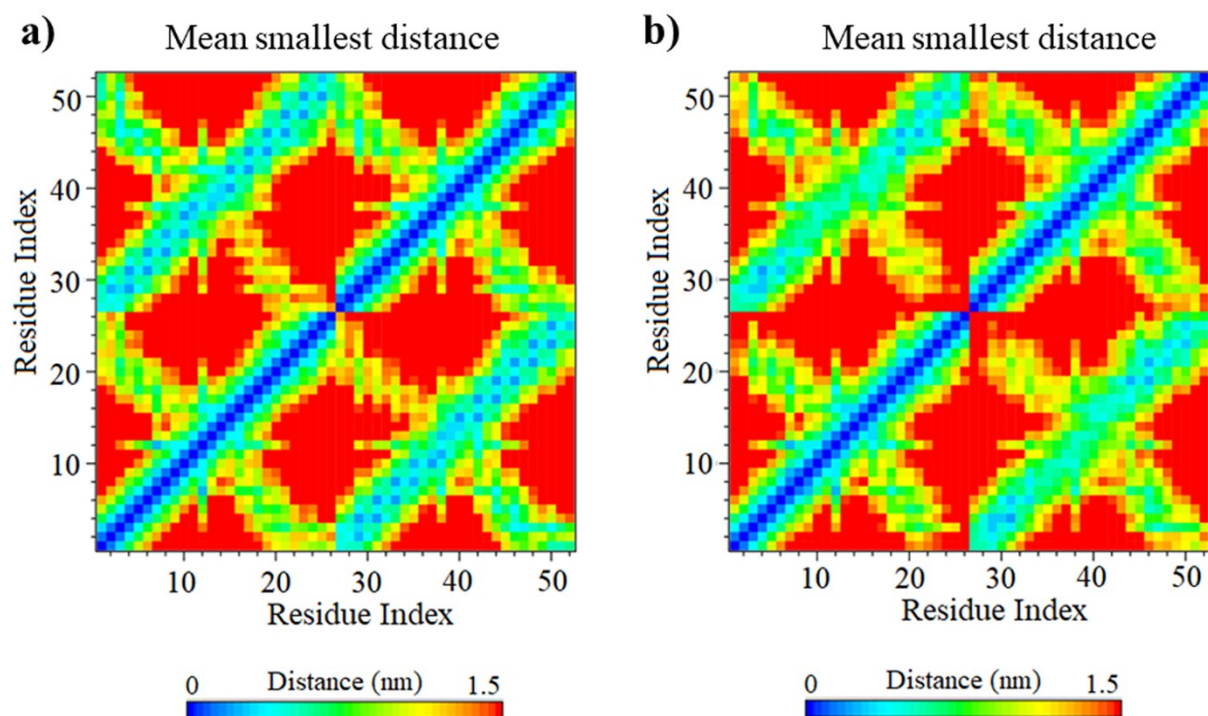

**Fig. S6:** The residue–residue contact maps between  $A\beta_{42}$  protofibril chains D–E for  $A\beta_{42}$  protofibril and  $A\beta_{42}$  protofibril–**6n** complex are shown in panel a, and b, respectively. The cut–off distance between atoms used to define contact is 1.5 nm.



**Table S1:** The secondary structure component statistics of A $\beta$ <sub>42</sub> monomer, A $\beta$ <sub>42</sub> monomer-**6n** complex, A $\beta$ <sub>42</sub> protofibril, and A $\beta$ <sub>42</sub> protofibril-**6n** complex for triplicate simulations.

| Model system                                   | Simulation | Secondary structure component (%) |                             |      |      |      |                 |
|------------------------------------------------|------------|-----------------------------------|-----------------------------|------|------|------|-----------------|
|                                                |            | Helix <sup>a</sup>                | $\beta$ -sheet <sup>b</sup> | Coil | Bend | Turn | Chain-separator |
| A $\beta$ <sub>42</sub> monomer                | 1          | 46                                | 4                           | 29   | 13   | 8    | 0               |
|                                                | 2          | 40                                | 4                           | 32   | 17   | 6    | 0               |
|                                                | 3          | 38                                | 4                           | 33   | 17   | 7    | 0               |
| A $\beta$ <sub>42</sub> monomer- <b>6n</b>     | 1          | 53                                | 0                           | 25   | 11   | 11   | 0               |
|                                                | 2          | 42                                | 0                           | 28   | 14   | 16   | 0               |
|                                                | 3          | 45                                | 0                           | 23   | 8    | 24   | 0               |
| A $\beta$ <sub>42</sub> protofibril            | 1          | 0                                 | 69                          | 20   | 8    | 0    | 3               |
|                                                | 2          | 0                                 | 69                          | 22   | 6    | 0    | 3               |
|                                                | 3          | 0                                 | 74                          | 18   | 5    | 0    | 3               |
| A $\beta$ <sub>42</sub> protofibril- <b>6n</b> | 1          | 0                                 | 46                          | 38   | 10   | 3    | 3               |
|                                                | 2          | 0                                 | 42                          | 38   | 12   | 5    | 3               |
|                                                | 3          | 0                                 | 44                          | 37   | 12   | 4    | 3               |

<sup>a</sup>Helix =  $\alpha$ -helix +  $\pi$ -helix + 3<sub>10</sub>-helix; <sup>b</sup> $\beta$ -sheet =  $\beta$ -strand +  $\beta$ -bridge

Coordinates of the representative structures from cluster analysis for A $\beta$ <sub>42</sub> monomer, A $\beta$ <sub>42</sub> monomer-6n complex, A $\beta$ <sub>42</sub> protofibril, and A $\beta$ <sub>42</sub> protofibril-6n complex.

1. A $\beta$ <sub>42</sub> monomer

|      |    |      |     |   |         |        |        |      |      |     |
|------|----|------|-----|---|---------|--------|--------|------|------|-----|
| ATOM | 1  | N    | ASP | 1 | -12.530 | -7.438 | 8.267  | 1.00 | 0.00 | N   |
| ATOM | 2  | CA   | ASP | 1 | -11.340 | -6.944 | 7.555  | 1.00 | 0.00 | C   |
| ATOM | 3  | C    | ASP | 1 | -11.510 | -6.506 | 6.104  | 1.00 | 0.00 | C   |
| ATOM | 4  | O    | ASP | 1 | -12.251 | -7.139 | 5.347  | 1.00 | 0.00 | O   |
| ATOM | 5  | CB   | ASP | 1 | -10.207 | -7.976 | 7.649  | 1.00 | 0.00 | C   |
| ATOM | 6  | CG   | ASP | 1 | -8.807  | -7.385 | 7.503  | 1.00 | 0.00 | C   |
| ATOM | 7  | OD1  | ASP | 1 | -8.096  | -7.688 | 6.512  | 1.00 | 0.00 | O   |
| ATOM | 8  | OD2  | ASP | 1 | -8.617  | -6.389 | 8.221  | 1.00 | 0.00 | O1- |
| ATOM | 9  | H1   | ASP | 1 | -13.159 | -6.668 | 8.350  | 1.00 | 0.00 | H   |
| ATOM | 10 | H2   | ASP | 1 | -12.914 | -8.225 | 7.792  | 1.00 | 0.00 | H   |
| ATOM | 11 | H3   | ASP | 1 | -12.370 | -7.708 | 9.215  | 1.00 | 0.00 | H   |
| ATOM | 12 | N    | ALA | 2 | -10.709 | -5.547 | 5.636  | 1.00 | 0.00 | N   |
| ATOM | 13 | CA   | ALA | 2 | -10.726 | -5.029 | 4.257  | 1.00 | 0.00 | C   |
| ATOM | 14 | C    | ALA | 2 | -9.383  | -4.990 | 3.517  | 1.00 | 0.00 | C   |
| ATOM | 15 | O    | ALA | 2 | -8.303  | -4.991 | 4.101  | 1.00 | 0.00 | O   |
| ATOM | 16 | CB   | ALA | 2 | -11.189 | -3.576 | 4.395  | 1.00 | 0.00 | C   |
| ATOM | 17 | H    | ALA | 2 | -10.006 | -5.152 | 6.218  | 1.00 | 0.00 | H   |
| ATOM | 18 | N    | GLU | 3 | -9.426  | -5.341 | 2.229  | 1.00 | 0.00 | N   |
| ATOM | 19 | CA   | GLU | 3 | -8.205  | -5.252 | 1.430  | 1.00 | 0.00 | C   |
| ATOM | 20 | C    | GLU | 3 | -8.130  | -3.961 | 0.608  | 1.00 | 0.00 | C   |
| ATOM | 21 | O    | GLU | 3 | -8.717  | -3.854 | -0.473 | 1.00 | 0.00 | O   |
| ATOM | 22 | CB   | GLU | 3 | -8.119  | -6.476 | 0.505  | 1.00 | 0.00 | C   |
| ATOM | 23 | CG   | GLU | 3 | -6.665  | -6.879 | 0.251  | 1.00 | 0.00 | C   |
| ATOM | 24 | CD   | GLU | 3 | -5.814  | -5.991 | -0.658 | 1.00 | 0.00 | C   |
| ATOM | 25 | OE1  | GLU | 3 | -5.175  | -5.060 | -0.124 | 1.00 | 0.00 | O   |
| ATOM | 26 | OE2  | GLU | 3 | -5.936  | -6.014 | -1.901 | 1.00 | 0.00 | O1- |
| ATOM | 27 | H    | GLU | 3 | -10.215 | -5.735 | 1.767  | 1.00 | 0.00 | H   |
| ATOM | 28 | N    | PHE | 4 | -7.291  | -3.016 | 1.028  | 1.00 | 0.00 | N   |
| ATOM | 29 | CA   | PHE | 4 | -7.239  | -1.676 | 0.434  | 1.00 | 0.00 | C   |
| ATOM | 30 | C    | PHE | 4 | -7.022  | -1.508 | -1.073 | 1.00 | 0.00 | C   |
| ATOM | 31 | O    | PHE | 4 | -7.488  | -0.583 | -1.731 | 1.00 | 0.00 | O   |
| ATOM | 32 | CB   | PHE | 4 | -6.174  | -0.884 | 1.191  | 1.00 | 0.00 | C   |
| ATOM | 33 | CG   | PHE | 4 | -6.568  | -0.544 | 2.635  | 1.00 | 0.00 | C   |
| ATOM | 34 | CD1  | PHE | 4 | -5.951  | -1.326 | 3.610  | 1.00 | 0.00 | C   |
| ATOM | 35 | CD2  | PHE | 4 | -7.503  | 0.444  | 2.910  | 1.00 | 0.00 | C   |
| ATOM | 36 | CE1  | PHE | 4 | -6.318  | -1.176 | 4.946  | 1.00 | 0.00 | C   |
| ATOM | 37 | CE2  | PHE | 4 | -7.883  | 0.517  | 4.242  | 1.00 | 0.00 | C   |
| ATOM | 38 | CZ   | PHE | 4 | -7.301  | -0.245 | 5.256  | 1.00 | 0.00 | C   |
| ATOM | 39 | H    | PHE | 4 | -6.663  | -3.205 | 1.794  | 1.00 | 0.00 | H   |
| ATOM | 40 | HD1  | PHE | 4 | -5.134  | -1.993 | 3.356  | 1.00 | 0.00 | H   |
| ATOM | 41 | HD2  | PHE | 4 | -7.987  | 1.130  | 2.218  | 1.00 | 0.00 | H   |
| ATOM | 42 | HE1  | PHE | 4 | -5.608  | -1.575 | 5.662  | 1.00 | 0.00 | H   |
| ATOM | 43 | HE2  | PHE | 4 | -8.621  | 1.288  | 4.437  | 1.00 | 0.00 | H   |
| ATOM | 44 | HZ   | PHE | 4 | -7.566  | -0.113 | 6.300  | 1.00 | 0.00 | H   |
| ATOM | 45 | N    | ARG | 5 | -6.374  | -2.463 | -1.736 | 1.00 | 0.00 | N   |
| ATOM | 46 | CA   | ARG | 5 | -6.156  | -2.573 | -3.188 | 1.00 | 0.00 | C   |
| ATOM | 47 | C    | ARG | 5 | -7.526  | -2.940 | -3.753 | 1.00 | 0.00 | C   |
| ATOM | 48 | O    | ARG | 5 | -8.200  | -2.199 | -4.459 | 1.00 | 0.00 | O   |
| ATOM | 49 | CB   | ARG | 5 | -5.094  | -3.641 | -3.459 | 1.00 | 0.00 | C   |
| ATOM | 50 | CG   | ARG | 5 | -3.715  | -3.171 | -2.996 | 1.00 | 0.00 | C   |
| ATOM | 51 | CD   | ARG | 5 | -2.709  | -4.336 | -3.028 | 1.00 | 0.00 | C   |
| ATOM | 52 | NE   | ARG | 5 | -1.555  | -3.852 | -2.260 | 1.00 | 0.00 | N   |
| ATOM | 53 | CZ   | ARG | 5 | -1.143  | -4.331 | -1.080 | 1.00 | 0.00 | C   |
| ATOM | 54 | NH1  | ARG | 5 | -1.914  | -5.097 | -0.304 | 1.00 | 0.00 | N1+ |
| ATOM | 55 | NH2  | ARG | 5 | 0.169   | -4.354 | -0.811 | 1.00 | 0.00 | N   |
| ATOM | 56 | H    | ARG | 5 | -6.135  | -3.245 | -1.175 | 1.00 | 0.00 | H   |
| ATOM | 57 | HE   | ARG | 5 | -1.003  | -3.141 | -2.707 | 1.00 | 0.00 | H   |
| ATOM | 58 | 1HH1 | ARG | 5 | -2.891  | -5.287 | -0.430 | 1.00 | 0.00 | H   |
| ATOM | 59 | 2HH1 | ARG | 5 | -1.660  | -5.560 | 0.551  | 1.00 | 0.00 | H   |
| ATOM | 60 | 1HH2 | ARG | 5 | 0.819   | -4.004 | -1.484 | 1.00 | 0.00 | H   |
| ATOM | 61 | 2HH2 | ARG | 5 | 0.481   | -4.645 | 0.096  | 1.00 | 0.00 | H   |

|      |     |     |     |    |         |        |        |      |      |     |
|------|-----|-----|-----|----|---------|--------|--------|------|------|-----|
| ATOM | 62  | N   | HIS | 6  | -8.033  | -4.133 | -3.421 | 1.00 | 0.00 | N   |
| ATOM | 63  | CA  | HIS | 6  | -9.259  | -4.774 | -3.895 | 1.00 | 0.00 | C   |
| ATOM | 64  | C   | HIS | 6  | -10.582 | -4.084 | -3.566 | 1.00 | 0.00 | C   |
| ATOM | 65  | O   | HIS | 6  | -11.335 | -3.877 | -4.528 | 1.00 | 0.00 | O   |
| ATOM | 66  | CB  | HIS | 6  | -9.354  | -6.271 | -3.593 | 1.00 | 0.00 | C   |
| ATOM | 67  | CG  | HIS | 6  | -8.556  | -7.097 | -4.612 | 1.00 | 0.00 | C   |
| ATOM | 68  | CD2 | HIS | 6  | -7.371  | -7.664 | -4.420 | 1.00 | 0.00 | C   |
| ATOM | 69  | ND1 | HIS | 6  | -8.888  | -7.343 | -5.873 | 1.00 | 0.00 | N   |
| ATOM | 70  | CE1 | HIS | 6  | -7.964  | -8.062 | -6.496 | 1.00 | 0.00 | C   |
| ATOM | 71  | NE2 | HIS | 6  | -7.057  | -8.286 | -5.556 | 1.00 | 0.00 | N   |
| ATOM | 72  | H   | HIS | 6  | -7.535  | -4.703 | -2.763 | 1.00 | 0.00 | H   |
| ATOM | 73  | HD2 | HIS | 6  | -6.652  | -7.479 | -3.624 | 1.00 | 0.00 | H   |
| ATOM | 74  | HE1 | HIS | 6  | -7.943  | -8.206 | -7.575 | 1.00 | 0.00 | H   |
| ATOM | 75  | HE2 | HIS | 6  | -6.338  | -8.975 | -5.715 | 1.00 | 0.00 | H   |
| ATOM | 76  | N   | ASP | 7  | -10.784 | -3.972 | -2.259 | 1.00 | 0.00 | N   |
| ATOM | 77  | CA  | ASP | 7  | -11.895 | -3.107 | -1.811 | 1.00 | 0.00 | C   |
| ATOM | 78  | C   | ASP | 7  | -11.663 | -2.954 | -0.307 | 1.00 | 0.00 | C   |
| ATOM | 79  | O   | ASP | 7  | -11.681 | -3.891 | 0.481  | 1.00 | 0.00 | O   |
| ATOM | 80  | CB  | ASP | 7  | -13.289 | -3.703 | -2.002 | 1.00 | 0.00 | C   |
| ATOM | 81  | CG  | ASP | 7  | -14.455 | -2.812 | -1.543 | 1.00 | 0.00 | C   |
| ATOM | 82  | OD1 | ASP | 7  | -14.261 | -1.630 | -1.885 | 1.00 | 0.00 | O   |
| ATOM | 83  | OD2 | ASP | 7  | -15.241 | -3.201 | -0.655 | 1.00 | 0.00 | O1- |
| ATOM | 84  | H   | ASP | 7  | -10.106 | -4.294 | -1.606 | 1.00 | 0.00 | H   |
| ATOM | 85  | N   | SER | 8  | -11.640 | -1.642 | -0.044 | 1.00 | 0.00 | N   |
| ATOM | 86  | CA  | SER | 8  | -11.762 | -1.042 | 1.293  | 1.00 | 0.00 | C   |
| ATOM | 87  | C   | SER | 8  | -13.083 | -0.365 | 1.665  | 1.00 | 0.00 | C   |
| ATOM | 88  | O   | SER | 8  | -13.120 | 0.391  | 2.636  | 1.00 | 0.00 | O   |
| ATOM | 89  | CB  | SER | 8  | -10.754 | 0.098  | 1.281  | 1.00 | 0.00 | C   |
| ATOM | 90  | OG  | SER | 8  | -10.970 | 1.105  | 0.285  | 1.00 | 0.00 | O   |
| ATOM | 91  | H   | SER | 8  | -11.261 | -0.949 | -0.656 | 1.00 | 0.00 | H   |
| ATOM | 92  | HG  | SER | 8  | -11.522 | 1.860  | 0.641  | 1.00 | 0.00 | H   |
| ATOM | 93  | N   | GLY | 9  | -14.107 | -0.660 | 0.868  | 1.00 | 0.00 | N   |
| ATOM | 94  | CA  | GLY | 9  | -15.442 | -0.061 | 0.857  | 1.00 | 0.00 | C   |
| ATOM | 95  | C   | GLY | 9  | -15.356 | 1.447  | 1.096  | 1.00 | 0.00 | C   |
| ATOM | 96  | O   | GLY | 9  | -14.568 | 2.190  | 0.508  | 1.00 | 0.00 | O   |
| ATOM | 97  | H   | GLY | 9  | -14.014 | -1.281 | 0.090  | 1.00 | 0.00 | H   |
| ATOM | 98  | N   | TYR | 10 | -15.880 | 1.865  | 2.241  | 1.00 | 0.00 | N   |
| ATOM | 99  | CA  | TYR | 10 | -15.963 | 3.245  | 2.747  | 1.00 | 0.00 | C   |
| ATOM | 100 | C   | TYR | 10 | -14.601 | 3.922  | 2.935  | 1.00 | 0.00 | C   |
| ATOM | 101 | O   | TYR | 10 | -14.434 | 5.122  | 2.694  | 1.00 | 0.00 | O   |
| ATOM | 102 | CB  | TYR | 10 | -16.792 | 3.277  | 4.037  | 1.00 | 0.00 | C   |
| ATOM | 103 | CG  | TYR | 10 | -17.285 | 4.675  | 4.404  | 1.00 | 0.00 | C   |
| ATOM | 104 | CD1 | TYR | 10 | -18.510 | 5.090  | 3.897  | 1.00 | 0.00 | C   |
| ATOM | 105 | CD2 | TYR | 10 | -16.501 | 5.581  | 5.104  | 1.00 | 0.00 | C   |
| ATOM | 106 | CE1 | TYR | 10 | -18.911 | 6.428  | 3.878  | 1.00 | 0.00 | C   |
| ATOM | 107 | CE2 | TYR | 10 | -16.930 | 6.895  | 5.113  | 1.00 | 0.00 | C   |
| ATOM | 108 | CZ  | TYR | 10 | -18.094 | 7.365  | 4.497  | 1.00 | 0.00 | C   |
| ATOM | 109 | OH  | TYR | 10 | -18.365 | 8.678  | 4.276  | 1.00 | 0.00 | O   |
| ATOM | 110 | H   | TYR | 10 | -16.316 | 1.175  | 2.817  | 1.00 | 0.00 | H   |
| ATOM | 111 | HD1 | TYR | 10 | -19.176 | 4.293  | 3.584  | 1.00 | 0.00 | H   |
| ATOM | 112 | HD2 | TYR | 10 | -15.517 | 5.285  | 5.478  | 1.00 | 0.00 | H   |
| ATOM | 113 | HE1 | TYR | 10 | -19.940 | 6.678  | 3.640  | 1.00 | 0.00 | H   |
| ATOM | 114 | HE2 | TYR | 10 | -16.486 | 7.670  | 5.738  | 1.00 | 0.00 | H   |
| ATOM | 115 | HH  | TYR | 10 | -17.638 | 9.304  | 4.545  | 1.00 | 0.00 | H   |
| ATOM | 116 | N   | GLU | 11 | -13.668 | 3.134  | 3.440  | 1.00 | 0.00 | N   |
| ATOM | 117 | CA  | GLU | 11 | -12.386 | 3.748  | 3.802  | 1.00 | 0.00 | C   |
| ATOM | 118 | C   | GLU | 11 | -11.651 | 4.209  | 2.547  | 1.00 | 0.00 | C   |
| ATOM | 119 | O   | GLU | 11 | -11.788 | 3.567  | 1.499  | 1.00 | 0.00 | O   |
| ATOM | 120 | CB  | GLU | 11 | -11.604 | 2.694  | 4.599  | 1.00 | 0.00 | C   |
| ATOM | 121 | CG  | GLU | 11 | -10.371 | 3.225  | 5.320  | 1.00 | 0.00 | C   |
| ATOM | 122 | CD  | GLU | 11 | -10.637 | 4.512  | 6.096  | 1.00 | 0.00 | C   |
| ATOM | 123 | OE1 | GLU | 11 | -10.612 | 5.643  | 5.565  | 1.00 | 0.00 | O   |
| ATOM | 124 | OE2 | GLU | 11 | -10.658 | 4.383  | 7.341  | 1.00 | 0.00 | O1- |
| ATOM | 125 | H   | GLU | 11 | -13.666 | 2.148  | 3.234  | 1.00 | 0.00 | H   |
| ATOM | 126 | N   | VAL | 12 | -10.731 | 5.144  | 2.798  | 1.00 | 0.00 | N   |
| ATOM | 127 | CA  | VAL | 12 | -9.870  | 5.682  | 1.731  | 1.00 | 0.00 | C   |
| ATOM | 128 | C   | VAL | 12 | -8.905  | 4.705  | 1.053  | 1.00 | 0.00 | C   |
| ATOM | 129 | O   | VAL | 12 | -8.453  | 3.777  | 1.713  | 1.00 | 0.00 | O   |

|      |     |      |     |    |         |        |        |      |      |     |
|------|-----|------|-----|----|---------|--------|--------|------|------|-----|
| ATOM | 130 | CB   | VAL | 12 | -9.149  | 6.916  | 2.281  | 1.00 | 0.00 | C   |
| ATOM | 131 | CG1  | VAL | 12 | -9.985  | 8.005  | 2.956  | 1.00 | 0.00 | C   |
| ATOM | 132 | CG2  | VAL | 12 | -8.052  | 6.523  | 3.266  | 1.00 | 0.00 | C   |
| ATOM | 133 | H    | VAL | 12 | -10.496 | 5.428  | 3.734  | 1.00 | 0.00 | H   |
| ATOM | 134 | N    | HIS | 13 | -8.871  | 4.814  | -0.282 | 1.00 | 0.00 | N   |
| ATOM | 135 | CA   | HIS | 13 | -7.903  | 4.009  | -1.035 | 1.00 | 0.00 | C   |
| ATOM | 136 | C    | HIS | 13 | -6.684  | 4.870  | -1.330 | 1.00 | 0.00 | C   |
| ATOM | 137 | O    | HIS | 13 | -5.609  | 4.479  | -0.864 | 1.00 | 0.00 | O   |
| ATOM | 138 | CB   | HIS | 13 | -8.525  | 3.412  | -2.302 | 1.00 | 0.00 | C   |
| ATOM | 139 | CG   | HIS | 13 | -9.371  | 4.342  | -3.171 | 1.00 | 0.00 | C   |
| ATOM | 140 | CD2  | HIS | 13 | -10.294 | 3.941  | -4.039 | 1.00 | 0.00 | C   |
| ATOM | 141 | ND1  | HIS | 13 | -9.477  | 5.670  | -3.022 | 1.00 | 0.00 | N   |
| ATOM | 142 | CE1  | HIS | 13 | -10.447 | 6.102  | -3.823 | 1.00 | 0.00 | C   |
| ATOM | 143 | NE2  | HIS | 13 | -10.986 | 5.027  | -4.390 | 1.00 | 0.00 | N   |
| ATOM | 144 | H    | HIS | 13 | -9.303  | 5.514  | -0.838 | 1.00 | 0.00 | H   |
| ATOM | 145 | HD2  | HIS | 13 | -10.350 | 2.895  | -4.340 | 1.00 | 0.00 | H   |
| ATOM | 146 | HE1  | HIS | 13 | -10.856 | 7.101  | -3.959 | 1.00 | 0.00 | H   |
| ATOM | 147 | HE2  | HIS | 13 | -11.867 | 4.994  | -4.852 | 1.00 | 0.00 | H   |
| ATOM | 148 | N    | HIS | 14 | -6.751  | 5.896  | -2.169 | 1.00 | 0.00 | N   |
| ATOM | 149 | CA   | HIS | 14 | -5.711  | 6.909  | -2.405 | 1.00 | 0.00 | C   |
| ATOM | 150 | C    | HIS | 14 | -4.650  | 7.199  | -1.345 | 1.00 | 0.00 | C   |
| ATOM | 151 | O    | HIS | 14 | -3.485  | 6.971  | -1.677 | 1.00 | 0.00 | O   |
| ATOM | 152 | CB   | HIS | 14 | -6.365  | 8.200  | -2.902 | 1.00 | 0.00 | C   |
| ATOM | 153 | CG   | HIS | 14 | -7.535  | 8.704  | -2.071 | 1.00 | 0.00 | C   |
| ATOM | 154 | CD2  | HIS | 14 | -8.736  | 8.930  | -2.594 | 1.00 | 0.00 | C   |
| ATOM | 155 | ND1  | HIS | 14 | -7.502  | 9.039  | -0.778 | 1.00 | 0.00 | N   |
| ATOM | 156 | CE1  | HIS | 14 | -8.731  | 9.427  | -0.451 | 1.00 | 0.00 | C   |
| ATOM | 157 | NE2  | HIS | 14 | -9.445  | 9.388  | -1.562 | 1.00 | 0.00 | N   |
| ATOM | 158 | H    | HIS | 14 | -7.550  | 5.971  | -2.763 | 1.00 | 0.00 | H   |
| ATOM | 159 | HD2  | HIS | 14 | -9.043  | 8.752  | -3.625 | 1.00 | 0.00 | H   |
| ATOM | 160 | HE1  | HIS | 14 | -9.183  | 9.351  | 0.549  | 1.00 | 0.00 | H   |
| ATOM | 161 | HE2  | HIS | 14 | -10.417 | 9.605  | -1.604 | 1.00 | 0.00 | H   |
| ATOM | 162 | N    | GLN | 15 | -5.015  | 7.573  | -0.124 | 1.00 | 0.00 | N   |
| ATOM | 163 | CA   | GLN | 15 | -4.137  | 7.670  | 1.052  | 1.00 | 0.00 | C   |
| ATOM | 164 | C    | GLN | 15 | -3.494  | 6.359  | 1.493  | 1.00 | 0.00 | C   |
| ATOM | 165 | O    | GLN | 15 | -2.264  | 6.307  | 1.489  | 1.00 | 0.00 | O   |
| ATOM | 166 | CB   | GLN | 15 | -4.895  | 8.302  | 2.219  | 1.00 | 0.00 | C   |
| ATOM | 167 | CG   | GLN | 15 | -5.263  | 9.756  | 1.928  | 1.00 | 0.00 | C   |
| ATOM | 168 | CD   | GLN | 15 | -4.064  | 10.662 | 1.668  | 1.00 | 0.00 | C   |
| ATOM | 169 | NE2  | GLN | 15 | -4.179  | 11.629 | 0.763  | 1.00 | 0.00 | N   |
| ATOM | 170 | OE1  | GLN | 15 | -3.046  | 10.547 | 2.361  | 1.00 | 0.00 | O   |
| ATOM | 171 | H    | GLN | 15 | -5.882  | 8.059  | -0.035 | 1.00 | 0.00 | H   |
| ATOM | 172 | 1HE2 | GLN | 15 | -5.057  | 11.714 | 0.297  | 1.00 | 0.00 | H   |
| ATOM | 173 | 2HE2 | GLN | 15 | -3.367  | 12.121 | 0.436  | 1.00 | 0.00 | H   |
| ATOM | 174 | N    | LYS | 16 | -4.233  | 5.253  | 1.494  | 1.00 | 0.00 | N   |
| ATOM | 175 | CA   | LYS | 16 | -3.580  | 3.948  | 1.697  | 1.00 | 0.00 | C   |
| ATOM | 176 | C    | LYS | 16 | -2.723  | 3.382  | 0.560  | 1.00 | 0.00 | C   |
| ATOM | 177 | O    | LYS | 16 | -1.742  | 2.699  | 0.835  | 1.00 | 0.00 | O   |
| ATOM | 178 | CB   | LYS | 16 | -4.513  | 2.855  | 2.215  | 1.00 | 0.00 | C   |
| ATOM | 179 | CG   | LYS | 16 | -5.324  | 3.217  | 3.470  | 1.00 | 0.00 | C   |
| ATOM | 180 | CD   | LYS | 16 | -4.529  | 2.692  | 4.663  | 1.00 | 0.00 | C   |
| ATOM | 181 | CE   | LYS | 16 | -5.168  | 3.197  | 5.956  | 1.00 | 0.00 | C   |
| ATOM | 182 | NZ   | LYS | 16 | -4.391  | 2.946  | 7.179  | 1.00 | 0.00 | N1+ |
| ATOM | 183 | H    | LYS | 16 | -5.106  | 5.307  | 1.014  | 1.00 | 0.00 | H   |
| ATOM | 184 | HZ1  | LYS | 16 | -3.429  | 3.198  | 7.090  | 1.00 | 0.00 | H   |
| ATOM | 185 | HZ2  | LYS | 16 | -4.751  | 3.498  | 7.925  | 1.00 | 0.00 | H   |
| ATOM | 186 | HZ3  | LYS | 16 | -4.401  | 1.979  | 7.441  | 1.00 | 0.00 | H   |
| ATOM | 187 | N    | LEU | 17 | -2.995  | 3.781  | -0.680 | 1.00 | 0.00 | N   |
| ATOM | 188 | CA   | LEU | 17 | -2.037  | 3.548  | -1.779 | 1.00 | 0.00 | C   |
| ATOM | 189 | C    | LEU | 17 | -0.698  | 4.275  | -1.732 | 1.00 | 0.00 | C   |
| ATOM | 190 | O    | LEU | 17 | 0.358   | 3.658  | -1.865 | 1.00 | 0.00 | O   |
| ATOM | 191 | CB   | LEU | 17 | -2.776  | 3.761  | -3.102 | 1.00 | 0.00 | C   |
| ATOM | 192 | CG   | LEU | 17 | -3.852  | 2.723  | -3.431 | 1.00 | 0.00 | C   |
| ATOM | 193 | CD1  | LEU | 17 | -4.551  | 3.058  | -4.750 | 1.00 | 0.00 | C   |
| ATOM | 194 | CD2  | LEU | 17 | -3.147  | 1.372  | -3.612 | 1.00 | 0.00 | C   |
| ATOM | 195 | H    | LEU | 17 | -3.925  | 3.997  | -0.951 | 1.00 | 0.00 | H   |
| ATOM | 196 | N    | VAL | 18 | -0.802  | 5.508  | -1.237 | 1.00 | 0.00 | N   |
| ATOM | 197 | CA   | VAL | 18 | 0.430   | 6.265  | -0.959 | 1.00 | 0.00 | C   |

|      |     |     |     |    |        |        |        |      |      |     |
|------|-----|-----|-----|----|--------|--------|--------|------|------|-----|
| ATOM | 198 | C   | VAL | 18 | 1.252  | 5.590  | 0.138  | 1.00 | 0.00 | C   |
| ATOM | 199 | O   | VAL | 18 | 2.430  | 5.332  | -0.087 | 1.00 | 0.00 | O   |
| ATOM | 200 | CB  | VAL | 18 | 0.406  | 7.783  | -0.763 | 1.00 | 0.00 | C   |
| ATOM | 201 | CG1 | VAL | 18 | 1.745  | 8.446  | -0.447 | 1.00 | 0.00 | C   |
| ATOM | 202 | CG2 | VAL | 18 | -0.229 | 8.468  | -1.973 | 1.00 | 0.00 | C   |
| ATOM | 203 | H   | VAL | 18 | -1.597 | 6.079  | -1.395 | 1.00 | 0.00 | H   |
| ATOM | 204 | N   | PHE | 19 | 0.609  | 5.175  | 1.232  | 1.00 | 0.00 | N   |
| ATOM | 205 | CA  | PHE | 19 | 1.195  | 4.483  | 2.387  | 1.00 | 0.00 | C   |
| ATOM | 206 | C   | PHE | 19 | 1.793  | 3.138  | 1.969  | 1.00 | 0.00 | C   |
| ATOM | 207 | O   | PHE | 19 | 2.954  | 2.817  | 2.208  | 1.00 | 0.00 | O   |
| ATOM | 208 | CB  | PHE | 19 | 0.141  | 4.202  | 3.463  | 1.00 | 0.00 | C   |
| ATOM | 209 | CG  | PHE | 19 | 0.353  | 2.977  | 4.358  | 1.00 | 0.00 | C   |
| ATOM | 210 | CD1 | PHE | 19 | 1.129  | 3.211  | 5.487  | 1.00 | 0.00 | C   |
| ATOM | 211 | CD2 | PHE | 19 | -0.520 | 1.898  | 4.274  | 1.00 | 0.00 | C   |
| ATOM | 212 | CE1 | PHE | 19 | 1.058  | 2.332  | 6.556  | 1.00 | 0.00 | C   |
| ATOM | 213 | CE2 | PHE | 19 | -0.591 | 1.020  | 5.353  | 1.00 | 0.00 | C   |
| ATOM | 214 | CZ  | PHE | 19 | 0.218  | 1.229  | 6.463  | 1.00 | 0.00 | C   |
| ATOM | 215 | H   | PHE | 19 | -0.387 | 5.204  | 1.250  | 1.00 | 0.00 | H   |
| ATOM | 216 | HD1 | PHE | 19 | 2.019  | 3.838  | 5.402  | 1.00 | 0.00 | H   |
| ATOM | 217 | HD2 | PHE | 19 | -1.152 | 1.736  | 3.403  | 1.00 | 0.00 | H   |
| ATOM | 218 | HE1 | PHE | 19 | 1.650  | 2.526  | 7.454  | 1.00 | 0.00 | H   |
| ATOM | 219 | HE2 | PHE | 19 | -1.299 | 0.196  | 5.489  | 1.00 | 0.00 | H   |
| ATOM | 220 | HZ  | PHE | 19 | 0.254  | 0.492  | 7.269  | 1.00 | 0.00 | H   |
| ATOM | 221 | N   | PHE | 20 | 1.112  | 2.371  | 1.119  | 1.00 | 0.00 | N   |
| ATOM | 222 | CA  | PHE | 20 | 1.596  | 1.153  | 0.442  | 1.00 | 0.00 | C   |
| ATOM | 223 | C   | PHE | 20 | 2.756  | 1.267  | -0.551 | 1.00 | 0.00 | C   |
| ATOM | 224 | O   | PHE | 20 | 3.696  | 0.472  | -0.485 | 1.00 | 0.00 | O   |
| ATOM | 225 | CB  | PHE | 20 | 0.639  | 0.339  | -0.423 | 1.00 | 0.00 | C   |
| ATOM | 226 | CG  | PHE | 20 | -0.599 | -0.331 | 0.194  | 1.00 | 0.00 | C   |
| ATOM | 227 | CD1 | PHE | 20 | -0.412 | -1.250 | 1.226  | 1.00 | 0.00 | C   |
| ATOM | 228 | CD2 | PHE | 20 | -1.777 | -0.340 | -0.531 | 1.00 | 0.00 | C   |
| ATOM | 229 | CE1 | PHE | 20 | -1.377 | -2.173 | 1.621  | 1.00 | 0.00 | C   |
| ATOM | 230 | CE2 | PHE | 20 | -2.768 | -1.228 | -0.110 | 1.00 | 0.00 | C   |
| ATOM | 231 | CZ  | PHE | 20 | -2.575 | -2.139 | 0.920  | 1.00 | 0.00 | C   |
| ATOM | 232 | H   | PHE | 20 | 0.264  | 2.578  | 0.637  | 1.00 | 0.00 | H   |
| ATOM | 233 | HD1 | PHE | 20 | 0.549  | -1.277 | 1.744  | 1.00 | 0.00 | H   |
| ATOM | 234 | HD2 | PHE | 20 | -1.968 | 0.356  | -1.356 | 1.00 | 0.00 | H   |
| ATOM | 235 | HE1 | PHE | 20 | -1.410 | -2.597 | 2.628  | 1.00 | 0.00 | H   |
| ATOM | 236 | HE2 | PHE | 20 | -3.766 | -1.278 | -0.548 | 1.00 | 0.00 | H   |
| ATOM | 237 | HZ  | PHE | 20 | -3.334 | -2.911 | 1.092  | 1.00 | 0.00 | H   |
| ATOM | 238 | N   | ALA | 21 | 2.749  | 2.255  | -1.439 | 1.00 | 0.00 | N   |
| ATOM | 239 | CA  | ALA | 21 | 3.891  | 2.764  | -2.210 | 1.00 | 0.00 | C   |
| ATOM | 240 | C   | ALA | 21 | 5.037  | 3.333  | -1.366 | 1.00 | 0.00 | C   |
| ATOM | 241 | O   | ALA | 21 | 6.183  | 3.203  | -1.788 | 1.00 | 0.00 | O   |
| ATOM | 242 | CB  | ALA | 21 | 3.301  | 3.798  | -3.175 | 1.00 | 0.00 | C   |
| ATOM | 243 | H   | ALA | 21 | 1.896  | 2.751  | -1.609 | 1.00 | 0.00 | H   |
| ATOM | 244 | N   | GLU | 22 | 4.830  | 4.068  | -0.283 | 1.00 | 0.00 | N   |
| ATOM | 245 | CA  | GLU | 22 | 5.919  | 4.359  | 0.662  | 1.00 | 0.00 | C   |
| ATOM | 246 | C   | GLU | 22 | 6.570  | 3.307  | 1.563  | 1.00 | 0.00 | C   |
| ATOM | 247 | O   | GLU | 22 | 7.569  | 2.664  | 1.236  | 1.00 | 0.00 | O   |
| ATOM | 248 | CB  | GLU | 22 | 5.411  | 5.492  | 1.563  | 1.00 | 0.00 | C   |
| ATOM | 249 | CG  | GLU | 22 | 5.229  | 6.850  | 0.885  | 1.00 | 0.00 | C   |
| ATOM | 250 | CD  | GLU | 22 | 5.313  | 7.864  | 2.029  | 1.00 | 0.00 | C   |
| ATOM | 251 | OE1 | GLU | 22 | 4.282  | 8.578  | 2.131  | 1.00 | 0.00 | O   |
| ATOM | 252 | OE2 | GLU | 22 | 6.275  | 7.966  | 2.818  | 1.00 | 0.00 | O1- |
| ATOM | 253 | H   | GLU | 22 | 3.935  | 4.492  | -0.127 | 1.00 | 0.00 | H   |
| ATOM | 254 | N   | ASP | 23 | 5.713  | 2.748  | 2.419  | 1.00 | 0.00 | N   |
| ATOM | 255 | CA  | ASP | 23 | 6.147  | 1.945  | 3.569  | 1.00 | 0.00 | C   |
| ATOM | 256 | C   | ASP | 23 | 6.846  | 0.633  | 3.196  | 1.00 | 0.00 | C   |
| ATOM | 257 | O   | ASP | 23 | 8.025  | 0.474  | 3.504  | 1.00 | 0.00 | O   |
| ATOM | 258 | CB  | ASP | 23 | 5.015  | 1.744  | 4.575  | 1.00 | 0.00 | C   |
| ATOM | 259 | CG  | ASP | 23 | 5.347  | 0.740  | 5.682  | 1.00 | 0.00 | C   |
| ATOM | 260 | OD1 | ASP | 23 | 4.757  | -0.355 | 5.717  | 1.00 | 0.00 | O   |
| ATOM | 261 | OD2 | ASP | 23 | 6.175  | 1.138  | 6.538  | 1.00 | 0.00 | O1- |
| ATOM | 262 | H   | ASP | 23 | 4.730  | 2.932  | 2.456  | 1.00 | 0.00 | H   |
| ATOM | 263 | N   | VAL | 24 | 6.086  | -0.376 | 2.770  | 1.00 | 0.00 | N   |
| ATOM | 264 | CA  | VAL | 24 | 6.625  | -1.614 | 2.193  | 1.00 | 0.00 | C   |
| ATOM | 265 | C   | VAL | 24 | 7.219  | -1.404 | 0.796  | 1.00 | 0.00 | C   |

|      |     |      |     |    |        |        |        |      |      |     |
|------|-----|------|-----|----|--------|--------|--------|------|------|-----|
| ATOM | 266 | O    | VAL | 24 | 8.208  | -1.993 | 0.367  | 1.00 | 0.00 | O   |
| ATOM | 267 | CB   | VAL | 24 | 5.647  | -2.786 | 2.106  | 1.00 | 0.00 | C   |
| ATOM | 268 | CG1  | VAL | 24 | 5.208  | -3.200 | 3.519  | 1.00 | 0.00 | C   |
| ATOM | 269 | CG2  | VAL | 24 | 4.381  | -2.373 | 1.348  | 1.00 | 0.00 | C   |
| ATOM | 270 | H    | VAL | 24 | 5.123  | -0.528 | 3.014  | 1.00 | 0.00 | H   |
| ATOM | 271 | N    | GLY | 25 | 6.684  | -0.484 | -0.009 | 1.00 | 0.00 | N   |
| ATOM | 272 | CA   | GLY | 25 | 7.184  | -0.004 | -1.296 | 1.00 | 0.00 | C   |
| ATOM | 273 | C    | GLY | 25 | 8.580  | 0.623  | -1.357 | 1.00 | 0.00 | C   |
| ATOM | 274 | O    | GLY | 25 | 9.578  | -0.082 | -1.314 | 1.00 | 0.00 | O   |
| ATOM | 275 | H    | GLY | 25 | 5.706  | -0.268 | 0.124  | 1.00 | 0.00 | H   |
| ATOM | 276 | N    | SER | 26 | 8.630  | 1.948  | -1.355 | 1.00 | 0.00 | N   |
| ATOM | 277 | CA   | SER | 26 | 9.903  | 2.681  | -1.354 | 1.00 | 0.00 | C   |
| ATOM | 278 | C    | SER | 26 | 10.858 | 2.563  | -0.163 | 1.00 | 0.00 | C   |
| ATOM | 279 | O    | SER | 26 | 12.077 | 2.600  | -0.317 | 1.00 | 0.00 | O   |
| ATOM | 280 | CB   | SER | 26 | 9.768  | 4.190  | -1.606 | 1.00 | 0.00 | C   |
| ATOM | 281 | OG   | SER | 26 | 8.847  | 4.776  | -0.691 | 1.00 | 0.00 | O   |
| ATOM | 282 | H    | SER | 26 | 7.822  | 2.528  | -1.228 | 1.00 | 0.00 | H   |
| ATOM | 283 | HG   | SER | 26 | 9.283  | 5.533  | -0.205 | 1.00 | 0.00 | H   |
| ATOM | 284 | N    | ASN | 27 | 10.398 | 2.409  | 1.078  | 1.00 | 0.00 | N   |
| ATOM | 285 | CA   | ASN | 27 | 11.255 | 2.074  | 2.218  | 1.00 | 0.00 | C   |
| ATOM | 286 | C    | ASN | 27 | 11.830 | 0.657  | 2.267  | 1.00 | 0.00 | C   |
| ATOM | 287 | O    | ASN | 27 | 12.818 | 0.433  | 1.562  | 1.00 | 0.00 | O   |
| ATOM | 288 | CB   | ASN | 27 | 10.714 | 2.588  | 3.551  | 1.00 | 0.00 | C   |
| ATOM | 289 | CG   | ASN | 27 | 10.601 | 4.112  | 3.693  | 1.00 | 0.00 | C   |
| ATOM | 290 | ND2  | ASN | 27 | 9.796  | 4.564  | 4.654  | 1.00 | 0.00 | N   |
| ATOM | 291 | OD1  | ASN | 27 | 11.605 | 4.783  | 3.456  | 1.00 | 0.00 | O   |
| ATOM | 292 | H    | ASN | 27 | 9.441  | 2.457  | 1.364  | 1.00 | 0.00 | H   |
| ATOM | 293 | 1HD2 | ASN | 27 | 9.264  | 3.966  | 5.261  | 1.00 | 0.00 | H   |
| ATOM | 294 | 2HD2 | ASN | 27 | 9.683  | 5.541  | 4.790  | 1.00 | 0.00 | H   |
| ATOM | 295 | N    | LYS | 28 | 11.008 | -0.239 | 2.787  | 1.00 | 0.00 | N   |
| ATOM | 296 | CA   | LYS | 28 | 11.278 | -1.664 | 3.040  | 1.00 | 0.00 | C   |
| ATOM | 297 | C    | LYS | 28 | 11.700 | -2.476 | 1.808  | 1.00 | 0.00 | C   |
| ATOM | 298 | O    | LYS | 28 | 12.340 | -3.523 | 1.900  | 1.00 | 0.00 | O   |
| ATOM | 299 | CB   | LYS | 28 | 10.055 | -2.171 | 3.808  | 1.00 | 0.00 | C   |
| ATOM | 300 | CG   | LYS | 28 | 9.933  | -1.533 | 5.199  | 1.00 | 0.00 | C   |
| ATOM | 301 | CD   | LYS | 28 | 8.639  | -2.086 | 5.799  | 1.00 | 0.00 | C   |
| ATOM | 302 | CE   | LYS | 28 | 8.402  | -1.684 | 7.257  | 1.00 | 0.00 | C   |
| ATOM | 303 | NZ   | LYS | 28 | 6.982  | -1.543 | 7.611  | 1.00 | 0.00 | N1+ |
| ATOM | 304 | H    | LYS | 28 | 10.189 | 0.076  | 3.273  | 1.00 | 0.00 | H   |
| ATOM | 305 | HZ1  | LYS | 28 | 6.547  | -2.385 | 7.315  | 1.00 | 0.00 | H   |
| ATOM | 306 | HZ2  | LYS | 28 | 6.847  | -1.284 | 8.576  | 1.00 | 0.00 | H   |
| ATOM | 307 | HZ3  | LYS | 28 | 6.523  | -0.869 | 7.031  | 1.00 | 0.00 | H   |
| ATOM | 308 | N    | GLY | 29 | 11.123 | -2.167 | 0.646  | 1.00 | 0.00 | N   |
| ATOM | 309 | CA   | GLY | 29 | 11.652 | -2.603 | -0.650 | 1.00 | 0.00 | C   |
| ATOM | 310 | C    | GLY | 29 | 12.969 | -1.931 | -1.060 | 1.00 | 0.00 | C   |
| ATOM | 311 | O    | GLY | 29 | 14.094 | -2.410 | -0.961 | 1.00 | 0.00 | O   |
| ATOM | 312 | H    | GLY | 29 | 10.192 | -1.806 | 0.653  | 1.00 | 0.00 | H   |
| ATOM | 313 | N    | ALA | 30 | 12.644 | -0.840 | -1.765 | 1.00 | 0.00 | N   |
| ATOM | 314 | CA   | ALA | 30 | 13.587 | -0.026 | -2.546 | 1.00 | 0.00 | C   |
| ATOM | 315 | C    | ALA | 30 | 14.829 | 0.683  | -2.005 | 1.00 | 0.00 | C   |
| ATOM | 316 | O    | ALA | 30 | 15.887 | 0.351  | -2.532 | 1.00 | 0.00 | O   |
| ATOM | 317 | CB   | ALA | 30 | 12.721 | 0.912  | -3.384 | 1.00 | 0.00 | C   |
| ATOM | 318 | H    | ALA | 30 | 11.700 | -0.498 | -1.721 | 1.00 | 0.00 | H   |
| ATOM | 319 | N    | ILE | 31 | 14.784 | 1.560  | -1.005 | 1.00 | 0.00 | N   |
| ATOM | 320 | CA   | ILE | 31 | 16.018 | 2.124  | -0.435 | 1.00 | 0.00 | C   |
| ATOM | 321 | C    | ILE | 31 | 17.064 | 1.161  | 0.135  | 1.00 | 0.00 | C   |
| ATOM | 322 | O    | ILE | 31 | 18.223 | 1.340  | -0.225 | 1.00 | 0.00 | O   |
| ATOM | 323 | CB   | ILE | 31 | 15.742 | 3.218  | 0.605  | 1.00 | 0.00 | C   |
| ATOM | 324 | CG1  | ILE | 31 | 14.937 | 2.796  | 1.839  | 1.00 | 0.00 | C   |
| ATOM | 325 | CG2  | ILE | 31 | 15.182 | 4.444  | -0.103 | 1.00 | 0.00 | C   |
| ATOM | 326 | CD   | ILE | 31 | 14.920 | 3.891  | 2.906  | 1.00 | 0.00 | C   |
| ATOM | 327 | H    | ILE | 31 | 13.910 | 1.766  | -0.563 | 1.00 | 0.00 | H   |
| ATOM | 328 | N    | ILE | 32 | 16.625 | -0.012 | 0.570  | 1.00 | 0.00 | N   |
| ATOM | 329 | CA   | ILE | 32 | 17.570 | -1.068 | 0.953  | 1.00 | 0.00 | C   |
| ATOM | 330 | C    | ILE | 32 | 18.003 | -2.047 | -0.145 | 1.00 | 0.00 | C   |
| ATOM | 331 | O    | ILE | 32 | 19.102 | -2.590 | -0.123 | 1.00 | 0.00 | O   |
| ATOM | 332 | CB   | ILE | 32 | 17.250 | -1.846 | 2.231  | 1.00 | 0.00 | C   |
| ATOM | 333 | CG1  | ILE | 32 | 15.854 | -2.494 | 2.214  | 1.00 | 0.00 | C   |

|      |     |     |     |    |        |        |        |      |      |   |
|------|-----|-----|-----|----|--------|--------|--------|------|------|---|
| ATOM | 334 | CG2 | ILE | 32 | 17.508 | -0.928 | 3.429  | 1.00 | 0.00 | C |
| ATOM | 335 | CD  | ILE | 32 | 16.034 | -3.878 | 2.826  | 1.00 | 0.00 | C |
| ATOM | 336 | H   | ILE | 32 | 15.685 | -0.299 | 0.767  | 1.00 | 0.00 | H |
| ATOM | 337 | N   | GLY | 33 | 17.111 | -2.364 | -1.083 | 1.00 | 0.00 | N |
| ATOM | 338 | CA  | GLY | 33 | 17.340 | -3.399 | -2.100 | 1.00 | 0.00 | C |
| ATOM | 339 | C   | GLY | 33 | 16.209 | -3.723 | -3.085 | 1.00 | 0.00 | C |
| ATOM | 340 | O   | GLY | 33 | 15.482 | -2.850 | -3.555 | 1.00 | 0.00 | O |
| ATOM | 341 | H   | GLY | 33 | 16.211 | -1.933 | -1.051 | 1.00 | 0.00 | H |
| ATOM | 342 | N   | LEU | 34 | 15.791 | -4.980 | -3.168 | 1.00 | 0.00 | N |
| ATOM | 343 | CA  | LEU | 34 | 14.698 | -5.389 | -4.058 | 1.00 | 0.00 | C |
| ATOM | 344 | C   | LEU | 34 | 13.305 | -5.458 | -3.421 | 1.00 | 0.00 | C |
| ATOM | 345 | O   | LEU | 34 | 13.098 | -5.321 | -2.210 | 1.00 | 0.00 | O |
| ATOM | 346 | CB  | LEU | 34 | 15.102 | -6.733 | -4.673 | 1.00 | 0.00 | C |
| ATOM | 347 | CG  | LEU | 34 | 16.425 | -6.858 | -5.439 | 1.00 | 0.00 | C |
| ATOM | 348 | CD1 | LEU | 34 | 16.484 | -8.313 | -5.918 | 1.00 | 0.00 | C |
| ATOM | 349 | CD2 | LEU | 34 | 16.666 | -5.920 | -6.618 | 1.00 | 0.00 | C |
| ATOM | 350 | H   | LEU | 34 | 16.090 | -5.681 | -2.517 | 1.00 | 0.00 | H |
| ATOM | 351 | N   | MET | 35 | 12.334 | -5.427 | -4.327 | 1.00 | 0.00 | N |
| ATOM | 352 | CA  | MET | 35 | 10.987 | -5.035 | -3.897 | 1.00 | 0.00 | C |
| ATOM | 353 | C   | MET | 35 | 10.166 | -6.149 | -3.233 | 1.00 | 0.00 | C |
| ATOM | 354 | O   | MET | 35 | 10.298 | -7.344 | -3.462 | 1.00 | 0.00 | O |
| ATOM | 355 | CB  | MET | 35 | 10.261 | -4.380 | -5.072 | 1.00 | 0.00 | C |
| ATOM | 356 | CG  | MET | 35 | 10.822 | -2.985 | -5.378 | 1.00 | 0.00 | C |
| ATOM | 357 | SD  | MET | 35 | 9.887  | -1.796 | -4.365 | 1.00 | 0.00 | S |
| ATOM | 358 | CE  | MET | 35 | 9.843  | -0.424 | -5.499 | 1.00 | 0.00 | C |
| ATOM | 359 | H   | MET | 35 | 12.434 | -5.854 | -5.226 | 1.00 | 0.00 | H |
| ATOM | 360 | N   | VAL | 36 | 9.290  | -5.682 | -2.340 | 1.00 | 0.00 | N |
| ATOM | 361 | CA  | VAL | 36 | 8.489  | -6.567 | -1.487 | 1.00 | 0.00 | C |
| ATOM | 362 | C   | VAL | 36 | 6.987  | -6.251 | -1.457 | 1.00 | 0.00 | C |
| ATOM | 363 | O   | VAL | 36 | 6.264  | -7.227 | -1.238 | 1.00 | 0.00 | O |
| ATOM | 364 | CB  | VAL | 36 | 9.014  | -6.702 | -0.057 | 1.00 | 0.00 | C |
| ATOM | 365 | CG1 | VAL | 36 | 10.390 | -7.365 | 0.044  | 1.00 | 0.00 | C |
| ATOM | 366 | CG2 | VAL | 36 | 9.048  | -5.370 | 0.692  | 1.00 | 0.00 | C |
| ATOM | 367 | H   | VAL | 36 | 9.340  | -4.705 | -2.137 | 1.00 | 0.00 | H |
| ATOM | 368 | N   | GLY | 37 | 6.628  | -4.984 | -1.650 | 1.00 | 0.00 | N |
| ATOM | 369 | CA  | GLY | 37 | 5.215  | -4.609 | -1.784 | 1.00 | 0.00 | C |
| ATOM | 370 | C   | GLY | 37 | 4.828  | -3.167 | -2.121 | 1.00 | 0.00 | C |
| ATOM | 371 | O   | GLY | 37 | 5.714  | -2.367 | -2.434 | 1.00 | 0.00 | O |
| ATOM | 372 | H   | GLY | 37 | 7.245  | -4.204 | -1.616 | 1.00 | 0.00 | H |
| ATOM | 373 | N   | GLY | 38 | 3.544  | -2.988 | -2.413 | 1.00 | 0.00 | N |
| ATOM | 374 | CA  | GLY | 38 | 3.075  | -1.619 | -2.718 | 1.00 | 0.00 | C |
| ATOM | 375 | C   | GLY | 38 | 1.657  | -1.477 | -3.256 | 1.00 | 0.00 | C |
| ATOM | 376 | O   | GLY | 38 | 0.766  | -2.183 | -2.777 | 1.00 | 0.00 | O |
| ATOM | 377 | H   | GLY | 38 | 2.898  | -3.733 | -2.287 | 1.00 | 0.00 | H |
| ATOM | 378 | N   | VAL | 39 | 1.501  | -0.755 | -4.365 | 1.00 | 0.00 | N |
| ATOM | 379 | CA  | VAL | 39 | 0.192  | -0.498 | -4.986 | 1.00 | 0.00 | C |
| ATOM | 380 | C   | VAL | 39 | -0.471 | -1.737 | -5.602 | 1.00 | 0.00 | C |
| ATOM | 381 | O   | VAL | 39 | -1.693 | -1.838 | -5.517 | 1.00 | 0.00 | O |
| ATOM | 382 | CB  | VAL | 39 | 0.138  | 0.734  | -5.887 | 1.00 | 0.00 | C |
| ATOM | 383 | CG1 | VAL | 39 | 0.255  | 2.101  | -5.224 | 1.00 | 0.00 | C |
| ATOM | 384 | CG2 | VAL | 39 | 1.004  | 0.555  | -7.142 | 1.00 | 0.00 | C |
| ATOM | 385 | H   | VAL | 39 | 2.329  | -0.274 | -4.650 | 1.00 | 0.00 | H |
| ATOM | 386 | N   | VAL | 40 | 0.223  | -2.531 | -6.423 | 1.00 | 0.00 | N |
| ATOM | 387 | CA  | VAL | 40 | -0.386 | -3.790 | -6.886 | 1.00 | 0.00 | C |
| ATOM | 388 | C   | VAL | 40 | 0.242  | -4.998 | -6.178 | 1.00 | 0.00 | C |
| ATOM | 389 | O   | VAL | 40 | -0.464 | -5.901 | -5.729 | 1.00 | 0.00 | O |
| ATOM | 390 | CB  | VAL | 40 | -0.479 | -3.984 | -8.395 | 1.00 | 0.00 | C |
| ATOM | 391 | CG1 | VAL | 40 | -1.434 | -2.953 | -8.997 | 1.00 | 0.00 | C |
| ATOM | 392 | CG2 | VAL | 40 | 0.859  | -4.065 | -9.141 | 1.00 | 0.00 | C |
| ATOM | 393 | H   | VAL | 40 | 1.186  | -2.434 | -6.646 | 1.00 | 0.00 | H |
| ATOM | 394 | N   | ILE | 41 | 1.559  | -4.962 | -6.044 | 1.00 | 0.00 | N |
| ATOM | 395 | CA  | ILE | 41 | 2.370  | -5.974 | -5.350 | 1.00 | 0.00 | C |
| ATOM | 396 | C   | ILE | 41 | 2.149  | -6.054 | -3.840 | 1.00 | 0.00 | C |
| ATOM | 397 | O   | ILE | 41 | 1.951  | -5.058 | -3.135 | 1.00 | 0.00 | O |
| ATOM | 398 | CB  | ILE | 41 | 3.832  | -6.032 | -5.795 | 1.00 | 0.00 | C |
| ATOM | 399 | CG1 | ILE | 41 | 4.651  | -4.767 | -5.496 | 1.00 | 0.00 | C |
| ATOM | 400 | CG2 | ILE | 41 | 3.919  | -6.373 | -7.292 | 1.00 | 0.00 | C |
| ATOM | 401 | CD  | ILE | 41 | 6.183  | -4.848 | -5.575 | 1.00 | 0.00 | C |

|      |     |    |     |    |       |         |        |      |      |   |
|------|-----|----|-----|----|-------|---------|--------|------|------|---|
| ATOM | 402 | H  | ILE | 41 | 2.049 | -4.114  | -6.297 | 1.00 | 0.00 | H |
| ATOM | 403 | N  | ALA | 42 | 1.747 | -7.289  | -3.559 | 1.00 | 0.00 | N |
| ATOM | 404 | CA | ALA | 42 | 1.710 | -7.931  | -2.233 | 1.00 | 0.00 | C |
| ATOM | 405 | C  | ALA | 42 | 1.716 | -9.454  | -2.304 | 1.00 | 0.00 | C |
| ATOM | 406 | CB | ALA | 42 | 0.349 | -7.444  | -1.707 | 1.00 | 0.00 | C |
| ATOM | 407 | O1 | ALA | 42 | 0.842 | -10.032 | -2.988 | 1.00 | 0.00 | O |
| ATOM | 408 | O2 | ALA | 42 | 2.502 | -10.089 | -1.569 | 1.00 | 0.00 | O |
| ATOM | 409 | H  | ALA | 42 | 1.424 | -7.839  | -4.332 | 1.00 | 0.00 | H |
| END  |     |    |     |    |       |         |        |      |      |   |

## 2. A $\beta$ <sub>42</sub> monomer-6n complex

|      |    |     |     |   |   |         |        |       |      |      |     |
|------|----|-----|-----|---|---|---------|--------|-------|------|------|-----|
| ATOM | 1  | N   | ASP | A | 1 | -18.802 | 6.079  | 5.843 | 1.00 | 0.00 | N   |
| ATOM | 2  | CA  | ASP | A | 1 | -19.155 | 5.368  | 4.610 | 1.00 | 0.00 | C   |
| ATOM | 3  | C   | ASP | A | 1 | -17.933 | 4.642  | 4.038 | 1.00 | 0.00 | C   |
| ATOM | 4  | O   | ASP | A | 1 | -16.885 | 5.269  | 3.878 | 1.00 | 0.00 | O   |
| ATOM | 5  | CB  | ASP | A | 1 | -19.795 | 6.385  | 3.660 | 1.00 | 0.00 | C   |
| ATOM | 6  | CG  | ASP | A | 1 | -20.731 | 5.806  | 2.594 | 1.00 | 0.00 | C   |
| ATOM | 7  | OD1 | ASP | A | 1 | -21.746 | 6.450  | 2.273 | 1.00 | 0.00 | O   |
| ATOM | 8  | OD2 | ASP | A | 1 | -20.306 | 4.809  | 1.968 | 1.00 | 0.00 | O1- |
| ATOM | 9  | H1  | ASP | A | 1 | -18.334 | 5.464  | 6.477 | 1.00 | 0.00 | H   |
| ATOM | 10 | H2  | ASP | A | 1 | -18.306 | 6.953  | 5.800 | 1.00 | 0.00 | H   |
| ATOM | 11 | H3  | ASP | A | 1 | -19.659 | 6.251  | 6.343 | 1.00 | 0.00 | H   |
| ATOM | 12 | N   | ALA | A | 2 | -18.209 | 3.549  | 3.323 | 1.00 | 0.00 | N   |
| ATOM | 13 | CA  | ALA | A | 2 | -17.202 | 2.645  | 2.766 | 1.00 | 0.00 | C   |
| ATOM | 14 | C   | ALA | A | 2 | -16.139 | 2.012  | 3.665 | 1.00 | 0.00 | C   |
| ATOM | 15 | O   | ALA | A | 2 | -15.527 | 2.692  | 4.488 | 1.00 | 0.00 | O   |
| ATOM | 16 | CB  | ALA | A | 2 | -16.520 | 3.257  | 1.544 | 1.00 | 0.00 | C   |
| ATOM | 17 | H   | ALA | A | 2 | -19.140 | 3.464  | 2.960 | 1.00 | 0.00 | H   |
| ATOM | 18 | N   | GLU | A | 3 | -15.579 | 0.832  | 3.404 | 1.00 | 0.00 | N   |
| ATOM | 19 | CA  | GLU | A | 3 | -14.658 | 0.140  | 4.321 | 1.00 | 0.00 | C   |
| ATOM | 20 | C   | GLU | A | 3 | -13.546 | -0.422 | 3.433 | 1.00 | 0.00 | C   |
| ATOM | 21 | O   | GLU | A | 3 | -13.909 | -0.999 | 2.402 | 1.00 | 0.00 | O   |
| ATOM | 22 | CB  | GLU | A | 3 | -15.424 | -0.999 | 4.983 | 1.00 | 0.00 | C   |
| ATOM | 23 | CG  | GLU | A | 3 | -14.890 | -1.422 | 6.355 | 1.00 | 0.00 | C   |
| ATOM | 24 | CD  | GLU | A | 3 | -13.655 | -2.323 | 6.216 | 1.00 | 0.00 | C   |
| ATOM | 25 | OE1 | GLU | A | 3 | -12.596 | -1.964 | 6.769 | 1.00 | 0.00 | O   |
| ATOM | 26 | OE2 | GLU | A | 3 | -13.767 | -3.417 | 5.624 | 1.00 | 0.00 | O1- |
| ATOM | 27 | H   | GLU | A | 3 | -15.716 | 0.283  | 2.577 | 1.00 | 0.00 | H   |
| ATOM | 28 | N   | PHE | A | 4 | -12.388 | -0.549 | 4.070 | 1.00 | 0.00 | N   |
| ATOM | 29 | CA  | PHE | A | 4 | -11.096 | -0.918 | 3.461 | 1.00 | 0.00 | C   |
| ATOM | 30 | C   | PHE | A | 4 | -10.956 | -2.386 | 3.031 | 1.00 | 0.00 | C   |
| ATOM | 31 | O   | PHE | A | 4 | -10.031 | -2.639 | 2.262 | 1.00 | 0.00 | O   |
| ATOM | 32 | CB  | PHE | A | 4 | -9.789  | -0.673 | 4.205 | 1.00 | 0.00 | C   |
| ATOM | 33 | CG  | PHE | A | 4 | -9.443  | 0.815  | 4.114 | 1.00 | 0.00 | C   |
| ATOM | 34 | CD1 | PHE | A | 4 | -9.930  | 1.738  | 5.033 | 1.00 | 0.00 | C   |
| ATOM | 35 | CD2 | PHE | A | 4 | -8.983  | 1.324  | 2.899 | 1.00 | 0.00 | C   |
| ATOM | 36 | CE1 | PHE | A | 4 | -9.791  | 3.088  | 4.731 | 1.00 | 0.00 | C   |
| ATOM | 37 | CE2 | PHE | A | 4 | -8.871  | 2.678  | 2.606 | 1.00 | 0.00 | C   |
| ATOM | 38 | CZ  | PHE | A | 4 | -9.202  | 3.606  | 3.595 | 1.00 | 0.00 | C   |
| ATOM | 39 | H   | PHE | A | 4 | -12.462 | -0.396 | 5.051 | 1.00 | 0.00 | H   |
| ATOM | 40 | HD1 | PHE | A | 4 | -10.520 | 1.380  | 5.878 | 1.00 | 0.00 | H   |
| ATOM | 41 | HD2 | PHE | A | 4 | -8.757  | 0.501  | 2.220 | 1.00 | 0.00 | H   |
| ATOM | 42 | HE1 | PHE | A | 4 | -10.354 | 3.795  | 5.339 | 1.00 | 0.00 | H   |
| ATOM | 43 | HE2 | PHE | A | 4 | -8.619  | 3.074  | 1.621 | 1.00 | 0.00 | H   |
| ATOM | 44 | HZ  | PHE | A | 4 | -8.945  | 4.665  | 3.590 | 1.00 | 0.00 | H   |
| ATOM | 45 | N   | ARG | A | 5 | -11.613 | -3.356 | 3.659 | 1.00 | 0.00 | N   |
| ATOM | 46 | CA  | ARG | A | 5 | -11.473 | -4.749 | 3.198 | 1.00 | 0.00 | C   |
| ATOM | 47 | C   | ARG | A | 5 | -12.465 | -5.332 | 2.180 | 1.00 | 0.00 | C   |
| ATOM | 48 | O   | ARG | A | 5 | -12.153 | -6.338 | 1.556 | 1.00 | 0.00 | O   |
| ATOM | 49 | CB  | ARG | A | 5 | -11.339 | -5.570 | 4.484 | 1.00 | 0.00 | C   |
| ATOM | 50 | CG  | ARG | A | 5 | -10.057 | -6.397 | 4.535 | 1.00 | 0.00 | C   |
| ATOM | 51 | CD  | ARG | A | 5 | -9.798  | -7.049 | 5.900 | 1.00 | 0.00 | C   |
| ATOM | 52 | NE  | ARG | A | 5 | -9.874  | -6.089 | 7.008 | 1.00 | 0.00 | N   |
| ATOM | 53 | CZ  | ARG | A | 5 | -9.778  | -6.299 | 8.327 | 1.00 | 0.00 | C   |
| ATOM | 54 | NH1 | ARG | A | 5 | -9.752  | -7.546 | 8.806 | 1.00 | 0.00 | N1+ |
| ATOM | 55 | NH2 | ARG | A | 5 | -9.406  | -5.283 | 9.129 | 1.00 | 0.00 | N   |



|      |     |      |     |   |    |         |        |        |      |      |     |
|------|-----|------|-----|---|----|---------|--------|--------|------|------|-----|
| ATOM | 56  | H    | ARG | A | 5  | -12.177 | -3.205 | 4.459  | 1.00 | 0.00 | H   |
| ATOM | 57  | HE   | ARG | A | 5  | -9.864  | -5.150 | 6.660  | 1.00 | 0.00 | H   |
| ATOM | 58  | 1HH1 | ARG | A | 5  | -9.717  | -8.370 | 8.235  | 1.00 | 0.00 | H   |
| ATOM | 59  | 2HH1 | ARG | A | 5  | -9.536  | -7.706 | 9.770  | 1.00 | 0.00 | H   |
| ATOM | 60  | 1HH2 | ARG | A | 5  | -9.238  | -4.378 | 8.740  | 1.00 | 0.00 | H   |
| ATOM | 61  | 2HH2 | ARG | A | 5  | -9.191  | -5.569 | 10.064 | 1.00 | 0.00 | H   |
| ATOM | 62  | N    | HIS | A | 6  | -13.568 | -4.637 | 1.906  | 1.00 | 0.00 | N   |
| ATOM | 63  | CA   | HIS | A | 6  | -14.630 | -5.257 | 1.108  | 1.00 | 0.00 | C   |
| ATOM | 64  | C    | HIS | A | 6  | -14.501 | -5.373 | -0.413 | 1.00 | 0.00 | C   |
| ATOM | 65  | O    | HIS | A | 6  | -15.290 | -6.088 | -1.030 | 1.00 | 0.00 | O   |
| ATOM | 66  | CB   | HIS | A | 6  | -15.944 | -4.689 | 1.655  | 1.00 | 0.00 | C   |
| ATOM | 67  | CG   | HIS | A | 6  | -17.242 | -5.359 | 1.194  | 1.00 | 0.00 | C   |
| ATOM | 68  | CD2  | HIS | A | 6  | -18.170 | -4.896 | 0.364  | 1.00 | 0.00 | C   |
| ATOM | 69  | ND1  | HIS | A | 6  | -17.765 | -6.536 | 1.532  | 1.00 | 0.00 | N   |
| ATOM | 70  | CE1  | HIS | A | 6  | -18.924 | -6.833 | 0.951  | 1.00 | 0.00 | C   |
| ATOM | 71  | NE2  | HIS | A | 6  | -19.196 | -5.732 | 0.252  | 1.00 | 0.00 | N   |
| ATOM | 72  | H    | HIS | A | 6  | -13.705 | -3.700 | 2.237  | 1.00 | 0.00 | H   |
| ATOM | 73  | HD2  | HIS | A | 6  | -18.271 | -3.901 | -0.072 | 1.00 | 0.00 | H   |
| ATOM | 74  | HE1  | HIS | A | 6  | -19.411 | -7.801 | 0.993  | 1.00 | 0.00 | H   |
| ATOM | 75  | HE2  | HIS | A | 6  | -20.032 | -5.593 | -0.267 | 1.00 | 0.00 | H   |
| ATOM | 76  | N    | ASP | A | 7  | -13.271 | -5.103 | -0.852 | 1.00 | 0.00 | N   |
| ATOM | 77  | CA   | ASP | A | 7  | -12.959 | -4.883 | -2.279 | 1.00 | 0.00 | C   |
| ATOM | 78  | C    | ASP | A | 7  | -11.461 | -4.747 | -2.569 | 1.00 | 0.00 | C   |
| ATOM | 79  | O    | ASP | A | 7  | -10.802 | -3.922 | -1.959 | 1.00 | 0.00 | O   |
| ATOM | 80  | CB   | ASP | A | 7  | -13.598 | -3.589 | -2.762 | 1.00 | 0.00 | C   |
| ATOM | 81  | CG   | ASP | A | 7  | -13.381 | -3.213 | -4.224 | 1.00 | 0.00 | C   |
| ATOM | 82  | OD1  | ASP | A | 7  | -13.603 | -4.132 | -5.036 | 1.00 | 0.00 | O   |
| ATOM | 83  | OD2  | ASP | A | 7  | -12.911 | -2.094 | -4.531 | 1.00 | 0.00 | O1- |
| ATOM | 84  | H    | ASP | A | 7  | -12.494 | -5.124 | -0.225 | 1.00 | 0.00 | H   |
| ATOM | 85  | N    | SER | A | 8  | -11.096 | -5.199 | -3.775 | 1.00 | 0.00 | N   |
| ATOM | 86  | CA   | SER | A | 8  | -9.774  | -5.070 | -4.397 | 1.00 | 0.00 | C   |
| ATOM | 87  | C    | SER | A | 8  | -9.281  | -3.650 | -4.673 | 1.00 | 0.00 | C   |
| ATOM | 88  | O    | SER | A | 8  | -8.205  | -3.305 | -4.181 | 1.00 | 0.00 | O   |
| ATOM | 89  | CB   | SER | A | 8  | -9.572  | -5.996 | -5.606 | 1.00 | 0.00 | C   |
| ATOM | 90  | OG   | SER | A | 8  | -8.172  | -6.191 | -5.818 | 1.00 | 0.00 | O   |
| ATOM | 91  | H    | SER | A | 8  | -11.841 | -5.469 | -4.375 | 1.00 | 0.00 | H   |
| ATOM | 92  | HG   | SER | A | 8  | -7.985  | -5.603 | -6.613 | 1.00 | 0.00 | H   |
| ATOM | 93  | N    | GLY | A | 9  | -10.145 | -2.716 | -5.075 | 1.00 | 0.00 | N   |
| ATOM | 94  | CA   | GLY | A | 9  | -9.850  | -1.278 | -5.120 | 1.00 | 0.00 | C   |
| ATOM | 95  | C    | GLY | A | 9  | -9.738  | -0.616 | -3.742 | 1.00 | 0.00 | C   |
| ATOM | 96  | O    | GLY | A | 9  | -8.882  | 0.242  | -3.574 | 1.00 | 0.00 | O   |
| ATOM | 97  | H    | GLY | A | 9  | -10.833 | -3.016 | -5.728 | 1.00 | 0.00 | H   |
| ATOM | 98  | N    | TYR | A | 10 | -10.451 | -1.076 | -2.718 | 1.00 | 0.00 | N   |
| ATOM | 99  | CA   | TYR | A | 10 | -10.266 | -0.639 | -1.319 | 1.00 | 0.00 | C   |
| ATOM | 100 | C    | TYR | A | 10 | -9.042  | -1.340 | -0.705 | 1.00 | 0.00 | C   |
| ATOM | 101 | O    | TYR | A | 10 | -8.219  | -0.605 | -0.174 | 1.00 | 0.00 | O   |
| ATOM | 102 | CB   | TYR | A | 10 | -11.532 | -0.766 | -0.473 | 1.00 | 0.00 | C   |
| ATOM | 103 | CG   | TYR | A | 10 | -12.337 | 0.523  | -0.564 | 1.00 | 0.00 | C   |
| ATOM | 104 | CD1  | TYR | A | 10 | -13.182 | 0.756  | -1.646 | 1.00 | 0.00 | C   |
| ATOM | 105 | CD2  | TYR | A | 10 | -12.153 | 1.545  | 0.362  | 1.00 | 0.00 | C   |
| ATOM | 106 | CE1  | TYR | A | 10 | -13.958 | 1.896  | -1.695 | 1.00 | 0.00 | C   |
| ATOM | 107 | CE2  | TYR | A | 10 | -12.721 | 2.795  | 0.149  | 1.00 | 0.00 | C   |
| ATOM | 108 | CZ   | TYR | A | 10 | -13.632 | 2.976  | -0.878 | 1.00 | 0.00 | C   |
| ATOM | 109 | OH   | TYR | A | 10 | -14.231 | 4.175  | -1.132 | 1.00 | 0.00 | O   |
| ATOM | 110 | H    | TYR | A | 10 | -11.251 | -1.647 | -2.891 | 1.00 | 0.00 | H   |
| ATOM | 111 | HD1  | TYR | A | 10 | -13.173 | 0.109  | -2.526 | 1.00 | 0.00 | H   |
| ATOM | 112 | HD2  | TYR | A | 10 | -11.399 | 1.541  | 1.153  | 1.00 | 0.00 | H   |
| ATOM | 113 | HE1  | TYR | A | 10 | -14.870 | 1.834  | -2.292 | 1.00 | 0.00 | H   |
| ATOM | 114 | HE2  | TYR | A | 10 | -12.745 | 3.518  | 0.975  | 1.00 | 0.00 | H   |
| ATOM | 115 | HH   | TYR | A | 10 | -13.923 | 4.883  | -0.495 | 1.00 | 0.00 | H   |
| ATOM | 116 | N    | GLU | A | 11 | -8.751  | -2.606 | -0.978 | 1.00 | 0.00 | N   |
| ATOM | 117 | CA   | GLU | A | 11 | -7.481  | -3.190 | -0.545 | 1.00 | 0.00 | C   |
| ATOM | 118 | C    | GLU | A | 11 | -6.291  | -2.463 | -1.177 | 1.00 | 0.00 | C   |
| ATOM | 119 | O    | GLU | A | 11 | -5.311  | -2.325 | -0.453 | 1.00 | 0.00 | O   |
| ATOM | 120 | CB   | GLU | A | 11 | -7.417  | -4.556 | -1.239 | 1.00 | 0.00 | C   |
| ATOM | 121 | CG   | GLU | A | 11 | -8.158  | -5.620 | -0.423 | 1.00 | 0.00 | C   |
| ATOM | 122 | CD   | GLU | A | 11 | -7.951  | -7.057 | -0.918 | 1.00 | 0.00 | C   |
| ATOM | 123 | OE1  | GLU | A | 11 | -8.900  | -7.696 | -1.417 | 1.00 | 0.00 | O   |

|      |     |      |     |   |    |         |        |        |      |      |     |
|------|-----|------|-----|---|----|---------|--------|--------|------|------|-----|
| ATOM | 124 | OE2  | GLU | A | 11 | -6.788  | -7.491 | -0.820 | 1.00 | 0.00 | O1- |
| ATOM | 125 | H    | GLU | A | 11 | -9.402  | -3.183 | -1.483 | 1.00 | 0.00 | H   |
| ATOM | 126 | N    | VAL | A | 12 | -6.383  | -2.020 | -2.422 | 1.00 | 0.00 | N   |
| ATOM | 127 | CA   | VAL | A | 12 | -5.295  | -1.237 | -3.040 | 1.00 | 0.00 | C   |
| ATOM | 128 | C    | VAL | A | 12 | -5.222  | 0.226  | -2.583 | 1.00 | 0.00 | C   |
| ATOM | 129 | O    | VAL | A | 12 | -4.143  | 0.606  | -2.141 | 1.00 | 0.00 | O   |
| ATOM | 130 | CB   | VAL | A | 12 | -5.345  | -1.313 | -4.564 | 1.00 | 0.00 | C   |
| ATOM | 131 | CG1  | VAL | A | 12 | -3.989  | -0.895 | -5.138 | 1.00 | 0.00 | C   |
| ATOM | 132 | CG2  | VAL | A | 12 | -5.632  | -2.699 | -5.135 | 1.00 | 0.00 | C   |
| ATOM | 133 | H    | VAL | A | 12 | -6.973  | -2.462 | -3.100 | 1.00 | 0.00 | H   |
| ATOM | 134 | N    | HIS | A | 13 | -6.377  | 0.819  | -2.306 | 1.00 | 0.00 | N   |
| ATOM | 135 | CA   | HIS | A | 13 | -6.329  | 1.981  | -1.406 | 1.00 | 0.00 | C   |
| ATOM | 136 | C    | HIS | A | 13 | -5.566  | 1.904  | -0.076 | 1.00 | 0.00 | C   |
| ATOM | 137 | O    | HIS | A | 13 | -4.635  | 2.669  | 0.157  | 1.00 | 0.00 | O   |
| ATOM | 138 | CB   | HIS | A | 13 | -7.641  | 2.717  | -1.135 | 1.00 | 0.00 | C   |
| ATOM | 139 | CG   | HIS | A | 13 | -8.204  | 3.455  | -2.352 | 1.00 | 0.00 | C   |
| ATOM | 140 | CD2  | HIS | A | 13 | -9.391  | 3.185  | -2.888 | 1.00 | 0.00 | C   |
| ATOM | 141 | ND1  | HIS | A | 13 | -7.562  | 4.309  | -3.141 | 1.00 | 0.00 | N   |
| ATOM | 142 | CE1  | HIS | A | 13 | -8.359  | 4.654  | -4.149 | 1.00 | 0.00 | C   |
| ATOM | 143 | NE2  | HIS | A | 13 | -9.493  | 3.984  | -3.955 | 1.00 | 0.00 | N   |
| ATOM | 144 | H    | HIS | A | 13 | -7.268  | 0.438  | -2.531 | 1.00 | 0.00 | H   |
| ATOM | 145 | HD2  | HIS | A | 13 | -10.215 | 2.559  | -2.551 | 1.00 | 0.00 | H   |
| ATOM | 146 | HE1  | HIS | A | 13 | -8.283  | 5.532  | -4.789 | 1.00 | 0.00 | H   |
| ATOM | 147 | HE2  | HIS | A | 13 | -10.345 | 4.093  | -4.457 | 1.00 | 0.00 | H   |
| ATOM | 148 | N    | HIS | A | 14 | -5.927  | 0.856  | 0.666  | 1.00 | 0.00 | N   |
| ATOM | 149 | CA   | HIS | A | 14 | -5.194  | 0.563  | 1.905  | 1.00 | 0.00 | C   |
| ATOM | 150 | C    | HIS | A | 14 | -3.696  | 0.323  | 1.707  | 1.00 | 0.00 | C   |
| ATOM | 151 | O    | HIS | A | 14 | -2.805  | 0.911  | 2.330  | 1.00 | 0.00 | O   |
| ATOM | 152 | CB   | HIS | A | 14 | -5.665  | -0.704 | 2.622  | 1.00 | 0.00 | C   |
| ATOM | 153 | CG   | HIS | A | 14 | -5.108  | -0.855 | 4.033  | 1.00 | 0.00 | C   |
| ATOM | 154 | CD2  | HIS | A | 14 | -4.101  | -1.653 | 4.411  | 1.00 | 0.00 | C   |
| ATOM | 155 | ND1  | HIS | A | 14 | -5.543  | -0.234 | 5.123  | 1.00 | 0.00 | N   |
| ATOM | 156 | CE1  | HIS | A | 14 | -4.811  | -0.597 | 6.169  | 1.00 | 0.00 | C   |
| ATOM | 157 | NE2  | HIS | A | 14 | -3.964  | -1.523 | 5.727  | 1.00 | 0.00 | N   |
| ATOM | 158 | H    | HIS | A | 14 | -6.764  | 0.415  | 0.338  | 1.00 | 0.00 | H   |
| ATOM | 159 | HD2  | HIS | A | 14 | -3.673  | -2.390 | 3.736  | 1.00 | 0.00 | H   |
| ATOM | 160 | HE1  | HIS | A | 14 | -4.841  | -0.251 | 7.199  | 1.00 | 0.00 | H   |
| ATOM | 161 | HE2  | HIS | A | 14 | -3.230  | -1.980 | 6.229  | 1.00 | 0.00 | H   |
| ATOM | 162 | N    | GLN | A | 15 | -3.412  | -0.562 | 0.756  | 1.00 | 0.00 | N   |
| ATOM | 163 | CA   | GLN | A | 15 | -2.062  | -0.862 | 0.248  | 1.00 | 0.00 | C   |
| ATOM | 164 | C    | GLN | A | 15 | -1.315  | 0.423  | -0.106 | 1.00 | 0.00 | C   |
| ATOM | 165 | O    | GLN | A | 15 | -0.204  | 0.714  | 0.329  | 1.00 | 0.00 | O   |
| ATOM | 166 | CB   | GLN | A | 15 | -1.968  | -1.704 | -1.024 | 1.00 | 0.00 | C   |
| ATOM | 167 | CG   | GLN | A | 15 | -1.752  | -3.212 | -0.922 | 1.00 | 0.00 | C   |
| ATOM | 168 | CD   | GLN | A | 15 | -1.905  | -3.913 | -2.269 | 1.00 | 0.00 | C   |
| ATOM | 169 | NE2  | GLN | A | 15 | -2.998  | -4.686 | -2.245 | 1.00 | 0.00 | N   |
| ATOM | 170 | OE1  | GLN | A | 15 | -1.043  | -4.052 | -3.135 | 1.00 | 0.00 | O   |
| ATOM | 171 | H    | GLN | A | 15 | -4.099  | -1.221 | 0.453  | 1.00 | 0.00 | H   |
| ATOM | 172 | 1HE2 | GLN | A | 15 | -3.579  | -4.890 | -1.457 | 1.00 | 0.00 | H   |
| ATOM | 173 | 2HE2 | GLN | A | 15 | -3.167  | -5.167 | -3.099 | 1.00 | 0.00 | H   |
| ATOM | 174 | N    | LYS | A | 16 | -1.879  | 1.315  | -0.918 | 1.00 | 0.00 | N   |
| ATOM | 175 | CA   | LYS | A | 16 | -1.359  | 2.655  | -1.230 | 1.00 | 0.00 | C   |
| ATOM | 176 | C    | LYS | A | 16 | -1.119  | 3.554  | -0.019 | 1.00 | 0.00 | C   |
| ATOM | 177 | O    | LYS | A | 16 | -0.017  | 4.108  | 0.017  | 1.00 | 0.00 | O   |
| ATOM | 178 | CB   | LYS | A | 16 | -2.275  | 3.438  | -2.179 | 1.00 | 0.00 | C   |
| ATOM | 179 | CG   | LYS | A | 16 | -2.153  | 2.946  | -3.619 | 1.00 | 0.00 | C   |
| ATOM | 180 | CD   | LYS | A | 16 | -3.024  | 3.805  | -4.534 | 1.00 | 0.00 | C   |
| ATOM | 181 | CE   | LYS | A | 16 | -4.487  | 3.875  | -4.090 | 1.00 | 0.00 | C   |
| ATOM | 182 | NZ   | LYS | A | 16 | -5.480  | 4.082  | -5.149 | 1.00 | 0.00 | N1+ |
| ATOM | 183 | H    | LYS | A | 16 | -2.538  | 1.042  | -1.621 | 1.00 | 0.00 | H   |
| ATOM | 184 | HZ1  | LYS | A | 16 | -5.311  | 4.945  | -5.615 | 1.00 | 0.00 | H   |
| ATOM | 185 | HZ2  | LYS | A | 16 | -5.413  | 3.348  | -5.828 | 1.00 | 0.00 | H   |
| ATOM | 186 | HZ3  | LYS | A | 16 | -6.411  | 4.136  | -4.776 | 1.00 | 0.00 | H   |
| ATOM | 187 | N    | LEU | A | 17 | -1.964  | 3.547  | 1.013  | 1.00 | 0.00 | N   |
| ATOM | 188 | CA   | LEU | A | 17 | -1.722  | 4.201  | 2.304  | 1.00 | 0.00 | C   |
| ATOM | 189 | C    | LEU | A | 17 | -0.536  | 3.639  | 3.096  | 1.00 | 0.00 | C   |
| ATOM | 190 | O    | LEU | A | 17 | 0.194   | 4.402  | 3.719  | 1.00 | 0.00 | O   |
| ATOM | 191 | CB   | LEU | A | 17 | -3.011  | 4.247  | 3.121  | 1.00 | 0.00 | C   |

|      |     |     |     |   |    |        |        |        |      |      |     |
|------|-----|-----|-----|---|----|--------|--------|--------|------|------|-----|
| ATOM | 192 | CG  | LEU | A | 17 | -4.054 | 5.159  | 2.479  | 1.00 | 0.00 | C   |
| ATOM | 193 | CD1 | LEU | A | 17 | -5.354 | 4.775  | 3.202  | 1.00 | 0.00 | C   |
| ATOM | 194 | CD2 | LEU | A | 17 | -3.819 | 6.660  | 2.639  | 1.00 | 0.00 | C   |
| ATOM | 195 | H   | LEU | A | 17 | -2.862 | 3.190  | 0.777  | 1.00 | 0.00 | H   |
| ATOM | 196 | N   | VAL | A | 18 | -0.361 | 2.322  | 3.041  | 1.00 | 0.00 | N   |
| ATOM | 197 | CA  | VAL | A | 18 | 0.780  | 1.569  | 3.596  | 1.00 | 0.00 | C   |
| ATOM | 198 | C   | VAL | A | 18 | 2.169  | 1.921  | 3.050  | 1.00 | 0.00 | C   |
| ATOM | 199 | O   | VAL | A | 18 | 3.159  | 2.217  | 3.709  | 1.00 | 0.00 | O   |
| ATOM | 200 | CB  | VAL | A | 18 | 0.618  | 0.052  | 3.698  | 1.00 | 0.00 | C   |
| ATOM | 201 | CG1 | VAL | A | 18 | 1.678  | -0.588 | 4.581  | 1.00 | 0.00 | C   |
| ATOM | 202 | CG2 | VAL | A | 18 | -0.576 | -0.132 | 4.638  | 1.00 | 0.00 | C   |
| ATOM | 203 | H   | VAL | A | 18 | -1.116 | 1.758  | 2.708  | 1.00 | 0.00 | H   |
| ATOM | 204 | N   | PHE | A | 19 | 2.126  | 2.134  | 1.741  | 1.00 | 0.00 | N   |
| ATOM | 205 | CA  | PHE | A | 19 | 3.252  | 2.725  | 1.009  | 1.00 | 0.00 | C   |
| ATOM | 206 | C   | PHE | A | 19 | 3.536  | 4.125  | 1.542  | 1.00 | 0.00 | C   |
| ATOM | 207 | O   | PHE | A | 19 | 4.679  | 4.381  | 1.930  | 1.00 | 0.00 | O   |
| ATOM | 208 | CB  | PHE | A | 19 | 2.908  | 2.705  | -0.483 | 1.00 | 0.00 | C   |
| ATOM | 209 | CG  | PHE | A | 19 | 4.127  | 3.189  | -1.267 | 1.00 | 0.00 | C   |
| ATOM | 210 | CD1 | PHE | A | 19 | 5.134  | 2.300  | -1.624 | 1.00 | 0.00 | C   |
| ATOM | 211 | CD2 | PHE | A | 19 | 4.190  | 4.533  | -1.640 | 1.00 | 0.00 | C   |
| ATOM | 212 | CE1 | PHE | A | 19 | 6.159  | 2.732  | -2.450 | 1.00 | 0.00 | C   |
| ATOM | 213 | CE2 | PHE | A | 19 | 5.219  | 4.953  | -2.460 | 1.00 | 0.00 | C   |
| ATOM | 214 | CZ  | PHE | A | 19 | 6.237  | 4.076  | -2.798 | 1.00 | 0.00 | C   |
| ATOM | 215 | H   | PHE | A | 19 | 1.276  | 2.052  | 1.221  | 1.00 | 0.00 | H   |
| ATOM | 216 | HD1 | PHE | A | 19 | 4.964  | 1.229  | -1.523 | 1.00 | 0.00 | H   |
| ATOM | 217 | HD2 | PHE | A | 19 | 3.435  | 5.226  | -1.280 | 1.00 | 0.00 | H   |
| ATOM | 218 | HE1 | PHE | A | 19 | 6.980  | 2.019  | -2.427 | 1.00 | 0.00 | H   |
| ATOM | 219 | HE2 | PHE | A | 19 | 5.259  | 6.015  | -2.730 | 1.00 | 0.00 | H   |
| ATOM | 220 | HZ  | PHE | A | 19 | 7.167  | 4.465  | -3.219 | 1.00 | 0.00 | H   |
| ATOM | 221 | N   | PHE | A | 20 | 2.565  | 5.035  | 1.395  | 1.00 | 0.00 | N   |
| ATOM | 222 | CA  | PHE | A | 20 | 2.613  | 6.411  | 1.906  | 1.00 | 0.00 | C   |
| ATOM | 223 | C   | PHE | A | 20 | 2.870  | 6.763  | 3.373  | 1.00 | 0.00 | C   |
| ATOM | 224 | O   | PHE | A | 20 | 3.296  | 7.915  | 3.517  | 1.00 | 0.00 | O   |
| ATOM | 225 | CB  | PHE | A | 20 | 1.431  | 7.200  | 1.352  | 1.00 | 0.00 | C   |
| ATOM | 226 | CG  | PHE | A | 20 | 1.426  | 7.769  | -0.065 | 1.00 | 0.00 | C   |
| ATOM | 227 | CD1 | PHE | A | 20 | 2.390  | 8.737  | -0.358 | 1.00 | 0.00 | C   |
| ATOM | 228 | CD2 | PHE | A | 20 | 0.639  | 7.151  | -1.028 | 1.00 | 0.00 | C   |
| ATOM | 229 | CE1 | PHE | A | 20 | 2.565  | 9.014  | -1.707 | 1.00 | 0.00 | C   |
| ATOM | 230 | CE2 | PHE | A | 20 | 0.829  | 7.380  | -2.388 | 1.00 | 0.00 | C   |
| ATOM | 231 | CZ  | PHE | A | 20 | 1.780  | 8.355  | -2.656 | 1.00 | 0.00 | C   |
| ATOM | 232 | H   | PHE | A | 20 | 1.717  | 4.784  | 0.925  | 1.00 | 0.00 | H   |
| ATOM | 233 | HD1 | PHE | A | 20 | 3.059  | 9.068  | 0.432  | 1.00 | 0.00 | H   |
| ATOM | 234 | HD2 | PHE | A | 20 | -0.184 | 6.552  | -0.665 | 1.00 | 0.00 | H   |
| ATOM | 235 | HE1 | PHE | A | 20 | 3.001  | 9.973  | -2.008 | 1.00 | 0.00 | H   |
| ATOM | 236 | HE2 | PHE | A | 20 | 0.344  | 6.800  | -3.177 | 1.00 | 0.00 | H   |
| ATOM | 237 | HZ  | PHE | A | 20 | 2.016  | 8.723  | -3.657 | 1.00 | 0.00 | H   |
| ATOM | 238 | N   | ALA | A | 21 | 2.695  | 5.741  | 4.209  | 1.00 | 0.00 | N   |
| ATOM | 239 | CA  | ALA | A | 21 | 2.993  | 5.936  | 5.636  | 1.00 | 0.00 | C   |
| ATOM | 240 | C   | ALA | A | 21 | 4.441  | 5.625  | 6.038  | 1.00 | 0.00 | C   |
| ATOM | 241 | O   | ALA | A | 21 | 4.943  | 6.408  | 6.842  | 1.00 | 0.00 | O   |
| ATOM | 242 | CB  | ALA | A | 21 | 1.973  | 5.220  | 6.522  | 1.00 | 0.00 | C   |
| ATOM | 243 | H   | ALA | A | 21 | 2.055  | 5.013  | 3.990  | 1.00 | 0.00 | H   |
| ATOM | 244 | N   | GLU | A | 22 | 4.980  | 4.451  | 5.733  | 1.00 | 0.00 | N   |
| ATOM | 245 | CA  | GLU | A | 22 | 6.350  | 4.126  | 6.141  | 1.00 | 0.00 | C   |
| ATOM | 246 | C   | GLU | A | 22 | 7.355  | 4.985  | 5.370  | 1.00 | 0.00 | C   |
| ATOM | 247 | O   | GLU | A | 22 | 7.259  | 5.504  | 4.264  | 1.00 | 0.00 | O   |
| ATOM | 248 | CB  | GLU | A | 22 | 6.604  | 2.622  | 6.261  | 1.00 | 0.00 | C   |
| ATOM | 249 | CG  | GLU | A | 22 | 5.456  | 1.881  | 6.959  | 1.00 | 0.00 | C   |
| ATOM | 250 | CD  | GLU | A | 22 | 5.329  | 1.931  | 8.491  | 1.00 | 0.00 | C   |
| ATOM | 251 | OE1 | GLU | A | 22 | 5.649  | 3.034  | 8.981  | 1.00 | 0.00 | O   |
| ATOM | 252 | OE2 | GLU | A | 22 | 4.815  | 0.994  | 9.132  | 1.00 | 0.00 | O1- |
| ATOM | 253 | H   | GLU | A | 22 | 4.547  | 3.820  | 5.083  | 1.00 | 0.00 | H   |
| ATOM | 254 | N   | ASP | A | 23 | 8.384  | 5.359  | 6.140  | 1.00 | 0.00 | N   |
| ATOM | 255 | CA  | ASP | A | 23 | 9.400  | 6.358  | 5.792  | 1.00 | 0.00 | C   |
| ATOM | 256 | C   | ASP | A | 23 | 10.176 | 6.099  | 4.492  | 1.00 | 0.00 | C   |
| ATOM | 257 | O   | ASP | A | 23 | 10.435 | 4.952  | 4.127  | 1.00 | 0.00 | O   |
| ATOM | 258 | CB  | ASP | A | 23 | 10.311 | 6.561  | 7.002  | 1.00 | 0.00 | C   |
| ATOM | 259 | CG  | ASP | A | 23 | 10.865 | 5.273  | 7.612  | 1.00 | 0.00 | C   |

|      |     |      |     |   |    |        |        |        |      |      |     |
|------|-----|------|-----|---|----|--------|--------|--------|------|------|-----|
| ATOM | 260 | OD1  | ASP | A | 23 | 10.311 | 4.902  | 8.658  | 1.00 | 0.00 | O   |
| ATOM | 261 | OD2  | ASP | A | 23 | 11.888 | 4.742  | 7.111  | 1.00 | 0.00 | O1- |
| ATOM | 262 | H    | ASP | A | 23 | 8.477  | 4.959  | 7.046  | 1.00 | 0.00 | H   |
| ATOM | 263 | N    | VAL | A | 24 | 10.829 | 7.171  | 4.062  | 1.00 | 0.00 | N   |
| ATOM | 264 | CA   | VAL | A | 24 | 11.580 | 7.148  | 2.787  | 1.00 | 0.00 | C   |
| ATOM | 265 | C    | VAL | A | 24 | 12.593 | 6.022  | 2.617  | 1.00 | 0.00 | C   |
| ATOM | 266 | O    | VAL | A | 24 | 12.252 | 5.214  | 1.754  | 1.00 | 0.00 | O   |
| ATOM | 267 | CB   | VAL | A | 24 | 12.290 | 8.457  | 2.441  | 1.00 | 0.00 | C   |
| ATOM | 268 | CG1  | VAL | A | 24 | 11.182 | 9.461  | 2.108  | 1.00 | 0.00 | C   |
| ATOM | 269 | CG2  | VAL | A | 24 | 13.314 | 8.975  | 3.453  | 1.00 | 0.00 | C   |
| ATOM | 270 | H    | VAL | A | 24 | 10.842 | 7.926  | 4.717  | 1.00 | 0.00 | H   |
| ATOM | 271 | N    | GLY | A | 25 | 13.324 | 5.655  | 3.672  | 1.00 | 0.00 | N   |
| ATOM | 272 | CA   | GLY | A | 25 | 14.270 | 4.541  | 3.791  | 1.00 | 0.00 | C   |
| ATOM | 273 | C    | GLY | A | 25 | 13.474 | 3.229  | 3.842  | 1.00 | 0.00 | C   |
| ATOM | 274 | O    | GLY | A | 25 | 13.841 | 2.418  | 2.985  | 1.00 | 0.00 | O   |
| ATOM | 275 | H    | GLY | A | 25 | 13.199 | 6.190  | 4.501  | 1.00 | 0.00 | H   |
| ATOM | 276 | N    | SER | A | 26 | 12.489 | 3.077  | 4.714  | 1.00 | 0.00 | N   |
| ATOM | 277 | CA   | SER | A | 26 | 11.710 | 1.824  | 4.707  | 1.00 | 0.00 | C   |
| ATOM | 278 | C    | SER | A | 26 | 10.954 | 1.598  | 3.393  | 1.00 | 0.00 | C   |
| ATOM | 279 | O    | SER | A | 26 | 11.283 | 0.628  | 2.710  | 1.00 | 0.00 | O   |
| ATOM | 280 | CB   | SER | A | 26 | 10.824 | 1.669  | 5.940  | 1.00 | 0.00 | C   |
| ATOM | 281 | OG   | SER | A | 26 | 11.544 | 1.998  | 7.132  | 1.00 | 0.00 | O   |
| ATOM | 282 | H    | SER | A | 26 | 12.334 | 3.713  | 5.466  | 1.00 | 0.00 | H   |
| ATOM | 283 | HG   | SER | A | 26 | 11.340 | 2.910  | 7.486  | 1.00 | 0.00 | H   |
| ATOM | 284 | N    | ASN | A | 27 | 10.395 | 2.671  | 2.843  | 1.00 | 0.00 | N   |
| ATOM | 285 | CA   | ASN | A | 27 | 9.744  | 2.723  | 1.527  | 1.00 | 0.00 | C   |
| ATOM | 286 | C    | ASN | A | 27 | 10.681 | 2.381  | 0.364  | 1.00 | 0.00 | C   |
| ATOM | 287 | O    | ASN | A | 27 | 10.644 | 1.291  | -0.215 | 1.00 | 0.00 | O   |
| ATOM | 288 | CB   | ASN | A | 27 | 9.227  | 4.145  | 1.306  | 1.00 | 0.00 | C   |
| ATOM | 289 | CG   | ASN | A | 27 | 8.365  | 4.280  | 0.047  | 1.00 | 0.00 | C   |
| ATOM | 290 | ND2  | ASN | A | 27 | 7.054  | 4.304  | 0.230  | 1.00 | 0.00 | N   |
| ATOM | 291 | OD1  | ASN | A | 27 | 8.852  | 4.453  | -1.074 | 1.00 | 0.00 | O   |
| ATOM | 292 | H    | ASN | A | 27 | 10.290 | 3.510  | 3.366  | 1.00 | 0.00 | H   |
| ATOM | 293 | 1HD2 | ASN | A | 27 | 6.579  | 4.305  | 1.102  | 1.00 | 0.00 | H   |
| ATOM | 294 | 2HD2 | ASN | A | 27 | 6.544  | 4.190  | -0.632 | 1.00 | 0.00 | H   |
| ATOM | 295 | N    | LYS | A | 28 | 11.744 | 3.156  | 0.202  | 1.00 | 0.00 | N   |
| ATOM | 296 | CA   | LYS | A | 28 | 12.832 | 2.965  | -0.772 | 1.00 | 0.00 | C   |
| ATOM | 297 | C    | LYS | A | 28 | 13.929 | 1.971  | -0.391 | 1.00 | 0.00 | C   |
| ATOM | 298 | O    | LYS | A | 28 | 15.126 | 2.158  | -0.561 | 1.00 | 0.00 | O   |
| ATOM | 299 | CB   | LYS | A | 28 | 13.439 | 4.301  | -1.187 | 1.00 | 0.00 | C   |
| ATOM | 300 | CG   | LYS | A | 28 | 12.430 | 5.410  | -1.476 | 1.00 | 0.00 | C   |
| ATOM | 301 | CD   | LYS | A | 28 | 13.018 | 6.819  | -1.495 | 1.00 | 0.00 | C   |
| ATOM | 302 | CE   | LYS | A | 28 | 13.776 | 7.265  | -2.746 | 1.00 | 0.00 | C   |
| ATOM | 303 | NZ   | LYS | A | 28 | 14.125 | 8.686  | -2.792 | 1.00 | 0.00 | N1+ |
| ATOM | 304 | H    | LYS | A | 28 | 11.930 | 3.978  | 0.746  | 1.00 | 0.00 | H   |
| ATOM | 305 | HZ1  | LYS | A | 28 | 13.470 | 9.211  | -2.243 | 1.00 | 0.00 | H   |
| ATOM | 306 | HZ2  | LYS | A | 28 | 15.053 | 8.812  | -2.443 | 1.00 | 0.00 | H   |
| ATOM | 307 | HZ3  | LYS | A | 28 | 14.054 | 9.058  | -3.720 | 1.00 | 0.00 | H   |
| ATOM | 308 | N    | GLY | A | 29 | 13.522 | 0.944  | 0.355  | 1.00 | 0.00 | N   |
| ATOM | 309 | CA   | GLY | A | 29 | 14.365 | -0.162 | 0.837  | 1.00 | 0.00 | C   |
| ATOM | 310 | C    | GLY | A | 29 | 13.587 | -1.428 | 1.218  | 1.00 | 0.00 | C   |
| ATOM | 311 | O    | GLY | A | 29 | 13.449 | -2.457 | 0.554  | 1.00 | 0.00 | O   |
| ATOM | 312 | H    | GLY | A | 29 | 12.617 | 0.984  | 0.770  | 1.00 | 0.00 | H   |
| ATOM | 313 | N    | ALA | A | 30 | 13.233 | -1.510 | 2.494  | 1.00 | 0.00 | N   |
| ATOM | 314 | CA   | ALA | A | 30 | 12.275 | -2.519 | 2.981  | 1.00 | 0.00 | C   |
| ATOM | 315 | C    | ALA | A | 30 | 11.003 | -2.790 | 2.173  | 1.00 | 0.00 | C   |
| ATOM | 316 | O    | ALA | A | 30 | 10.892 | -3.855 | 1.573  | 1.00 | 0.00 | O   |
| ATOM | 317 | CB   | ALA | A | 30 | 11.923 | -2.307 | 4.451  | 1.00 | 0.00 | C   |
| ATOM | 318 | H    | ALA | A | 30 | 13.775 | -1.112 | 3.233  | 1.00 | 0.00 | H   |
| ATOM | 319 | N    | ILE | A | 31 | 10.285 | -1.719 | 1.837  | 1.00 | 0.00 | N   |
| ATOM | 320 | CA   | ILE | A | 31 | 9.071  | -1.867 | 1.031  | 1.00 | 0.00 | C   |
| ATOM | 321 | C    | ILE | A | 31 | 9.312  | -2.459 | -0.353 | 1.00 | 0.00 | C   |
| ATOM | 322 | O    | ILE | A | 31 | 8.738  | -3.449 | -0.832 | 1.00 | 0.00 | O   |
| ATOM | 323 | CB   | ILE | A | 31 | 8.125  | -0.659 | 1.015  | 1.00 | 0.00 | C   |
| ATOM | 324 | CG1  | ILE | A | 31 | 7.618  | -0.541 | 2.451  | 1.00 | 0.00 | C   |
| ATOM | 325 | CG2  | ILE | A | 31 | 6.915  | -0.741 | 0.085  | 1.00 | 0.00 | C   |
| ATOM | 326 | CD   | ILE | A | 31 | 6.812  | 0.699  | 2.832  | 1.00 | 0.00 | C   |
| ATOM | 327 | H    | ILE | A | 31 | 10.460 | -0.826 | 2.257  | 1.00 | 0.00 | H   |

|      |     |     |     |   |    |        |        |         |      |      |   |
|------|-----|-----|-----|---|----|--------|--------|---------|------|------|---|
| ATOM | 328 | N   | ILE | A | 32 | 10.173 | -1.813 | -1.128  | 1.00 | 0.00 | N |
| ATOM | 329 | CA  | ILE | A | 32 | 10.560 | -2.363 | -2.426  | 1.00 | 0.00 | C |
| ATOM | 330 | C   | ILE | A | 32 | 11.516 | -3.557 | -2.515  | 1.00 | 0.00 | C |
| ATOM | 331 | O   | ILE | A | 32 | 11.635 | -4.177 | -3.569  | 1.00 | 0.00 | O |
| ATOM | 332 | CB  | ILE | A | 32 | 10.935 | -1.279 | -3.440  | 1.00 | 0.00 | C |
| ATOM | 333 | CG1 | ILE | A | 32 | 11.967 | -0.264 | -2.943  | 1.00 | 0.00 | C |
| ATOM | 334 | CG2 | ILE | A | 32 | 9.691  | -0.576 | -4.001  | 1.00 | 0.00 | C |
| ATOM | 335 | CD  | ILE | A | 32 | 13.407 | -0.778 | -3.051  | 1.00 | 0.00 | C |
| ATOM | 336 | H   | ILE | A | 32 | 10.298 | -0.828 | -1.030  | 1.00 | 0.00 | H |
| ATOM | 337 | N   | GLY | A | 33 | 12.042 | -3.902 | -1.341  | 1.00 | 0.00 | N |
| ATOM | 338 | CA  | GLY | A | 33 | 12.886 | -5.088 | -1.171  | 1.00 | 0.00 | C |
| ATOM | 339 | C   | GLY | A | 33 | 12.098 | -6.401 | -1.108  | 1.00 | 0.00 | C |
| ATOM | 340 | O   | GLY | A | 33 | 12.400 | -7.387 | -1.791  | 1.00 | 0.00 | O |
| ATOM | 341 | H   | GLY | A | 33 | 12.107 | -3.245 | -0.582  | 1.00 | 0.00 | H |
| ATOM | 342 | N   | LEU | A | 34 | 10.973 | -6.268 | -0.405  | 1.00 | 0.00 | N |
| ATOM | 343 | CA  | LEU | A | 34 | 9.989  | -7.328 | -0.162  | 1.00 | 0.00 | C |
| ATOM | 344 | C   | LEU | A | 34 | 8.786  | -7.315 | -1.099  | 1.00 | 0.00 | C |
| ATOM | 345 | O   | LEU | A | 34 | 8.484  | -8.268 | -1.827  | 1.00 | 0.00 | O |
| ATOM | 346 | CB  | LEU | A | 34 | 9.508  | -7.226 | 1.292   | 1.00 | 0.00 | C |
| ATOM | 347 | CG  | LEU | A | 34 | 10.535 | -7.690 | 2.327   | 1.00 | 0.00 | C |
| ATOM | 348 | CD1 | LEU | A | 34 | 9.997  | -7.427 | 3.730   | 1.00 | 0.00 | C |
| ATOM | 349 | CD2 | LEU | A | 34 | 10.618 | -9.211 | 2.178   | 1.00 | 0.00 | C |
| ATOM | 350 | H   | LEU | A | 34 | 10.723 | -5.391 | -0.007  | 1.00 | 0.00 | H |
| ATOM | 351 | N   | MET | A | 35 | 8.291  | -6.115 | -1.384  | 1.00 | 0.00 | N |
| ATOM | 352 | CA  | MET | A | 35 | 7.047  | -5.945 | -2.158  | 1.00 | 0.00 | C |
| ATOM | 353 | C   | MET | A | 35 | 7.239  | -5.902 | -3.668  | 1.00 | 0.00 | C |
| ATOM | 354 | O   | MET | A | 35 | 8.045  | -5.105 | -4.170  | 1.00 | 0.00 | O |
| ATOM | 355 | CB  | MET | A | 35 | 6.123  | -4.862 | -1.579  | 1.00 | 0.00 | C |
| ATOM | 356 | CG  | MET | A | 35 | 4.886  | -4.567 | -2.435  | 1.00 | 0.00 | C |
| ATOM | 357 | SD  | MET | A | 35 | 3.863  | -6.058 | -2.709  | 1.00 | 0.00 | S |
| ATOM | 358 | CE  | MET | A | 35 | 2.594  | -5.390 | -3.753  | 1.00 | 0.00 | C |
| ATOM | 359 | H   | MET | A | 35 | 8.836  | -5.278 | -1.326  | 1.00 | 0.00 | H |
| ATOM | 360 | N   | VAL | A | 36 | 6.536  | -6.793 | -4.363  | 1.00 | 0.00 | N |
| ATOM | 361 | CA  | VAL | A | 36 | 6.493  | -7.019 | -5.815  | 1.00 | 0.00 | C |
| ATOM | 362 | C   | VAL | A | 36 | 5.823  | -5.938 | -6.670  | 1.00 | 0.00 | C |
| ATOM | 363 | O   | VAL | A | 36 | 4.818  | -5.418 | -6.206  | 1.00 | 0.00 | O |
| ATOM | 364 | CB  | VAL | A | 36 | 5.840  | -8.354 | -6.185  | 1.00 | 0.00 | C |
| ATOM | 365 | CG1 | VAL | A | 36 | 6.800  | -9.526 | -5.935  | 1.00 | 0.00 | C |
| ATOM | 366 | CG2 | VAL | A | 36 | 4.493  | -8.645 | -5.512  | 1.00 | 0.00 | C |
| ATOM | 367 | H   | VAL | A | 36 | 6.300  | -7.656 | -3.906  | 1.00 | 0.00 | H |
| ATOM | 368 | N   | GLY | A | 37 | 6.289  | -5.804 | -7.904  | 1.00 | 0.00 | N |
| ATOM | 369 | CA  | GLY | A | 37 | 5.816  | -4.916 | -8.987  | 1.00 | 0.00 | C |
| ATOM | 370 | C   | GLY | A | 37 | 6.205  | -3.474 | -8.667  | 1.00 | 0.00 | C |
| ATOM | 371 | O   | GLY | A | 37 | 6.733  | -3.135 | -7.599  | 1.00 | 0.00 | O |
| ATOM | 372 | H   | GLY | A | 37 | 6.999  | -6.484 | -8.094  | 1.00 | 0.00 | H |
| ATOM | 373 | N   | GLY | A | 38 | 6.166  | -2.667 | -9.721  | 1.00 | 0.00 | N |
| ATOM | 374 | CA  | GLY | A | 38 | 6.284  | -1.209 | -9.599  | 1.00 | 0.00 | C |
| ATOM | 375 | C   | GLY | A | 38 | 5.064  | -0.556 | -8.939  | 1.00 | 0.00 | C |
| ATOM | 376 | O   | GLY | A | 38 | 3.951  | -1.066 | -9.034  | 1.00 | 0.00 | O |
| ATOM | 377 | H   | GLY | A | 38 | 6.318  | -3.006 | -10.651 | 1.00 | 0.00 | H |
| ATOM | 378 | N   | VAL | A | 39 | 5.315  | 0.528  | -8.209  | 1.00 | 0.00 | N |
| ATOM | 379 | CA  | VAL | A | 39 | 4.283  | 1.112  | -7.344  | 1.00 | 0.00 | C |
| ATOM | 380 | C   | VAL | A | 39 | 3.237  | 1.873  | -8.164  | 1.00 | 0.00 | C |
| ATOM | 381 | O   | VAL | A | 39 | 3.662  | 2.811  | -8.850  | 1.00 | 0.00 | O |
| ATOM | 382 | CB  | VAL | A | 39 | 4.869  | 1.938  | -6.191  | 1.00 | 0.00 | C |
| ATOM | 383 | CG1 | VAL | A | 39 | 4.959  | 1.045  | -4.948  | 1.00 | 0.00 | C |
| ATOM | 384 | CG2 | VAL | A | 39 | 6.004  | 2.893  | -6.557  | 1.00 | 0.00 | C |
| ATOM | 385 | H   | VAL | A | 39 | 6.203  | 0.792  | -7.830  | 1.00 | 0.00 | H |
| ATOM | 386 | N   | VAL | A | 40 | 1.986  | 1.440  | -8.171  | 1.00 | 0.00 | N |
| ATOM | 387 | CA  | VAL | A | 40 | 0.964  | 2.205  | -8.907  | 1.00 | 0.00 | C |
| ATOM | 388 | C   | VAL | A | 40 | 0.388  | 3.462  | -8.260  | 1.00 | 0.00 | C |
| ATOM | 389 | O   | VAL | A | 40 | -0.821 | 3.709  | -8.221  | 1.00 | 0.00 | O |
| ATOM | 390 | CB  | VAL | A | 40 | -0.096 | 1.297  | -9.523  | 1.00 | 0.00 | C |
| ATOM | 391 | CG1 | VAL | A | 40 | 0.425  | 0.677  | -10.815 | 1.00 | 0.00 | C |
| ATOM | 392 | CG2 | VAL | A | 40 | -0.621 | 0.282  | -8.506  | 1.00 | 0.00 | C |
| ATOM | 393 | H   | VAL | A | 40 | 1.765  | 0.533  | -7.825  | 1.00 | 0.00 | H |
| ATOM | 394 | N   | ILE | A | 41 | 1.318  | 4.229  | -7.710  | 1.00 | 0.00 | N |
| ATOM | 395 | CA  | ILE | A | 41 | 0.911  | 5.406  | -6.921  | 1.00 | 0.00 | C |

|      |     |     |     |   |    |        |        |        |      |      |   |
|------|-----|-----|-----|---|----|--------|--------|--------|------|------|---|
| ATOM | 396 | C   | ILE | A | 41 | 0.198  | 6.513  | -7.690 | 1.00 | 0.00 | C |
| ATOM | 397 | O   | ILE | A | 41 | 0.731  | 6.839  | -8.750 | 1.00 | 0.00 | O |
| ATOM | 398 | CB  | ILE | A | 41 | 1.994  | 5.902  | -5.946 | 1.00 | 0.00 | C |
| ATOM | 399 | CG1 | ILE | A | 41 | 3.345  | 6.132  | -6.615 | 1.00 | 0.00 | C |
| ATOM | 400 | CG2 | ILE | A | 41 | 1.997  | 4.990  | -4.725 | 1.00 | 0.00 | C |
| ATOM | 401 | CD  | ILE | A | 41 | 4.265  | 6.771  | -5.567 | 1.00 | 0.00 | C |
| ATOM | 402 | H   | ILE | A | 41 | 2.300  | 4.193  | -7.932 | 1.00 | 0.00 | H |
| ATOM | 403 | N   | ALA | A | 42 | -1.091 | 6.629  | -7.368 | 1.00 | 0.00 | N |
| ATOM | 404 | CA  | ALA | A | 42 | -2.046 | 7.587  | -7.929 | 1.00 | 0.00 | C |
| ATOM | 405 | C   | ALA | A | 42 | -3.423 | 7.347  | -7.302 | 1.00 | 0.00 | C |
| ATOM | 406 | CB  | ALA | A | 42 | -2.309 | 7.366  | -9.420 | 1.00 | 0.00 | C |
| ATOM | 407 | O1  | ALA | A | 42 | -4.395 | 8.104  | -7.504 | 1.00 | 0.00 | O |
| ATOM | 408 | O2  | ALA | A | 42 | -3.562 | 6.540  | -6.363 | 1.00 | 0.00 | O |
| ATOM | 409 | H   | ALA | A | 42 | -1.538 | 5.898  | -6.851 | 1.00 | 0.00 | H |
| ATOM | 410 | C1  | 6n  | B | 43 | 2.829  | -3.620 | 1.431  | 1.00 | 0.00 | C |
| ATOM | 411 | N1  | 6n  | B | 43 | 2.703  | -1.456 | -2.617 | 1.00 | 0.00 | N |
| ATOM | 412 | O1  | 6n  | B | 43 | 2.451  | -4.153 | 3.832  | 1.00 | 0.00 | O |
| ATOM | 413 | C2  | 6n  | B | 43 | 2.194  | -2.285 | 0.947  | 1.00 | 0.00 | C |
| ATOM | 414 | N2  | 6n  | B | 43 | 3.822  | -0.997 | -2.005 | 1.00 | 0.00 | N |
| ATOM | 415 | O2  | 6n  | B | 43 | 0.684  | -4.081 | 2.462  | 1.00 | 0.00 | O |
| ATOM | 416 | C3  | 6n  | B | 43 | 2.547  | -1.832 | -0.412 | 1.00 | 0.00 | C |
| ATOM | 417 | N3  | 6n  | B | 43 | 3.785  | -1.227 | -0.772 | 1.00 | 0.00 | N |
| ATOM | 418 | O3  | 6n  | B | 43 | 2.052  | -6.657 | -0.088 | 1.00 | 0.00 | O |
| ATOM | 419 | C4  | 6n  | B | 43 | 1.846  | -1.952 | -1.630 | 1.00 | 0.00 | C |
| ATOM | 420 | N4  | 6n  | B | 43 | 6.557  | -5.134 | 3.854  | 1.00 | 0.00 | N |
| ATOM | 421 | C5  | 6n  | B | 43 | 2.455  | -1.607 | -4.014 | 1.00 | 0.00 | C |
| ATOM | 422 | N5  | 6n  | B | 43 | 7.119  | -5.175 | 2.611  | 1.00 | 0.00 | N |
| ATOM | 423 | C6  | 6n  | B | 43 | 3.379  | -2.334 | -4.786 | 1.00 | 0.00 | C |
| ATOM | 424 | N6  | 6n  | B | 43 | 6.365  | -4.646 | 1.760  | 1.00 | 0.00 | N |
| ATOM | 425 | C7  | 6n  | B | 43 | 3.055  | -2.798 | -6.059 | 1.00 | 0.00 | C |
| ATOM | 426 | N7  | 6n  | B | 43 | 2.688  | -4.721 | 0.517  | 1.00 | 0.00 | N |
| ATOM | 427 | C8  | 6n  | B | 43 | 1.802  | -2.449 | -6.563 | 1.00 | 0.00 | C |
| ATOM | 428 | C9  | 6n  | B | 43 | 0.866  | -1.757 | -5.811 | 1.00 | 0.00 | C |
| ATOM | 429 | C10 | 6n  | B | 43 | 1.197  | -1.273 | -4.549 | 1.00 | 0.00 | C |
| ATOM | 430 | C11 | 6n  | B | 43 | 0.557  | 0.051  | -4.125 | 1.00 | 0.00 | C |
| ATOM | 431 | C12 | 6n  | B | 43 | 2.015  | -3.932 | 2.698  | 1.00 | 0.00 | C |
| ATOM | 432 | C13 | 6n  | B | 43 | -0.171 | -4.495 | 3.524  | 1.00 | 0.00 | C |
| ATOM | 433 | C14 | 6n  | B | 43 | -1.609 | -4.041 | 3.421  | 1.00 | 0.00 | C |
| ATOM | 434 | C15 | 6n  | B | 43 | 4.279  | -3.180 | 1.831  | 1.00 | 0.00 | C |
| ATOM | 435 | C16 | 6n  | B | 43 | 5.240  | -4.092 | 2.472  | 1.00 | 0.00 | C |
| ATOM | 436 | C17 | 6n  | B | 43 | 5.369  | -4.389 | 3.842  | 1.00 | 0.00 | C |
| ATOM | 437 | C18 | 6n  | B | 43 | 7.117  | -5.759 | 5.003  | 1.00 | 0.00 | C |
| ATOM | 438 | C19 | 6n  | B | 43 | 7.789  | -4.931 | 5.921  | 1.00 | 0.00 | C |
| ATOM | 439 | C20 | 6n  | B | 43 | 8.241  | -5.425 | 7.133  | 1.00 | 0.00 | C |
| ATOM | 440 | C21 | 6n  | B | 43 | 8.068  | -6.785 | 7.381  | 1.00 | 0.00 | C |
| ATOM | 441 | C22 | 6n  | B | 43 | 7.461  | -7.642 | 6.480  | 1.00 | 0.00 | C |
| ATOM | 442 | C23 | 6n  | B | 43 | 6.961  | -7.137 | 5.289  | 1.00 | 0.00 | C |
| ATOM | 443 | C24 | 6n  | B | 43 | 8.370  | -3.578 | 5.488  | 1.00 | 0.00 | C |
| ATOM | 444 | C25 | 6n  | B | 43 | 2.787  | -6.083 | 0.755  | 1.00 | 0.00 | C |
| ATOM | 445 | C26 | 6n  | B | 43 | 3.337  | -6.769 | 1.974  | 1.00 | 0.00 | C |
| ATOM | 446 | F1  | 6n  | B | 43 | 0.492  | 0.442  | -2.807 | 1.00 | 0.00 | F |
| ATOM | 447 | F2  | 6n  | B | 43 | 1.128  | 1.221  | -4.583 | 1.00 | 0.00 | F |
| ATOM | 448 | F3  | 6n  | B | 43 | -0.762 | 0.271  | -4.477 | 1.00 | 0.00 | F |
| ATOM | 449 | F4  | 6n  | B | 43 | 9.045  | -3.588 | 4.278  | 1.00 | 0.00 | F |
| ATOM | 450 | F5  | 6n  | B | 43 | 7.482  | -2.539 | 5.305  | 1.00 | 0.00 | F |
| ATOM | 451 | F6  | 6n  | B | 43 | 9.229  | -2.837 | 6.263  | 1.00 | 0.00 | F |
| ATOM | 452 | H1  | 6n  | B | 43 | 2.353  | -4.493 | -0.397 | 1.00 | 0.00 | H |
| ATOM | 453 | H03 | 6n  | B | 43 | 0.906  | -2.473 | -1.831 | 1.00 | 0.00 | H |
| ATOM | 454 | H04 | 6n  | B | 43 | 4.384  | -2.496 | -4.380 | 1.00 | 0.00 | H |
| ATOM | 455 | H05 | 6n  | B | 43 | 3.703  | -3.470 | -6.626 | 1.00 | 0.00 | H |
| ATOM | 456 | H06 | 6n  | B | 43 | 1.642  | -2.540 | -7.647 | 1.00 | 0.00 | H |
| ATOM | 457 | H07 | 6n  | B | 43 | -0.134 | -1.555 | -6.218 | 1.00 | 0.00 | H |
| ATOM | 458 | H11 | 6n  | B | 43 | 4.962  | -3.965 | 4.757  | 1.00 | 0.00 | H |
| ATOM | 459 | H12 | 6n  | B | 43 | 8.646  | -4.665 | 7.822  | 1.00 | 0.00 | H |
| ATOM | 460 | H13 | 6n  | B | 43 | 8.586  | -7.191 | 8.274  | 1.00 | 0.00 | H |
| ATOM | 461 | H14 | 6n  | B | 43 | 7.489  | -8.740 | 6.549  | 1.00 | 0.00 | H |
| ATOM | 462 | H15 | 6n  | B | 43 | 6.263  | -7.747 | 4.704  | 1.00 | 0.00 | H |
| END  |     |     |     |   |    |        |        |        |      |      |   |

### 3. A $\beta$ <sub>42</sub> protofibril

|      |    |     |     |   |    |         |        |        |      |      |   |
|------|----|-----|-----|---|----|---------|--------|--------|------|------|---|
| ATOM | 1  | N   | LEU | A | 17 | -15.562 | -0.631 | 7.381  | 1.00 | 0.00 | N |
| ATOM | 2  | CA  | LEU | A | 17 | -14.456 | -0.708 | 6.409  | 1.00 | 0.00 | C |
| ATOM | 3  | C   | LEU | A | 17 | -13.193 | -1.132 | 7.159  | 1.00 | 0.00 | C |
| ATOM | 4  | O   | LEU | A | 17 | -12.999 | -0.561 | 8.231  | 1.00 | 0.00 | O |
| ATOM | 5  | CB  | LEU | A | 17 | -14.306 | 0.630  | 5.671  | 1.00 | 0.00 | C |
| ATOM | 6  | CG  | LEU | A | 17 | -14.255 | 0.463  | 4.145  | 1.00 | 0.00 | C |
| ATOM | 7  | CD1 | LEU | A | 17 | -14.645 | 1.753  | 3.432  | 1.00 | 0.00 | C |
| ATOM | 8  | CD2 | LEU | A | 17 | -12.866 | 0.015  | 3.708  | 1.00 | 0.00 | C |
| ATOM | 9  | H1  | LEU | A | 17 | -16.353 | -1.028 | 6.914  | 1.00 | 0.00 | H |
| ATOM | 10 | H2  | LEU | A | 17 | -15.357 | -1.223 | 8.160  | 1.00 | 0.00 | H |
| ATOM | 11 | H3  | LEU | A | 17 | -15.747 | 0.311  | 7.667  | 1.00 | 0.00 | H |
| ATOM | 12 | N   | VAL | A | 18 | -12.197 | -1.810 | 6.600  | 1.00 | 0.00 | N |
| ATOM | 13 | CA  | VAL | A | 18 | -11.005 | -2.392 | 7.228  | 1.00 | 0.00 | C |
| ATOM | 14 | C   | VAL | A | 18 | -9.785  | -2.044 | 6.381  | 1.00 | 0.00 | C |
| ATOM | 15 | O   | VAL | A | 18 | -9.914  | -2.184 | 5.159  | 1.00 | 0.00 | O |
| ATOM | 16 | CB  | VAL | A | 18 | -11.045 | -3.919 | 7.345  | 1.00 | 0.00 | C |
| ATOM | 17 | CG1 | VAL | A | 18 | -10.021 | -4.460 | 8.346  | 1.00 | 0.00 | C |
| ATOM | 18 | CG2 | VAL | A | 18 | -12.470 | -4.375 | 7.668  | 1.00 | 0.00 | C |
| ATOM | 19 | H   | VAL | A | 18 | -12.055 | -1.959 | 5.627  | 1.00 | 0.00 | H |
| ATOM | 20 | N   | PHE | A | 19 | -8.837  | -1.343 | 7.003  | 1.00 | 0.00 | N |
| ATOM | 21 | CA  | PHE | A | 19 | -7.595  | -0.953 | 6.310  | 1.00 | 0.00 | C |
| ATOM | 22 | C   | PHE | A | 19 | -6.342  | -1.603 | 6.897  | 1.00 | 0.00 | C |
| ATOM | 23 | O   | PHE | A | 19 | -6.138  | -1.481 | 8.109  | 1.00 | 0.00 | O |
| ATOM | 24 | CB  | PHE | A | 19 | -7.346  | 0.549  | 6.364  | 1.00 | 0.00 | C |
| ATOM | 25 | CG  | PHE | A | 19 | -8.341  | 1.480  | 5.680  | 1.00 | 0.00 | C |
| ATOM | 26 | CD1 | PHE | A | 19 | -9.377  | 1.909  | 6.517  | 1.00 | 0.00 | C |
| ATOM | 27 | CD2 | PHE | A | 19 | -8.559  | 1.556  | 4.312  | 1.00 | 0.00 | C |
| ATOM | 28 | CE1 | PHE | A | 19 | -10.511 | 2.472  | 5.952  | 1.00 | 0.00 | C |
| ATOM | 29 | CE2 | PHE | A | 19 | -9.730  | 2.130  | 3.848  | 1.00 | 0.00 | C |
| ATOM | 30 | CZ  | PHE | A | 19 | -10.793 | 2.622  | 4.603  | 1.00 | 0.00 | C |
| ATOM | 31 | H   | PHE | A | 19 | -8.965  | -0.859 | 7.866  | 1.00 | 0.00 | H |
| ATOM | 32 | HD1 | PHE | A | 19 | -9.479  | 1.514  | 7.524  | 1.00 | 0.00 | H |
| ATOM | 33 | HD2 | PHE | A | 19 | -7.781  | 1.293  | 3.585  | 1.00 | 0.00 | H |
| ATOM | 34 | HE1 | PHE | A | 19 | -11.203 | 2.878  | 6.693  | 1.00 | 0.00 | H |
| ATOM | 35 | HE2 | PHE | A | 19 | -9.912  | 1.995  | 2.779  | 1.00 | 0.00 | H |
| ATOM | 36 | HZ  | PHE | A | 19 | -11.544 | 3.320  | 4.217  | 1.00 | 0.00 | H |
| ATOM | 37 | N   | PHE | A | 20 | -5.555  | -2.453 | 6.232  | 1.00 | 0.00 | N |
| ATOM | 38 | CA  | PHE | A | 20 | -4.323  | -2.981 | 6.829  | 1.00 | 0.00 | C |
| ATOM | 39 | C   | PHE | A | 20 | -3.000  | -2.768 | 6.105  | 1.00 | 0.00 | C |
| ATOM | 40 | O   | PHE | A | 20 | -2.812  | -2.689 | 4.897  | 1.00 | 0.00 | O |
| ATOM | 41 | CB  | PHE | A | 20 | -4.490  | -4.479 | 7.138  | 1.00 | 0.00 | C |
| ATOM | 42 | CG  | PHE | A | 20 | -4.935  | -4.689 | 8.589  | 1.00 | 0.00 | C |
| ATOM | 43 | CD1 | PHE | A | 20 | -4.035  | -4.928 | 9.621  | 1.00 | 0.00 | C |
| ATOM | 44 | CD2 | PHE | A | 20 | -6.297  | -4.785 | 8.837  | 1.00 | 0.00 | C |
| ATOM | 45 | CE1 | PHE | A | 20 | -4.509  | -5.206 | 10.892 | 1.00 | 0.00 | C |
| ATOM | 46 | CE2 | PHE | A | 20 | -6.760  | -4.890 | 10.138 | 1.00 | 0.00 | C |
| ATOM | 47 | CZ  | PHE | A | 20 | -5.865  | -5.097 | 11.185 | 1.00 | 0.00 | C |
| ATOM | 48 | H   | PHE | A | 20 | -5.634  | -2.772 | 5.295  | 1.00 | 0.00 | H |
| ATOM | 49 | HD1 | PHE | A | 20 | -2.975  | -4.897 | 9.393  | 1.00 | 0.00 | H |
| ATOM | 50 | HD2 | PHE | A | 20 | -6.966  | -4.700 | 7.967  | 1.00 | 0.00 | H |
| ATOM | 51 | HE1 | PHE | A | 20 | -3.784  | -5.064 | 11.690 | 1.00 | 0.00 | H |
| ATOM | 52 | HE2 | PHE | A | 20 | -7.811  | -4.693 | 10.356 | 1.00 | 0.00 | H |
| ATOM | 53 | HZ  | PHE | A | 20 | -6.139  | -5.443 | 12.188 | 1.00 | 0.00 | H |
| ATOM | 54 | N   | ALA | A | 21 | -2.036  | -2.513 | 6.998  | 1.00 | 0.00 | N |
| ATOM | 55 | CA  | ALA | A | 21 | -0.706  | -2.157 | 6.492  | 1.00 | 0.00 | C |
| ATOM | 56 | C   | ALA | A | 21 | 0.376   | -3.012 | 7.160  | 1.00 | 0.00 | C |
| ATOM | 57 | O   | ALA | A | 21 | 0.725   | -2.758 | 8.314  | 1.00 | 0.00 | O |
| ATOM | 58 | CB  | ALA | A | 21 | -0.341  | -0.702 | 6.804  | 1.00 | 0.00 | C |
| ATOM | 59 | H   | ALA | A | 21 | -2.213  | -2.292 | 7.949  | 1.00 | 0.00 | H |
| ATOM | 60 | N   | GLU | A | 22 | 0.598   | -4.162 | 6.523  | 1.00 | 0.00 | N |
| ATOM | 61 | CA  | GLU | A | 22 | 1.544   | -5.167 | 7.008  | 1.00 | 0.00 | C |
| ATOM | 62 | C   | GLU | A | 22 | 2.958   | -4.945 | 6.473  | 1.00 | 0.00 | C |
| ATOM | 63 | O   | GLU | A | 22 | 3.306   | -5.168 | 5.314  | 1.00 | 0.00 | O |
| ATOM | 64 | CB  | GLU | A | 22 | 1.060   | -6.584 | 6.692  | 1.00 | 0.00 | C |

|      |     |      |     |   |    |        |         |        |      |      |     |
|------|-----|------|-----|---|----|--------|---------|--------|------|------|-----|
| ATOM | 65  | CG   | GLU | A | 22 | -0.135 | -6.759  | 7.620  | 1.00 | 0.00 | C   |
| ATOM | 66  | CD   | GLU | A | 22 | 0.224  | -7.456  | 8.941  | 1.00 | 0.00 | C   |
| ATOM | 67  | OE1  | GLU | A | 22 | 0.362  | -8.695  | 8.850  | 1.00 | 0.00 | O   |
| ATOM | 68  | OE2  | GLU | A | 22 | 0.358  | -6.883  | 10.035 | 1.00 | 0.00 | O1- |
| ATOM | 69  | H    | GLU | A | 22 | 0.233  | -4.356  | 5.613  | 1.00 | 0.00 | H   |
| ATOM | 70  | N    | ASP | A | 23 | 3.815  | -4.684  | 7.459  | 1.00 | 0.00 | N   |
| ATOM | 71  | CA   | ASP | A | 23 | 5.260  | -4.503  | 7.316  | 1.00 | 0.00 | C   |
| ATOM | 72  | C    | ASP | A | 23 | 6.014  | -5.777  | 7.712  | 1.00 | 0.00 | C   |
| ATOM | 73  | O    | ASP | A | 23 | 6.058  | -6.258  | 8.841  | 1.00 | 0.00 | O   |
| ATOM | 74  | CB   | ASP | A | 23 | 5.743  | -3.168  | 7.880  | 1.00 | 0.00 | C   |
| ATOM | 75  | CG   | ASP | A | 23 | 6.963  | -3.188  | 8.804  | 1.00 | 0.00 | C   |
| ATOM | 76  | OD1  | ASP | A | 23 | 6.790  | -3.063  | 10.037 | 1.00 | 0.00 | O   |
| ATOM | 77  | OD2  | ASP | A | 23 | 8.051  | -3.522  | 8.284  | 1.00 | 0.00 | O1- |
| ATOM | 78  | H    | ASP | A | 23 | 3.532  | -4.720  | 8.418  | 1.00 | 0.00 | H   |
| ATOM | 79  | N    | VAL | A | 24 | 6.526  | -6.460  | 6.700  | 1.00 | 0.00 | N   |
| ATOM | 80  | CA   | VAL | A | 24 | 7.422  | -7.627  | 6.718  | 1.00 | 0.00 | C   |
| ATOM | 81  | C    | VAL | A | 24 | 8.846  | -7.155  | 6.422  | 1.00 | 0.00 | C   |
| ATOM | 82  | O    | VAL | A | 24 | 9.245  | -6.985  | 5.274  | 1.00 | 0.00 | O   |
| ATOM | 83  | CB   | VAL | A | 24 | 6.933  | -8.643  | 5.671  | 1.00 | 0.00 | C   |
| ATOM | 84  | CG1  | VAL | A | 24 | 7.929  | -9.750  | 5.319  | 1.00 | 0.00 | C   |
| ATOM | 85  | CG2  | VAL | A | 24 | 5.618  | -9.260  | 6.141  | 1.00 | 0.00 | C   |
| ATOM | 86  | H    | VAL | A | 24 | 6.134  | -6.456  | 5.776  | 1.00 | 0.00 | H   |
| ATOM | 87  | N    | GLY | A | 25 | 9.640  | -6.868  | 7.457  | 1.00 | 0.00 | N   |
| ATOM | 88  | CA   | GLY | A | 25 | 10.943 | -6.204  | 7.273  | 1.00 | 0.00 | C   |
| ATOM | 89  | C    | GLY | A | 25 | 12.055 | -7.245  | 7.364  | 1.00 | 0.00 | C   |
| ATOM | 90  | O    | GLY | A | 25 | 12.872 | -7.292  | 8.284  | 1.00 | 0.00 | O   |
| ATOM | 91  | H    | GLY | A | 25 | 9.341  | -6.654  | 8.382  | 1.00 | 0.00 | H   |
| ATOM | 92  | N    | SER | A | 26 | 12.142 | -8.112  | 6.356  | 1.00 | 0.00 | N   |
| ATOM | 93  | CA   | SER | A | 26 | 13.188 | -9.143  | 6.396  | 1.00 | 0.00 | C   |
| ATOM | 94  | C    | SER | A | 26 | 14.602 | -8.563  | 6.447  | 1.00 | 0.00 | C   |
| ATOM | 95  | O    | SER | A | 26 | 14.843 | -7.497  | 5.888  | 1.00 | 0.00 | O   |
| ATOM | 96  | CB   | SER | A | 26 | 13.163 | -9.891  | 5.066  | 1.00 | 0.00 | C   |
| ATOM | 97  | OG   | SER | A | 26 | 11.930 | -10.584 | 4.816  | 1.00 | 0.00 | O   |
| ATOM | 98  | H    | SER | A | 26 | 11.874 | -7.901  | 5.412  | 1.00 | 0.00 | H   |
| ATOM | 99  | HG   | SER | A | 26 | 11.344 | -10.737 | 5.611  | 1.00 | 0.00 | H   |
| ATOM | 100 | N    | ASN | A | 27 | 15.316 | -9.220  | 7.356  | 1.00 | 0.00 | N   |
| ATOM | 101 | CA   | ASN | A | 27 | 16.708 | -8.955  | 7.768  | 1.00 | 0.00 | C   |
| ATOM | 102 | C    | ASN | A | 27 | 17.139 | -7.581  | 8.256  | 1.00 | 0.00 | C   |
| ATOM | 103 | O    | ASN | A | 27 | 17.784 | -7.536  | 9.306  | 1.00 | 0.00 | O   |
| ATOM | 104 | CB   | ASN | A | 27 | 17.730 | -9.431  | 6.726  | 1.00 | 0.00 | C   |
| ATOM | 105 | CG   | ASN | A | 27 | 17.590 | -10.929 | 6.455  | 1.00 | 0.00 | C   |
| ATOM | 106 | ND2  | ASN | A | 27 | 17.736 | -11.313 | 5.188  | 1.00 | 0.00 | N   |
| ATOM | 107 | OD1  | ASN | A | 27 | 17.417 | -11.747 | 7.365  | 1.00 | 0.00 | O   |
| ATOM | 108 | H    | ASN | A | 27 | 15.021 | -10.098 | 7.752  | 1.00 | 0.00 | H   |
| ATOM | 109 | 1HD2 | ASN | A | 27 | 18.034 | -10.661 | 4.496  | 1.00 | 0.00 | H   |
| ATOM | 110 | 2HD2 | ASN | A | 27 | 17.456 | -12.225 | 4.878  | 1.00 | 0.00 | H   |
| ATOM | 111 | N    | LYS | A | 28 | 16.676 | -6.449  | 7.724  | 1.00 | 0.00 | N   |
| ATOM | 112 | CA   | LYS | A | 28 | 16.841 | -5.133  | 8.352  | 1.00 | 0.00 | C   |
| ATOM | 113 | C    | LYS | A | 28 | 15.577 | -4.314  | 8.101  | 1.00 | 0.00 | C   |
| ATOM | 114 | O    | LYS | A | 28 | 15.032 | -4.256  | 6.999  | 1.00 | 0.00 | O   |
| ATOM | 115 | CB   | LYS | A | 28 | 18.126 | -4.567  | 7.739  | 1.00 | 0.00 | C   |
| ATOM | 116 | CG   | LYS | A | 28 | 18.464 | -3.201  | 8.343  | 1.00 | 0.00 | C   |
| ATOM | 117 | CD   | LYS | A | 28 | 19.113 | -2.309  | 7.274  | 1.00 | 0.00 | C   |
| ATOM | 118 | CE   | LYS | A | 28 | 19.506 | -0.905  | 7.737  | 1.00 | 0.00 | C   |
| ATOM | 119 | NZ   | LYS | A | 28 | 18.296 | -0.102  | 7.996  | 1.00 | 0.00 | N1+ |
| ATOM | 120 | H    | LYS | A | 28 | 16.129 | -6.459  | 6.888  | 1.00 | 0.00 | H   |
| ATOM | 121 | HZ1  | LYS | A | 28 | 17.623 | -0.664  | 8.489  | 1.00 | 0.00 | H   |
| ATOM | 122 | HZ2  | LYS | A | 28 | 18.606 | 0.671   | 8.552  | 1.00 | 0.00 | H   |
| ATOM | 123 | HZ3  | LYS | A | 28 | 17.871 | 0.219   | 7.149  | 1.00 | 0.00 | H   |
| ATOM | 124 | N    | GLY | A | 29 | 14.985 | -4.034  | 9.267  | 1.00 | 0.00 | N   |
| ATOM | 125 | CA   | GLY | A | 29 | 13.878 | -3.074  | 9.180  | 1.00 | 0.00 | C   |
| ATOM | 126 | C    | GLY | A | 29 | 14.357 | -1.630  | 8.994  | 1.00 | 0.00 | C   |
| ATOM | 127 | O    | GLY | A | 29 | 15.462 | -1.362  | 8.530  | 1.00 | 0.00 | O   |
| ATOM | 128 | H    | GLY | A | 29 | 15.104 | -4.583  | 10.091 | 1.00 | 0.00 | H   |
| ATOM | 129 | N    | ALA | A | 30 | 13.537 | -0.741  | 9.561  | 1.00 | 0.00 | N   |
| ATOM | 130 | CA   | ALA | A | 30 | 13.526 | 0.714   | 9.387  | 1.00 | 0.00 | C   |
| ATOM | 131 | C    | ALA | A | 30 | 12.651 | 1.349   | 10.468 | 1.00 | 0.00 | C   |
| ATOM | 132 | O    | ALA | A | 30 | 11.661 | 0.780   | 10.911 | 1.00 | 0.00 | O   |



|      |     |     |     |   |    |         |        |        |      |      |   |
|------|-----|-----|-----|---|----|---------|--------|--------|------|------|---|
| ATOM | 133 | CB  | ALA | A | 30 | 13.036  | 1.039  | 7.973  | 1.00 | 0.00 | C |
| ATOM | 134 | H   | ALA | A | 30 | 12.972  | -1.019 | 10.327 | 1.00 | 0.00 | H |
| ATOM | 135 | N   | ILE | A | 31 | 12.826  | 2.666  | 10.608 | 1.00 | 0.00 | N |
| ATOM | 136 | CA  | ILE | A | 31 | 12.254  | 3.390  | 11.746 | 1.00 | 0.00 | C |
| ATOM | 137 | C   | ILE | A | 31 | 10.738  | 3.542  | 11.558 | 1.00 | 0.00 | C |
| ATOM | 138 | O   | ILE | A | 31 | 10.317  | 4.196  | 10.602 | 1.00 | 0.00 | O |
| ATOM | 139 | CB  | ILE | A | 31 | 12.913  | 4.769  | 11.820 | 1.00 | 0.00 | C |
| ATOM | 140 | CG1 | ILE | A | 31 | 14.416  | 4.553  | 11.948 | 1.00 | 0.00 | C |
| ATOM | 141 | CG2 | ILE | A | 31 | 12.426  | 5.460  | 13.094 | 1.00 | 0.00 | C |
| ATOM | 142 | CD  | ILE | A | 31 | 15.230  | 5.850  | 11.972 | 1.00 | 0.00 | C |
| ATOM | 143 | H   | ILE | A | 31 | 13.314  | 3.166  | 9.897  | 1.00 | 0.00 | H |
| ATOM | 144 | N   | ILE | A | 32 | 10.006  | 2.951  | 12.495 | 1.00 | 0.00 | N |
| ATOM | 145 | CA  | ILE | A | 32 | 8.545   | 2.825  | 12.375 | 1.00 | 0.00 | C |
| ATOM | 146 | C   | ILE | A | 32 | 7.924   | 4.118  | 12.907 | 1.00 | 0.00 | C |
| ATOM | 147 | O   | ILE | A | 32 | 8.453   | 4.801  | 13.778 | 1.00 | 0.00 | O |
| ATOM | 148 | CB  | ILE | A | 32 | 8.124   | 1.618  | 13.219 | 1.00 | 0.00 | C |
| ATOM | 149 | CG1 | ILE | A | 32 | 8.498   | 0.297  | 12.557 | 1.00 | 0.00 | C |
| ATOM | 150 | CG2 | ILE | A | 32 | 6.627   | 1.613  | 13.546 | 1.00 | 0.00 | C |
| ATOM | 151 | CD  | ILE | A | 32 | 9.148   | -0.730 | 13.491 | 1.00 | 0.00 | C |
| ATOM | 152 | H   | ILE | A | 32 | 10.365  | 2.795  | 13.417 | 1.00 | 0.00 | H |
| ATOM | 153 | N   | GLY | A | 33 | 6.973   | 4.674  | 12.155 | 1.00 | 0.00 | N |
| ATOM | 154 | CA  | GLY | A | 33 | 5.998   | 5.693  | 12.572 | 1.00 | 0.00 | C |
| ATOM | 155 | C   | GLY | A | 33 | 4.553   | 5.434  | 12.140 | 1.00 | 0.00 | C |
| ATOM | 156 | O   | GLY | A | 33 | 4.260   | 5.589  | 10.953 | 1.00 | 0.00 | O |
| ATOM | 157 | H   | GLY | A | 33 | 6.999   | 4.541  | 11.162 | 1.00 | 0.00 | H |
| ATOM | 158 | N   | LEU | A | 34 | 3.762   | 4.948  | 13.091 | 1.00 | 0.00 | N |
| ATOM | 159 | CA  | LEU | A | 34 | 2.312   | 4.806  | 12.923 | 1.00 | 0.00 | C |
| ATOM | 160 | C   | LEU | A | 34 | 1.529   | 6.119  | 13.029 | 1.00 | 0.00 | C |
| ATOM | 161 | O   | LEU | A | 34 | 1.633   | 6.826  | 14.029 | 1.00 | 0.00 | O |
| ATOM | 162 | CB  | LEU | A | 34 | 1.787   | 3.844  | 13.990 | 1.00 | 0.00 | C |
| ATOM | 163 | CG  | LEU | A | 34 | 0.413   | 3.312  | 13.574 | 1.00 | 0.00 | C |
| ATOM | 164 | CD1 | LEU | A | 34 | 0.520   | 2.428  | 12.325 | 1.00 | 0.00 | C |
| ATOM | 165 | CD2 | LEU | A | 34 | -0.342  | 2.710  | 14.767 | 1.00 | 0.00 | C |
| ATOM | 166 | H   | LEU | A | 34 | 4.243   | 4.644  | 13.913 | 1.00 | 0.00 | H |
| ATOM | 167 | N   | MET | A | 35 | 1.018   | 6.404  | 11.825 | 1.00 | 0.00 | N |
| ATOM | 168 | CA  | MET | A | 35 | 0.123   | 7.519  | 11.502 | 1.00 | 0.00 | C |
| ATOM | 169 | C   | MET | A | 35 | -1.320  | 7.082  | 11.233 | 1.00 | 0.00 | C |
| ATOM | 170 | O   | MET | A | 35 | -1.622  | 6.494  | 10.187 | 1.00 | 0.00 | O |
| ATOM | 171 | CB  | MET | A | 35 | 0.671   | 8.311  | 10.321 | 1.00 | 0.00 | C |
| ATOM | 172 | CG  | MET | A | 35 | 2.101   | 8.738  | 10.663 | 1.00 | 0.00 | C |
| ATOM | 173 | SD  | MET | A | 35 | 2.935   | 9.637  | 9.304  | 1.00 | 0.00 | S |
| ATOM | 174 | CE  | MET | A | 35 | 4.436   | 10.110 | 10.143 | 1.00 | 0.00 | C |
| ATOM | 175 | H   | MET | A | 35 | 1.111   | 5.757  | 11.073 | 1.00 | 0.00 | H |
| ATOM | 176 | N   | VAL | A | 36 | -2.115  | 7.262  | 12.280 | 1.00 | 0.00 | N |
| ATOM | 177 | CA  | VAL | A | 36 | -3.539  | 6.896  | 12.222 | 1.00 | 0.00 | C |
| ATOM | 178 | C   | VAL | A | 36 | -4.514  | 7.808  | 11.469 | 1.00 | 0.00 | C |
| ATOM | 179 | O   | VAL | A | 36 | -4.609  | 9.013  | 11.676 | 1.00 | 0.00 | O |
| ATOM | 180 | CB  | VAL | A | 36 | -4.103  | 6.537  | 13.601 | 1.00 | 0.00 | C |
| ATOM | 181 | CG1 | VAL | A | 36 | -3.537  | 5.213  | 14.102 | 1.00 | 0.00 | C |
| ATOM | 182 | CG2 | VAL | A | 36 | -3.937  | 7.764  | 14.498 | 1.00 | 0.00 | C |
| ATOM | 183 | H   | VAL | A | 36 | -1.873  | 7.908  | 13.013 | 1.00 | 0.00 | H |
| ATOM | 184 | N   | GLY | A | 37 | -5.258  | 7.274  | 10.507 | 1.00 | 0.00 | N |
| ATOM | 185 | CA  | GLY | A | 37 | -6.266  | 8.113  | 9.839  | 1.00 | 0.00 | C |
| ATOM | 186 | C   | GLY | A | 37 | -7.650  | 7.555  | 10.190 | 1.00 | 0.00 | C |
| ATOM | 187 | O   | GLY | A | 37 | -8.085  | 6.467  | 9.814  | 1.00 | 0.00 | O |
| ATOM | 188 | H   | GLY | A | 37 | -5.156  | 6.360  | 10.116 | 1.00 | 0.00 | H |
| ATOM | 189 | N   | GLY | A | 38 | -8.459  | 8.362  | 10.873 | 1.00 | 0.00 | N |
| ATOM | 190 | CA  | GLY | A | 38 | -9.872  | 8.245  | 11.238 | 1.00 | 0.00 | C |
| ATOM | 191 | C   | GLY | A | 38 | -10.279 | 6.826  | 11.671 | 1.00 | 0.00 | C |
| ATOM | 192 | O   | GLY | A | 38 | -9.611  | 6.299  | 12.547 | 1.00 | 0.00 | O |
| ATOM | 193 | H   | GLY | A | 38 | -7.890  | 8.951  | 11.444 | 1.00 | 0.00 | H |
| ATOM | 194 | N   | VAL | A | 39 | -10.931 | 6.083  | 10.774 | 1.00 | 0.00 | N |
| ATOM | 195 | CA  | VAL | A | 39 | -11.216 | 4.656  | 11.022 | 1.00 | 0.00 | C |
| ATOM | 196 | C   | VAL | A | 39 | -10.180 | 3.735  | 10.383 | 1.00 | 0.00 | C |
| ATOM | 197 | O   | VAL | A | 39 | -9.913  | 3.831  | 9.191  | 1.00 | 0.00 | O |
| ATOM | 198 | CB  | VAL | A | 39 | -12.629 | 4.236  | 10.638 | 1.00 | 0.00 | C |
| ATOM | 199 | CG1 | VAL | A | 39 | -13.541 | 4.746  | 11.752 | 1.00 | 0.00 | C |
| ATOM | 200 | CG2 | VAL | A | 39 | -13.113 | 4.904  | 9.346  | 1.00 | 0.00 | C |

|      |     |     |     |   |    |         |        |        |      |      |   |
|------|-----|-----|-----|---|----|---------|--------|--------|------|------|---|
| ATOM | 201 | H   | VAL | A | 39 | -11.041 | 6.376  | 9.831  | 1.00 | 0.00 | H |
| ATOM | 202 | N   | VAL | A | 40 | -9.551  | 2.903  | 11.213 | 1.00 | 0.00 | N |
| ATOM | 203 | CA  | VAL | A | 40 | -8.535  | 1.930  | 10.776 | 1.00 | 0.00 | C |
| ATOM | 204 | C   | VAL | A | 40 | -9.240  | 0.566  | 10.660 | 1.00 | 0.00 | C |
| ATOM | 205 | O   | VAL | A | 40 | -9.407  | 0.103  | 9.527  | 1.00 | 0.00 | O |
| ATOM | 206 | CB  | VAL | A | 40 | -7.388  | 1.837  | 11.787 | 1.00 | 0.00 | C |
| ATOM | 207 | CG1 | VAL | A | 40 | -6.163  | 1.249  | 11.073 | 1.00 | 0.00 | C |
| ATOM | 208 | CG2 | VAL | A | 40 | -6.962  | 3.170  | 12.404 | 1.00 | 0.00 | C |
| ATOM | 209 | H   | VAL | A | 40 | -9.651  | 2.939  | 12.205 | 1.00 | 0.00 | H |
| ATOM | 210 | N   | ILE | A | 41 | -9.903  | 0.078  | 11.699 | 1.00 | 0.00 | N |
| ATOM | 211 | CA  | ILE | A | 41 | -10.593 | -1.220 | 11.703 | 1.00 | 0.00 | C |
| ATOM | 212 | C   | ILE | A | 41 | -12.029 | -0.952 | 12.173 | 1.00 | 0.00 | C |
| ATOM | 213 | O   | ILE | A | 41 | -12.298 | -0.873 | 13.365 | 1.00 | 0.00 | O |
| ATOM | 214 | CB  | ILE | A | 41 | -9.856  | -2.242 | 12.573 | 1.00 | 0.00 | C |
| ATOM | 215 | CG1 | ILE | A | 41 | -8.373  | -2.431 | 12.270 | 1.00 | 0.00 | C |
| ATOM | 216 | CG2 | ILE | A | 41 | -10.571 | -3.590 | 12.677 | 1.00 | 0.00 | C |
| ATOM | 217 | CD  | ILE | A | 41 | -7.628  | -3.195 | 13.368 | 1.00 | 0.00 | C |
| ATOM | 218 | H   | ILE | A | 41 | -10.109 | 0.722  | 12.435 | 1.00 | 0.00 | H |
| ATOM | 219 | N   | ALA | A | 42 | -12.943 | -1.004 | 11.202 | 1.00 | 0.00 | N |
| ATOM | 220 | CA  | ALA | A | 42 | -14.368 | -0.901 | 11.539 | 1.00 | 0.00 | C |
| ATOM | 221 | C   | ALA | A | 42 | -15.159 | -2.187 | 11.249 | 1.00 | 0.00 | C |
| ATOM | 222 | CB  | ALA | A | 42 | -14.933 | 0.252  | 10.702 | 1.00 | 0.00 | C |
| ATOM | 223 | O1  | ALA | A | 42 | -15.254 | -2.611 | 10.077 | 1.00 | 0.00 | O |
| ATOM | 224 | O2  | ALA | A | 42 | -15.990 | -2.474 | 12.135 | 1.00 | 0.00 | O |
| ATOM | 225 | H   | ALA | A | 42 | -12.690 | -1.250 | 10.263 | 1.00 | 0.00 | H |
| ATOM | 226 | N   | LEU | B | 17 | -15.951 | -4.016 | 1.649  | 1.00 | 0.00 | N |
| ATOM | 227 | CA  | LEU | B | 17 | -14.695 | -4.005 | 0.901  | 1.00 | 0.00 | C |
| ATOM | 228 | C   | LEU | B | 17 | -13.554 | -3.741 | 1.889  | 1.00 | 0.00 | C |
| ATOM | 229 | O   | LEU | B | 17 | -13.545 | -2.651 | 2.459  | 1.00 | 0.00 | O |
| ATOM | 230 | CB  | LEU | B | 17 | -14.813 | -2.933 | -0.189 | 1.00 | 0.00 | C |
| ATOM | 231 | CG  | LEU | B | 17 | -13.678 | -3.125 | -1.202 | 1.00 | 0.00 | C |
| ATOM | 232 | CD1 | LEU | B | 17 | -13.817 | -4.456 | -1.950 | 1.00 | 0.00 | C |
| ATOM | 233 | CD2 | LEU | B | 17 | -13.795 | -1.978 | -2.213 | 1.00 | 0.00 | C |
| ATOM | 234 | H1  | LEU | B | 17 | -15.870 | -4.514 | 2.516  | 1.00 | 0.00 | H |
| ATOM | 235 | H2  | LEU | B | 17 | -16.253 | -3.108 | 1.924  | 1.00 | 0.00 | H |
| ATOM | 236 | H3  | LEU | B | 17 | -16.718 | -4.397 | 1.128  | 1.00 | 0.00 | H |
| ATOM | 237 | N   | VAL | B | 18 | -12.631 | -4.691 | 1.999  | 1.00 | 0.00 | N |
| ATOM | 238 | CA  | VAL | B | 18 | -11.448 | -4.748 | 2.870  | 1.00 | 0.00 | C |
| ATOM | 239 | C   | VAL | B | 18 | -10.196 | -4.192 | 2.179  | 1.00 | 0.00 | C |
| ATOM | 240 | O   | VAL | B | 18 | -9.907  | -4.683 | 1.089  | 1.00 | 0.00 | O |
| ATOM | 241 | CB  | VAL | B | 18 | -11.178 | -6.208 | 3.271  | 1.00 | 0.00 | C |
| ATOM | 242 | CG1 | VAL | B | 18 | -9.888  | -6.253 | 4.096  | 1.00 | 0.00 | C |
| ATOM | 243 | CG2 | VAL | B | 18 | -12.248 | -6.795 | 4.187  | 1.00 | 0.00 | C |
| ATOM | 244 | H   | VAL | B | 18 | -12.702 | -5.420 | 1.317  | 1.00 | 0.00 | H |
| ATOM | 245 | N   | PHE | B | 19 | -9.436  | -3.259 | 2.735  | 1.00 | 0.00 | N |
| ATOM | 246 | CA  | PHE | B | 19 | -8.212  | -2.834 | 2.027  | 1.00 | 0.00 | C |
| ATOM | 247 | C   | PHE | B | 19 | -6.925  | -3.381 | 2.635  | 1.00 | 0.00 | C |
| ATOM | 248 | O   | PHE | B | 19 | -6.938  | -3.528 | 3.850  | 1.00 | 0.00 | O |
| ATOM | 249 | CB  | PHE | B | 19 | -8.183  | -1.320 | 1.851  | 1.00 | 0.00 | C |
| ATOM | 250 | CG  | PHE | B | 19 | -9.177  | -0.789 | 0.821  | 1.00 | 0.00 | C |
| ATOM | 251 | CD1 | PHE | B | 19 | -8.691  | 0.008  | -0.207 | 1.00 | 0.00 | C |
| ATOM | 252 | CD2 | PHE | B | 19 | -10.549 | -0.930 | 0.935  | 1.00 | 0.00 | C |
| ATOM | 253 | CE1 | PHE | B | 19 | -9.485  | 0.644  | -1.149 | 1.00 | 0.00 | C |
| ATOM | 254 | CE2 | PHE | B | 19 | -11.380 | -0.307 | 0.015  | 1.00 | 0.00 | C |
| ATOM | 255 | CZ  | PHE | B | 19 | -10.855 | 0.513  | -0.976 | 1.00 | 0.00 | C |
| ATOM | 256 | H   | PHE | B | 19 | -9.633  | -2.789 | 3.592  | 1.00 | 0.00 | H |
| ATOM | 257 | HD1 | PHE | B | 19 | -7.627  | 0.226  | -0.305 | 1.00 | 0.00 | H |
| ATOM | 258 | HD2 | PHE | B | 19 | -10.954 | -1.663 | 1.633  | 1.00 | 0.00 | H |
| ATOM | 259 | HE1 | PHE | B | 19 | -9.083  | 1.037  | -2.083 | 1.00 | 0.00 | H |
| ATOM | 260 | HE2 | PHE | B | 19 | -12.455 | -0.266 | 0.201  | 1.00 | 0.00 | H |
| ATOM | 261 | HZ  | PHE | B | 19 | -11.580 | 1.042  | -1.597 | 1.00 | 0.00 | H |
| ATOM | 262 | N   | PHE | B | 20 | -6.016  | -3.895 | 1.806  | 1.00 | 0.00 | N |
| ATOM | 263 | CA  | PHE | B | 20 | -4.837  | -4.510 | 2.440  | 1.00 | 0.00 | C |
| ATOM | 264 | C   | PHE | B | 20 | -3.604  | -4.177 | 1.605  | 1.00 | 0.00 | C |
| ATOM | 265 | O   | PHE | B | 20 | -3.554  | -4.243 | 0.376  | 1.00 | 0.00 | O |
| ATOM | 266 | CB  | PHE | B | 20 | -5.103  | -6.017 | 2.438  | 1.00 | 0.00 | C |
| ATOM | 267 | CG  | PHE | B | 20 | -4.707  | -6.563 | 3.813  | 1.00 | 0.00 | C |
| ATOM | 268 | CD1 | PHE | B | 20 | -3.359  | -6.707 | 4.115  | 1.00 | 0.00 | C |

|      |     |      |     |   |    |        |         |       |      |      |     |
|------|-----|------|-----|---|----|--------|---------|-------|------|------|-----|
| ATOM | 269 | CD2  | PHE | B | 20 | -5.666 | -7.179  | 4.618 | 1.00 | 0.00 | C   |
| ATOM | 270 | CE1  | PHE | B | 20 | -2.937 | -7.361  | 5.254 | 1.00 | 0.00 | C   |
| ATOM | 271 | CE2  | PHE | B | 20 | -5.238 | -7.947  | 5.686 | 1.00 | 0.00 | C   |
| ATOM | 272 | CZ   | PHE | B | 20 | -3.889 | -8.033  | 6.019 | 1.00 | 0.00 | C   |
| ATOM | 273 | H    | PHE | B | 20 | -6.284 | -4.330  | 0.946 | 1.00 | 0.00 | H   |
| ATOM | 274 | HD1  | PHE | B | 20 | -2.571 | -6.642  | 3.361 | 1.00 | 0.00 | H   |
| ATOM | 275 | HD2  | PHE | B | 20 | -6.680 | -7.225  | 4.218 | 1.00 | 0.00 | H   |
| ATOM | 276 | HE1  | PHE | B | 20 | -2.029 | -6.944  | 5.704 | 1.00 | 0.00 | H   |
| ATOM | 277 | HE2  | PHE | B | 20 | -5.977 | -8.596  | 6.166 | 1.00 | 0.00 | H   |
| ATOM | 278 | HZ   | PHE | B | 20 | -3.563 | -8.655  | 6.850 | 1.00 | 0.00 | H   |
| ATOM | 279 | N    | ALA | B | 21 | -2.616 | -3.702  | 2.368 | 1.00 | 0.00 | N   |
| ATOM | 280 | CA   | ALA | B | 21 | -1.250 | -3.410  | 1.933 | 1.00 | 0.00 | C   |
| ATOM | 281 | C    | ALA | B | 21 | -0.194 | -4.288  | 2.616 | 1.00 | 0.00 | C   |
| ATOM | 282 | O    | ALA | B | 21 | -0.117 | -4.301  | 3.846 | 1.00 | 0.00 | O   |
| ATOM | 283 | CB   | ALA | B | 21 | -0.879 | -1.952  | 2.194 | 1.00 | 0.00 | C   |
| ATOM | 284 | H    | ALA | B | 21 | -2.769 | -3.397  | 3.304 | 1.00 | 0.00 | H   |
| ATOM | 285 | N    | GLU | B | 22 | 0.309  | -5.275  | 1.892 | 1.00 | 0.00 | N   |
| ATOM | 286 | CA   | GLU | B | 22 | 1.460  | -6.067  | 2.365 | 1.00 | 0.00 | C   |
| ATOM | 287 | C    | GLU | B | 22 | 2.813  | -5.773  | 1.716 | 1.00 | 0.00 | C   |
| ATOM | 288 | O    | GLU | B | 22 | 3.081  | -6.115  | 0.560 | 1.00 | 0.00 | O   |
| ATOM | 289 | CB   | GLU | B | 22 | 1.236  | -7.572  | 2.209 | 1.00 | 0.00 | C   |
| ATOM | 290 | CG   | GLU | B | 22 | 0.160  | -7.923  | 3.245 | 1.00 | 0.00 | C   |
| ATOM | 291 | CD   | GLU | B | 22 | -0.090 | -9.402  | 3.573 | 1.00 | 0.00 | C   |
| ATOM | 292 | OE1  | GLU | B | 22 | -1.164 | -9.860  | 3.125 | 1.00 | 0.00 | O   |
| ATOM | 293 | OE2  | GLU | B | 22 | 0.456  | -9.888  | 4.588 | 1.00 | 0.00 | O1- |
| ATOM | 294 | H    | GLU | B | 22 | -0.075 | -5.677  | 1.059 | 1.00 | 0.00 | H   |
| ATOM | 295 | N    | ASP | B | 23 | 3.641  | -5.088  | 2.497 | 1.00 | 0.00 | N   |
| ATOM | 296 | CA   | ASP | B | 23 | 5.001  | -4.685  | 2.114 | 1.00 | 0.00 | C   |
| ATOM | 297 | C    | ASP | B | 23 | 6.014  | -5.795  | 2.393 | 1.00 | 0.00 | C   |
| ATOM | 298 | O    | ASP | B | 23 | 6.691  | -5.820  | 3.424 | 1.00 | 0.00 | O   |
| ATOM | 299 | CB   | ASP | B | 23 | 5.357  | -3.420  | 2.897 | 1.00 | 0.00 | C   |
| ATOM | 300 | CG   | ASP | B | 23 | 6.724  | -2.803  | 2.609 | 1.00 | 0.00 | C   |
| ATOM | 301 | OD1  | ASP | B | 23 | 6.733  | -1.588  | 2.882 | 1.00 | 0.00 | O   |
| ATOM | 302 | OD2  | ASP | B | 23 | 7.678  | -3.517  | 2.250 | 1.00 | 0.00 | O1- |
| ATOM | 303 | H    | ASP | B | 23 | 3.388  | -4.893  | 3.445 | 1.00 | 0.00 | H   |
| ATOM | 304 | N    | VAL | B | 24 | 6.129  | -6.771  | 1.505 | 1.00 | 0.00 | N   |
| ATOM | 305 | CA   | VAL | B | 24 | 7.101  | -7.871  | 1.650 | 1.00 | 0.00 | C   |
| ATOM | 306 | C    | VAL | B | 24 | 8.523  | -7.388  | 1.363 | 1.00 | 0.00 | C   |
| ATOM | 307 | O    | VAL | B | 24 | 8.971  | -7.586  | 0.238 | 1.00 | 0.00 | O   |
| ATOM | 308 | CB   | VAL | B | 24 | 6.542  | -9.036  | 0.835 | 1.00 | 0.00 | C   |
| ATOM | 309 | CG1  | VAL | B | 24 | 7.282  | -10.363 | 0.996 | 1.00 | 0.00 | C   |
| ATOM | 310 | CG2  | VAL | B | 24 | 5.068  | -9.361  | 1.075 | 1.00 | 0.00 | C   |
| ATOM | 311 | H    | VAL | B | 24 | 5.554  | -6.795  | 0.682 | 1.00 | 0.00 | H   |
| ATOM | 312 | N    | GLY | B | 25 | 9.235  | -6.883  | 2.372 | 1.00 | 0.00 | N   |
| ATOM | 313 | CA   | GLY | B | 25 | 10.396 | -6.050  | 2.010 | 1.00 | 0.00 | C   |
| ATOM | 314 | C    | GLY | B | 25 | 11.677 | -6.723  | 2.488 | 1.00 | 0.00 | C   |
| ATOM | 315 | O    | GLY | B | 25 | 11.903 | -6.952  | 3.680 | 1.00 | 0.00 | O   |
| ATOM | 316 | H    | GLY | B | 25 | 9.036  | -7.100  | 3.319 | 1.00 | 0.00 | H   |
| ATOM | 317 | N    | SER | B | 26 | 12.589 | -7.006  | 1.558 | 1.00 | 0.00 | N   |
| ATOM | 318 | CA   | SER | B | 26 | 13.952 | -7.456  | 1.863 | 1.00 | 0.00 | C   |
| ATOM | 319 | C    | SER | B | 26 | 14.989 | -6.327  | 1.859 | 1.00 | 0.00 | C   |
| ATOM | 320 | O    | SER | B | 26 | 15.459 | -5.965  | 0.787 | 1.00 | 0.00 | O   |
| ATOM | 321 | CB   | SER | B | 26 | 14.295 | -8.747  | 1.105 | 1.00 | 0.00 | C   |
| ATOM | 322 | OG   | SER | B | 26 | 15.379 | -9.487  | 1.662 | 1.00 | 0.00 | O   |
| ATOM | 323 | H    | SER | B | 26 | 12.608 | -6.430  | 0.735 | 1.00 | 0.00 | H   |
| ATOM | 324 | HG   | SER | B | 26 | 15.365 | -10.389 | 1.232 | 1.00 | 0.00 | H   |
| ATOM | 325 | N    | ASN | B | 27 | 15.444 | -6.023  | 3.072 | 1.00 | 0.00 | N   |
| ATOM | 326 | CA   | ASN | B | 27 | 16.265 | -4.893  | 3.562 | 1.00 | 0.00 | C   |
| ATOM | 327 | C    | ASN | B | 27 | 15.692 | -3.513  | 3.285 | 1.00 | 0.00 | C   |
| ATOM | 328 | O    | ASN | B | 27 | 15.824 | -2.915  | 2.221 | 1.00 | 0.00 | O   |
| ATOM | 329 | CB   | ASN | B | 27 | 17.710 | -5.052  | 3.062 | 1.00 | 0.00 | C   |
| ATOM | 330 | CG   | ASN | B | 27 | 18.537 | -6.264  | 3.495 | 1.00 | 0.00 | C   |
| ATOM | 331 | ND2  | ASN | B | 27 | 19.298 | -6.740  | 2.512 | 1.00 | 0.00 | N   |
| ATOM | 332 | OD1  | ASN | B | 27 | 18.284 | -6.949  | 4.486 | 1.00 | 0.00 | O   |
| ATOM | 333 | H    | ASN | B | 27 | 15.234 | -6.637  | 3.826 | 1.00 | 0.00 | H   |
| ATOM | 334 | 1HD2 | ASN | B | 27 | 19.347 | -6.292  | 1.629 | 1.00 | 0.00 | H   |
| ATOM | 335 | 2HD2 | ASN | B | 27 | 20.137 | -7.258  | 2.701 | 1.00 | 0.00 | H   |
| ATOM | 336 | N    | LYS | B | 28 | 15.206 | -2.943  | 4.386 | 1.00 | 0.00 | N   |

|      |     |     |     |   |    |        |        |        |      |      |     |
|------|-----|-----|-----|---|----|--------|--------|--------|------|------|-----|
| ATOM | 337 | CA  | LYS | B | 28 | 14.637 | -1.585 | 4.458  | 1.00 | 0.00 | C   |
| ATOM | 338 | C   | LYS | B | 28 | 15.725 | -0.631 | 4.951  | 1.00 | 0.00 | C   |
| ATOM | 339 | O   | LYS | B | 28 | 16.318 | -0.799 | 6.020  | 1.00 | 0.00 | O   |
| ATOM | 340 | CB  | LYS | B | 28 | 13.478 | -1.660 | 5.448  | 1.00 | 0.00 | C   |
| ATOM | 341 | CG  | LYS | B | 28 | 12.387 | -2.568 | 4.867  | 1.00 | 0.00 | C   |
| ATOM | 342 | CD  | LYS | B | 28 | 11.042 | -2.384 | 5.583  | 1.00 | 0.00 | C   |
| ATOM | 343 | CE  | LYS | B | 28 | 10.006 | -3.209 | 4.823  | 1.00 | 0.00 | C   |
| ATOM | 344 | NZ  | LYS | B | 28 | 8.671  | -3.163 | 5.451  | 1.00 | 0.00 | N1+ |
| ATOM | 345 | H   | LYS | B | 28 | 15.131 | -3.419 | 5.254  | 1.00 | 0.00 | H   |
| ATOM | 346 | HZ1 | LYS | B | 28 | 8.472  | -3.566 | 6.340  | 1.00 | 0.00 | H   |
| ATOM | 347 | HZ2 | LYS | B | 28 | 8.262  | -2.261 | 5.446  | 1.00 | 0.00 | H   |
| ATOM | 348 | HZ3 | LYS | B | 28 | 8.052  | -3.654 | 4.844  | 1.00 | 0.00 | H   |
| ATOM | 349 | N   | GLY | B | 29 | 15.884 | 0.521  | 4.317  | 1.00 | 0.00 | N   |
| ATOM | 350 | CA  | GLY | B | 29 | 16.954 | 1.466  | 4.659  | 1.00 | 0.00 | C   |
| ATOM | 351 | C   | GLY | B | 29 | 16.456 | 2.433  | 5.743  | 1.00 | 0.00 | C   |
| ATOM | 352 | O   | GLY | B | 29 | 16.590 | 2.025  | 6.897  | 1.00 | 0.00 | O   |
| ATOM | 353 | H   | GLY | B | 29 | 15.267 | 0.880  | 3.611  | 1.00 | 0.00 | H   |
| ATOM | 354 | N   | ALA | B | 30 | 15.743 | 3.519  | 5.470  | 1.00 | 0.00 | N   |
| ATOM | 355 | CA  | ALA | B | 30 | 15.545 | 4.553  | 6.492  | 1.00 | 0.00 | C   |
| ATOM | 356 | C   | ALA | B | 30 | 14.219 | 4.645  | 7.255  | 1.00 | 0.00 | C   |
| ATOM | 357 | O   | ALA | B | 30 | 14.194 | 3.944  | 8.262  | 1.00 | 0.00 | O   |
| ATOM | 358 | CB  | ALA | B | 30 | 15.881 | 5.902  | 5.850  | 1.00 | 0.00 | C   |
| ATOM | 359 | H   | ALA | B | 30 | 15.335 | 3.733  | 4.581  | 1.00 | 0.00 | H   |
| ATOM | 360 | N   | ILE | B | 31 | 13.208 | 5.316  | 6.698  | 1.00 | 0.00 | N   |
| ATOM | 361 | CA  | ILE | B | 31 | 11.965 | 5.565  | 7.441  | 1.00 | 0.00 | C   |
| ATOM | 362 | C   | ILE | B | 31 | 10.615 | 5.042  | 6.930  | 1.00 | 0.00 | C   |
| ATOM | 363 | O   | ILE | B | 31 | 10.386 | 5.175  | 5.725  | 1.00 | 0.00 | O   |
| ATOM | 364 | CB  | ILE | B | 31 | 11.812 | 7.059  | 7.721  | 1.00 | 0.00 | C   |
| ATOM | 365 | CG1 | ILE | B | 31 | 12.048 | 7.925  | 6.475  | 1.00 | 0.00 | C   |
| ATOM | 366 | CG2 | ILE | B | 31 | 12.775 | 7.553  | 8.805  | 1.00 | 0.00 | C   |
| ATOM | 367 | CD  | ILE | B | 31 | 12.046 | 9.437  | 6.626  | 1.00 | 0.00 | C   |
| ATOM | 368 | H   | ILE | B | 31 | 13.316 | 5.774  | 5.812  | 1.00 | 0.00 | H   |
| ATOM | 369 | N   | ILE | B | 32 | 9.906  | 4.438  | 7.879  | 1.00 | 0.00 | N   |
| ATOM | 370 | CA  | ILE | B | 32 | 8.621  | 3.829  | 7.514  | 1.00 | 0.00 | C   |
| ATOM | 371 | C   | ILE | B | 32 | 7.477  | 4.692  | 8.055  | 1.00 | 0.00 | C   |
| ATOM | 372 | O   | ILE | B | 32 | 7.084  | 4.723  | 9.229  | 1.00 | 0.00 | O   |
| ATOM | 373 | CB  | ILE | B | 32 | 8.349  | 2.377  | 7.909  | 1.00 | 0.00 | C   |
| ATOM | 374 | CG1 | ILE | B | 32 | 9.555  | 1.576  | 7.417  | 1.00 | 0.00 | C   |
| ATOM | 375 | CG2 | ILE | B | 32 | 7.088  | 1.863  | 7.222  | 1.00 | 0.00 | C   |
| ATOM | 376 | CD  | ILE | B | 32 | 9.387  | 0.070  | 7.676  | 1.00 | 0.00 | C   |
| ATOM | 377 | H   | ILE | B | 32 | 10.120 | 4.366  | 8.851  | 1.00 | 0.00 | H   |
| ATOM | 378 | N   | GLY | B | 33 | 6.729  | 5.243  | 7.105  | 1.00 | 0.00 | N   |
| ATOM | 379 | CA  | GLY | B | 33 | 5.487  | 6.021  | 7.257  | 1.00 | 0.00 | C   |
| ATOM | 380 | C   | GLY | B | 33 | 4.275  | 5.135  | 6.939  | 1.00 | 0.00 | C   |
| ATOM | 381 | O   | GLY | B | 33 | 3.955  | 4.997  | 5.764  | 1.00 | 0.00 | O   |
| ATOM | 382 | H   | GLY | B | 33 | 7.032  | 5.170  | 6.155  | 1.00 | 0.00 | H   |
| ATOM | 383 | N   | LEU | B | 34 | 3.767  | 4.525  | 7.995  | 1.00 | 0.00 | N   |
| ATOM | 384 | CA  | LEU | B | 34 | 2.544  | 3.707  | 8.031  | 1.00 | 0.00 | C   |
| ATOM | 385 | C   | LEU | B | 34 | 1.321  | 4.606  | 8.202  | 1.00 | 0.00 | C   |
| ATOM | 386 | O   | LEU | B | 34 | 0.925  | 5.014  | 9.289  | 1.00 | 0.00 | O   |
| ATOM | 387 | CB  | LEU | B | 34 | 2.659  | 2.815  | 9.271  | 1.00 | 0.00 | C   |
| ATOM | 388 | CG  | LEU | B | 34 | 3.803  | 1.806  | 9.325  | 1.00 | 0.00 | C   |
| ATOM | 389 | CD1 | LEU | B | 34 | 3.990  | 1.245  | 10.729 | 1.00 | 0.00 | C   |
| ATOM | 390 | CD2 | LEU | B | 34 | 3.664  | 0.710  | 8.262  | 1.00 | 0.00 | C   |
| ATOM | 391 | H   | LEU | B | 34 | 3.999  | 4.792  | 8.937  | 1.00 | 0.00 | H   |
| ATOM | 392 | N   | MET | B | 35 | 0.740  | 5.025  | 7.078  | 1.00 | 0.00 | N   |
| ATOM | 393 | CA  | MET | B | 35 | -0.464 | 5.880  | 7.093  | 1.00 | 0.00 | C   |
| ATOM | 394 | C   | MET | B | 35 | -1.716 | 5.025  | 6.883  | 1.00 | 0.00 | C   |
| ATOM | 395 | O   | MET | B | 35 | -2.249 | 4.850  | 5.791  | 1.00 | 0.00 | O   |
| ATOM | 396 | CB  | MET | B | 35 | -0.513 | 6.968  | 6.020  | 1.00 | 0.00 | C   |
| ATOM | 397 | CG  | MET | B | 35 | -1.277 | 8.195  | 6.506  | 1.00 | 0.00 | C   |
| ATOM | 398 | SD  | MET | B | 35 | -3.040 | 8.018  | 6.973  | 1.00 | 0.00 | S   |
| ATOM | 399 | CE  | MET | B | 35 | -3.262 | 9.384  | 8.090  | 1.00 | 0.00 | C   |
| ATOM | 400 | H   | MET | B | 35 | 1.163  | 4.764  | 6.218  | 1.00 | 0.00 | H   |
| ATOM | 401 | N   | VAL | B | 36 | -2.142 | 4.431  | 7.994  | 1.00 | 0.00 | N   |
| ATOM | 402 | CA  | VAL | B | 36 | -3.175 | 3.393  | 7.982  | 1.00 | 0.00 | C   |
| ATOM | 403 | C   | VAL | B | 36 | -4.541 | 3.940  | 8.432  | 1.00 | 0.00 | C   |
| ATOM | 404 | O   | VAL | B | 36 | -4.846 | 4.456  | 9.498  | 1.00 | 0.00 | O   |

|      |     |     |     |   |    |         |        |        |      |      |   |
|------|-----|-----|-----|---|----|---------|--------|--------|------|------|---|
| ATOM | 405 | CB  | VAL | B | 36 | -2.633  | 2.275  | 8.864  | 1.00 | 0.00 | C |
| ATOM | 406 | CG1 | VAL | B | 36 | -2.460  | 2.702  | 10.328 | 1.00 | 0.00 | C |
| ATOM | 407 | CG2 | VAL | B | 36 | -3.520  | 1.029  | 8.976  | 1.00 | 0.00 | C |
| ATOM | 408 | H   | VAL | B | 36 | -1.733  | 4.710  | 8.868  | 1.00 | 0.00 | H |
| ATOM | 409 | N   | GLY | B | 37 | -5.320  | 4.061  | 7.356  | 1.00 | 0.00 | N |
| ATOM | 410 | CA  | GLY | B | 37 | -6.757  | 4.308  | 7.576  | 1.00 | 0.00 | C |
| ATOM | 411 | C   | GLY | B | 37 | -7.423  | 5.402  | 6.753  | 1.00 | 0.00 | C |
| ATOM | 412 | O   | GLY | B | 37 | -6.863  | 6.063  | 5.879  | 1.00 | 0.00 | O |
| ATOM | 413 | H   | GLY | B | 37 | -5.104  | 3.898  | 6.393  | 1.00 | 0.00 | H |
| ATOM | 414 | N   | GLY | B | 38 | -8.725  | 5.374  | 7.028  | 1.00 | 0.00 | N |
| ATOM | 415 | CA  | GLY | B | 38 | -9.819  | 6.055  | 6.319  | 1.00 | 0.00 | C |
| ATOM | 416 | C   | GLY | B | 38 | -10.603 | 7.102  | 7.112  | 1.00 | 0.00 | C |
| ATOM | 417 | O   | GLY | B | 38 | -11.089 | 6.953  | 8.238  | 1.00 | 0.00 | O |
| ATOM | 418 | H   | GLY | B | 38 | -9.139  | 4.876  | 7.787  | 1.00 | 0.00 | H |
| ATOM | 419 | N   | VAL | B | 39 | -10.870 | 8.132  | 6.308  | 1.00 | 0.00 | N |
| ATOM | 420 | CA  | VAL | B | 39 | -11.390 | 9.417  | 6.798  | 1.00 | 0.00 | C |
| ATOM | 421 | C   | VAL | B | 39 | -12.877 | 9.476  | 6.464  | 1.00 | 0.00 | C |
| ATOM | 422 | O   | VAL | B | 39 | -13.157 | 9.559  | 5.268  | 1.00 | 0.00 | O |
| ATOM | 423 | CB  | VAL | B | 39 | -10.626 | 10.641 | 6.277  | 1.00 | 0.00 | C |
| ATOM | 424 | CG1 | VAL | B | 39 | -11.293 | 11.906 | 6.815  | 1.00 | 0.00 | C |
| ATOM | 425 | CG2 | VAL | B | 39 | -9.169  | 10.552 | 6.709  | 1.00 | 0.00 | C |
| ATOM | 426 | H   | VAL | B | 39 | -10.739 | 8.042  | 5.325  | 1.00 | 0.00 | H |
| ATOM | 427 | N   | VAL | B | 40 | -13.753 | 9.529  | 7.464  | 1.00 | 0.00 | N |
| ATOM | 428 | CA  | VAL | B | 40 | -15.217 | 9.610  | 7.409  | 1.00 | 0.00 | C |
| ATOM | 429 | C   | VAL | B | 40 | -15.795 | 10.945 | 6.927  | 1.00 | 0.00 | C |
| ATOM | 430 | O   | VAL | B | 40 | -15.640 | 11.908 | 7.678  | 1.00 | 0.00 | O |
| ATOM | 431 | CB  | VAL | B | 40 | -15.816 | 9.009  | 8.680  | 1.00 | 0.00 | C |
| ATOM | 432 | CG1 | VAL | B | 40 | -17.322 | 9.096  | 8.950  | 1.00 | 0.00 | C |
| ATOM | 433 | CG2 | VAL | B | 40 | -15.561 | 7.498  | 8.674  | 1.00 | 0.00 | C |
| ATOM | 434 | H   | VAL | B | 40 | -13.464 | 9.705  | 8.410  | 1.00 | 0.00 | H |
| ATOM | 435 | N   | ILE | B | 41 | -16.436 | 10.954 | 5.765  | 1.00 | 0.00 | N |
| ATOM | 436 | CA  | ILE | B | 41 | -17.234 | 12.086 | 5.253  | 1.00 | 0.00 | C |
| ATOM | 437 | C   | ILE | B | 41 | -18.660 | 11.541 | 5.115  | 1.00 | 0.00 | C |
| ATOM | 438 | O   | ILE | B | 41 | -18.950 | 10.899 | 4.098  | 1.00 | 0.00 | O |
| ATOM | 439 | CB  | ILE | B | 41 | -16.578 | 12.592 | 3.968  | 1.00 | 0.00 | C |
| ATOM | 440 | CG1 | ILE | B | 41 | -15.143 | 12.988 | 4.305  | 1.00 | 0.00 | C |
| ATOM | 441 | CG2 | ILE | B | 41 | -17.504 | 13.583 | 3.251  | 1.00 | 0.00 | C |
| ATOM | 442 | CD  | ILE | B | 41 | -14.820 | 14.421 | 4.714  | 1.00 | 0.00 | C |
| ATOM | 443 | H   | ILE | B | 41 | -16.410 | 10.241 | 5.067  | 1.00 | 0.00 | H |
| ATOM | 444 | N   | ALA | B | 42 | -19.443 | 11.969 | 6.087  | 1.00 | 0.00 | N |
| ATOM | 445 | CA  | ALA | B | 42 | -20.823 | 11.513 | 6.308  | 1.00 | 0.00 | C |
| ATOM | 446 | C   | ALA | B | 42 | -21.958 | 12.506 | 6.023  | 1.00 | 0.00 | C |
| ATOM | 447 | CB  | ALA | B | 42 | -20.994 | 11.089 | 7.768  | 1.00 | 0.00 | C |
| ATOM | 448 | O1  | ALA | B | 42 | -21.715 | 13.522 | 5.350  | 1.00 | 0.00 | O |
| ATOM | 449 | O2  | ALA | B | 42 | -23.120 | 12.082 | 6.241  | 1.00 | 0.00 | O |
| ATOM | 450 | H   | ALA | B | 42 | -19.202 | 12.777 | 6.619  | 1.00 | 0.00 | H |
| ATOM | 451 | N   | LEU | C | 17 | -14.882 | -8.766 | -0.045 | 1.00 | 0.00 | N |
| ATOM | 452 | CA  | LEU | C | 17 | -13.855 | -8.881 | -1.090 | 1.00 | 0.00 | C |
| ATOM | 453 | C   | LEU | C | 17 | -12.664 | -8.055 | -0.618 | 1.00 | 0.00 | C |
| ATOM | 454 | O   | LEU | C | 17 | -12.900 | -7.008 | -0.024 | 1.00 | 0.00 | O |
| ATOM | 455 | CB  | LEU | C | 17 | -14.420 | -8.335 | -2.399 | 1.00 | 0.00 | C |
| ATOM | 456 | CG  | LEU | C | 17 | -14.441 | -9.149 | -3.698 | 1.00 | 0.00 | C |
| ATOM | 457 | CD1 | LEU | C | 17 | -15.343 | -8.440 | -4.701 | 1.00 | 0.00 | C |
| ATOM | 458 | CD2 | LEU | C | 17 | -13.038 | -9.376 | -4.255 | 1.00 | 0.00 | C |
| ATOM | 459 | H1  | LEU | C | 17 | -14.603 | -8.385 | 0.845  | 1.00 | 0.00 | H |
| ATOM | 460 | H2  | LEU | C | 17 | -15.697 | -8.323 | -0.405 | 1.00 | 0.00 | H |
| ATOM | 461 | H3  | LEU | C | 17 | -15.201 | -9.695 | 0.137  | 1.00 | 0.00 | H |
| ATOM | 462 | N   | VAL | C | 18 | -11.419 | -8.521 | -0.642 | 1.00 | 0.00 | N |
| ATOM | 463 | CA  | VAL | C | 18 | -10.175 | -7.771 | -0.372 | 1.00 | 0.00 | C |
| ATOM | 464 | C   | VAL | C | 18 | -9.820  | -6.942 | -1.604 | 1.00 | 0.00 | C |
| ATOM | 465 | O   | VAL | C | 18 | -9.920  | -7.383 | -2.743 | 1.00 | 0.00 | O |
| ATOM | 466 | CB  | VAL | C | 18 | -9.088  | -8.702 | 0.147  | 1.00 | 0.00 | C |
| ATOM | 467 | CG1 | VAL | C | 18 | -8.875  | -9.861 | -0.833 | 1.00 | 0.00 | C |
| ATOM | 468 | CG2 | VAL | C | 18 | -7.809  | -7.979 | 0.584  | 1.00 | 0.00 | C |
| ATOM | 469 | H   | VAL | C | 18 | -11.187 | -9.472 | -0.847 | 1.00 | 0.00 | H |
| ATOM | 470 | N   | PHE | C | 19 | -9.337  | -5.743 | -1.290 | 1.00 | 0.00 | N |
| ATOM | 471 | CA  | PHE | C | 19 | -8.576  | -4.850 | -2.180 | 1.00 | 0.00 | C |
| ATOM | 472 | C   | PHE | C | 19 | -7.090  | -4.944 | -1.808 | 1.00 | 0.00 | C |

|      |     |     |     |   |    |         |         |        |      |      |     |
|------|-----|-----|-----|---|----|---------|---------|--------|------|------|-----|
| ATOM | 473 | O   | PHE | C | 19 | -6.728  | -4.455  | -0.737 | 1.00 | 0.00 | O   |
| ATOM | 474 | CB  | PHE | C | 19 | -9.230  | -3.488  | -1.994 | 1.00 | 0.00 | C   |
| ATOM | 475 | CG  | PHE | C | 19 | -8.602  | -2.516  | -2.995 | 1.00 | 0.00 | C   |
| ATOM | 476 | CD1 | PHE | C | 19 | -7.458  | -1.772  | -2.711 | 1.00 | 0.00 | C   |
| ATOM | 477 | CD2 | PHE | C | 19 | -9.542  | -2.148  | -3.958 | 1.00 | 0.00 | C   |
| ATOM | 478 | CE1 | PHE | C | 19 | -7.147  | -0.655  | -3.475 | 1.00 | 0.00 | C   |
| ATOM | 479 | CE2 | PHE | C | 19 | -9.201  | -1.022  | -4.704 | 1.00 | 0.00 | C   |
| ATOM | 480 | CZ  | PHE | C | 19 | -8.084  | -0.242  | -4.415 | 1.00 | 0.00 | C   |
| ATOM | 481 | H   | PHE | C | 19 | -9.410  | -5.371  | -0.358 | 1.00 | 0.00 | H   |
| ATOM | 482 | HD1 | PHE | C | 19 | -6.857  | -2.046  | -1.847 | 1.00 | 0.00 | H   |
| ATOM | 483 | HD2 | PHE | C | 19 | -10.255 | -2.913  | -4.251 | 1.00 | 0.00 | H   |
| ATOM | 484 | HE1 | PHE | C | 19 | -6.281  | -0.029  | -3.264 | 1.00 | 0.00 | H   |
| ATOM | 485 | HE2 | PHE | C | 19 | -9.881  | -0.676  | -5.477 | 1.00 | 0.00 | H   |
| ATOM | 486 | HZ  | PHE | C | 19 | -7.953  | 0.719   | -4.923 | 1.00 | 0.00 | H   |
| ATOM | 487 | N   | PHE | C | 20 | -6.361  | -5.816  | -2.478 | 1.00 | 0.00 | N   |
| ATOM | 488 | CA  | PHE | C | 20 | -5.001  | -6.220  | -2.080 | 1.00 | 0.00 | C   |
| ATOM | 489 | C   | PHE | C | 20 | -3.790  | -5.614  | -2.799 | 1.00 | 0.00 | C   |
| ATOM | 490 | O   | PHE | C | 20 | -3.823  | -5.382  | -4.007 | 1.00 | 0.00 | O   |
| ATOM | 491 | CB  | PHE | C | 20 | -4.978  | -7.748  | -2.106 | 1.00 | 0.00 | C   |
| ATOM | 492 | CG  | PHE | C | 20 | -3.735  | -8.308  | -1.403 | 1.00 | 0.00 | C   |
| ATOM | 493 | CD1 | PHE | C | 20 | -2.728  | -8.931  | -2.134 | 1.00 | 0.00 | C   |
| ATOM | 494 | CD2 | PHE | C | 20 | -3.632  | -8.249  | -0.024 | 1.00 | 0.00 | C   |
| ATOM | 495 | CE1 | PHE | C | 20 | -1.634  | -9.462  | -1.462 | 1.00 | 0.00 | C   |
| ATOM | 496 | CE2 | PHE | C | 20 | -2.490  | -8.714  | 0.625  | 1.00 | 0.00 | C   |
| ATOM | 497 | CZ  | PHE | C | 20 | -1.501  | -9.397  | -0.075 | 1.00 | 0.00 | C   |
| ATOM | 498 | H   | PHE | C | 20 | -6.751  | -6.284  | -3.269 | 1.00 | 0.00 | H   |
| ATOM | 499 | HD1 | PHE | C | 20 | -2.747  | -8.850  | -3.214 | 1.00 | 0.00 | H   |
| ATOM | 500 | HD2 | PHE | C | 20 | -4.516  | -8.009  | 0.568  | 1.00 | 0.00 | H   |
| ATOM | 501 | HE1 | PHE | C | 20 | -0.821  | -9.871  | -2.052 | 1.00 | 0.00 | H   |
| ATOM | 502 | HE2 | PHE | C | 20 | -2.291  | -8.458  | 1.661  | 1.00 | 0.00 | H   |
| ATOM | 503 | HZ  | PHE | C | 20 | -0.839  | -10.051 | 0.488  | 1.00 | 0.00 | H   |
| ATOM | 504 | N   | ALA | C | 21 | -2.744  | -5.198  | -2.089 | 1.00 | 0.00 | N   |
| ATOM | 505 | CA  | ALA | C | 21 | -1.427  | -4.964  | -2.685 | 1.00 | 0.00 | C   |
| ATOM | 506 | C   | ALA | C | 21 | -0.341  | -5.859  | -2.070 | 1.00 | 0.00 | C   |
| ATOM | 507 | O   | ALA | C | 21 | -0.350  | -6.141  | -0.873 | 1.00 | 0.00 | O   |
| ATOM | 508 | CB  | ALA | C | 21 | -1.082  | -3.482  | -2.620 | 1.00 | 0.00 | C   |
| ATOM | 509 | H   | ALA | C | 21 | -2.874  | -4.897  | -1.143 | 1.00 | 0.00 | H   |
| ATOM | 510 | N   | GLU | C | 22 | 0.540   | -6.344  | -2.944 | 1.00 | 0.00 | N   |
| ATOM | 511 | CA  | GLU | C | 22 | 1.853   | -6.878  | -2.532 | 1.00 | 0.00 | C   |
| ATOM | 512 | C   | GLU | C | 22 | 2.996   | -6.184  | -3.265 | 1.00 | 0.00 | C   |
| ATOM | 513 | O   | GLU | C | 22 | 3.146   | -6.340  | -4.470 | 1.00 | 0.00 | O   |
| ATOM | 514 | CB  | GLU | C | 22 | 1.811   | -8.351  | -2.952 | 1.00 | 0.00 | C   |
| ATOM | 515 | CG  | GLU | C | 22 | 2.161   | -9.274  | -1.794 | 1.00 | 0.00 | C   |
| ATOM | 516 | CD  | GLU | C | 22 | 1.926   | -10.759 | -2.065 | 1.00 | 0.00 | C   |
| ATOM | 517 | OE1 | GLU | C | 22 | 0.960   | -11.060 | -2.797 | 1.00 | 0.00 | O   |
| ATOM | 518 | OE2 | GLU | C | 22 | 2.626   | -11.607 | -1.468 | 1.00 | 0.00 | O1- |
| ATOM | 519 | H   | GLU | C | 22 | 0.335   | -6.486  | -3.909 | 1.00 | 0.00 | H   |
| ATOM | 520 | N   | ASP | C | 23 | 3.664   | -5.298  | -2.515 | 1.00 | 0.00 | N   |
| ATOM | 521 | CA  | ASP | C | 23 | 4.923   | -4.582  | -2.767 | 1.00 | 0.00 | C   |
| ATOM | 522 | C   | ASP | C | 23 | 6.058   | -5.555  | -2.425 | 1.00 | 0.00 | C   |
| ATOM | 523 | O   | ASP | C | 23 | 6.414   | -5.785  | -1.267 | 1.00 | 0.00 | O   |
| ATOM | 524 | CB  | ASP | C | 23 | 4.923   | -3.263  | -1.994 | 1.00 | 0.00 | C   |
| ATOM | 525 | CG  | ASP | C | 23 | 6.167   | -2.406  | -2.250 | 1.00 | 0.00 | C   |
| ATOM | 526 | OD1 | ASP | C | 23 | 7.247   | -3.025  | -2.253 | 1.00 | 0.00 | O   |
| ATOM | 527 | OD2 | ASP | C | 23 | 6.061   | -1.218  | -2.608 | 1.00 | 0.00 | O1- |
| ATOM | 528 | H   | ASP | C | 23 | 3.220   | -5.090  | -1.645 | 1.00 | 0.00 | H   |
| ATOM | 529 | N   | VAL | C | 24 | 6.439   | -6.397  | -3.374 | 1.00 | 0.00 | N   |
| ATOM | 530 | CA  | VAL | C | 24 | 7.641   | -7.205  | -3.114 | 1.00 | 0.00 | C   |
| ATOM | 531 | C   | VAL | C | 24 | 8.955   | -6.595  | -3.623 | 1.00 | 0.00 | C   |
| ATOM | 532 | O   | VAL | C | 24 | 9.246   | -6.628  | -4.814 | 1.00 | 0.00 | O   |
| ATOM | 533 | CB  | VAL | C | 24 | 7.579   | -8.586  | -3.753 | 1.00 | 0.00 | C   |
| ATOM | 534 | CG1 | VAL | C | 24 | 8.729   | -9.499  | -3.320 | 1.00 | 0.00 | C   |
| ATOM | 535 | CG2 | VAL | C | 24 | 6.220   | -9.298  | -3.793 | 1.00 | 0.00 | C   |
| ATOM | 536 | H   | VAL | C | 24 | 6.230   | -6.177  | -4.331 | 1.00 | 0.00 | H   |
| ATOM | 537 | N   | GLY | C | 25 | 9.644   | -6.121  | -2.588 | 1.00 | 0.00 | N   |
| ATOM | 538 | CA  | GLY | C | 25 | 10.821  | -5.262  | -2.752 | 1.00 | 0.00 | C   |
| ATOM | 539 | C   | GLY | C | 25 | 12.155  | -5.815  | -2.235 | 1.00 | 0.00 | C   |
| ATOM | 540 | O   | GLY | C | 25 | 12.312  | -6.120  | -1.048 | 1.00 | 0.00 | O   |

|      |     |      |     |   |    |        |        |        |      |      |     |
|------|-----|------|-----|---|----|--------|--------|--------|------|------|-----|
| ATOM | 541 | H    | GLY | C | 25 | 9.382  | -6.099 | -1.620 | 1.00 | 0.00 | H   |
| ATOM | 542 | N    | SER | C | 26 | 13.134 | -5.728 | -3.131 | 1.00 | 0.00 | N   |
| ATOM | 543 | CA   | SER | C | 26 | 14.525 | -6.044 | -2.799 | 1.00 | 0.00 | C   |
| ATOM | 544 | C    | SER | C | 26 | 15.357 | -4.759 | -2.683 | 1.00 | 0.00 | C   |
| ATOM | 545 | O    | SER | C | 26 | 15.597 | -4.123 | -3.705 | 1.00 | 0.00 | O   |
| ATOM | 546 | CB   | SER | C | 26 | 15.222 | -7.004 | -3.767 | 1.00 | 0.00 | C   |
| ATOM | 547 | OG   | SER | C | 26 | 16.536 | -7.442 | -3.402 | 1.00 | 0.00 | O   |
| ATOM | 548 | H    | SER | C | 26 | 12.876 | -5.515 | -4.075 | 1.00 | 0.00 | H   |
| ATOM | 549 | HG   | SER | C | 26 | 17.017 | -7.356 | -4.284 | 1.00 | 0.00 | H   |
| ATOM | 550 | N    | ASN | C | 27 | 15.774 | -4.361 | -1.485 | 1.00 | 0.00 | N   |
| ATOM | 551 | CA   | ASN | C | 27 | 16.431 | -3.098 | -1.116 | 1.00 | 0.00 | C   |
| ATOM | 552 | C    | ASN | C | 27 | 15.684 | -1.777 | -1.246 | 1.00 | 0.00 | C   |
| ATOM | 553 | O    | ASN | C | 27 | 15.377 | -1.152 | -2.261 | 1.00 | 0.00 | O   |
| ATOM | 554 | CB   | ASN | C | 27 | 17.756 | -2.961 | -1.868 | 1.00 | 0.00 | C   |
| ATOM | 555 | CG   | ASN | C | 27 | 18.708 | -2.053 | -1.069 | 1.00 | 0.00 | C   |
| ATOM | 556 | ND2  | ASN | C | 27 | 18.863 | -0.797 | -1.446 | 1.00 | 0.00 | N   |
| ATOM | 557 | OD1  | ASN | C | 27 | 19.435 | -2.518 | -0.195 | 1.00 | 0.00 | O   |
| ATOM | 558 | H    | ASN | C | 27 | 15.693 | -5.012 | -0.728 | 1.00 | 0.00 | H   |
| ATOM | 559 | 1HD2 | ASN | C | 27 | 18.437 | -0.466 | -2.295 | 1.00 | 0.00 | H   |
| ATOM | 560 | 2HD2 | ASN | C | 27 | 19.480 | -0.251 | -0.879 | 1.00 | 0.00 | H   |
| ATOM | 561 | N    | LYS | C | 28 | 15.033 | -1.318 | -0.181 | 1.00 | 0.00 | N   |
| ATOM | 562 | CA   | LYS | C | 28 | 14.136 | -0.163 | -0.084 | 1.00 | 0.00 | C   |
| ATOM | 563 | C    | LYS | C | 28 | 14.793 | 0.925  | 0.772  | 1.00 | 0.00 | C   |
| ATOM | 564 | O    | LYS | C | 28 | 14.837 | 0.864  | 2.001  | 1.00 | 0.00 | O   |
| ATOM | 565 | CB   | LYS | C | 28 | 12.852 | -0.671 | 0.569  | 1.00 | 0.00 | C   |
| ATOM | 566 | CG   | LYS | C | 28 | 12.146 | -1.761 | -0.246 | 1.00 | 0.00 | C   |
| ATOM | 567 | CD   | LYS | C | 28 | 10.758 | -2.055 | 0.322  | 1.00 | 0.00 | C   |
| ATOM | 568 | CE   | LYS | C | 28 | 9.826  | -0.867 | 0.109  | 1.00 | 0.00 | C   |
| ATOM | 569 | NZ   | LYS | C | 28 | 8.442  | -1.344 | 0.201  | 1.00 | 0.00 | N1+ |
| ATOM | 570 | H    | LYS | C | 28 | 15.159 | -1.772 | 0.708  | 1.00 | 0.00 | H   |
| ATOM | 571 | HZ1  | LYS | C | 28 | 8.226  | -1.911 | 0.998  | 1.00 | 0.00 | H   |
| ATOM | 572 | HZ2  | LYS | C | 28 | 7.803  | -0.580 | 0.197  | 1.00 | 0.00 | H   |
| ATOM | 573 | HZ3  | LYS | C | 28 | 8.200  | -1.899 | -0.598 | 1.00 | 0.00 | H   |
| ATOM | 574 | N    | GLY | C | 29 | 15.133 | 2.017  | 0.073  | 1.00 | 0.00 | N   |
| ATOM | 575 | CA   | GLY | C | 29 | 15.914 | 3.111  | 0.641  | 1.00 | 0.00 | C   |
| ATOM | 576 | C    | GLY | C | 29 | 15.168 | 3.924  | 1.708  | 1.00 | 0.00 | C   |
| ATOM | 577 | O    | GLY | C | 29 | 14.943 | 3.461  | 2.821  | 1.00 | 0.00 | O   |
| ATOM | 578 | H    | GLY | C | 29 | 15.049 | 1.924  | -0.924 | 1.00 | 0.00 | H   |
| ATOM | 579 | N    | ALA | C | 30 | 15.355 | 5.216  | 1.445  | 1.00 | 0.00 | N   |
| ATOM | 580 | CA   | ALA | C | 30 | 15.046 | 6.400  | 2.261  | 1.00 | 0.00 | C   |
| ATOM | 581 | C    | ALA | C | 30 | 13.659 | 6.511  | 2.900  | 1.00 | 0.00 | C   |
| ATOM | 582 | O    | ALA | C | 30 | 13.412 | 5.987  | 3.984  | 1.00 | 0.00 | O   |
| ATOM | 583 | CB   | ALA | C | 30 | 15.534 | 7.581  | 1.430  | 1.00 | 0.00 | C   |
| ATOM | 584 | H    | ALA | C | 30 | 15.991 | 5.333  | 0.685  | 1.00 | 0.00 | H   |
| ATOM | 585 | N    | ILE | C | 31 | 12.664 | 6.840  | 2.078  | 1.00 | 0.00 | N   |
| ATOM | 586 | CA   | ILE | C | 31 | 11.289 | 7.046  | 2.537  | 1.00 | 0.00 | C   |
| ATOM | 587 | C    | ILE | C | 31 | 10.341 | 5.943  | 2.046  | 1.00 | 0.00 | C   |
| ATOM | 588 | O    | ILE | C | 31 | 10.123 | 5.791  | 0.850  | 1.00 | 0.00 | O   |
| ATOM | 589 | CB   | ILE | C | 31 | 10.712 | 8.382  | 2.064  | 1.00 | 0.00 | C   |
| ATOM | 590 | CG1  | ILE | C | 31 | 11.688 | 9.505  | 2.398  | 1.00 | 0.00 | C   |
| ATOM | 591 | CG2  | ILE | C | 31 | 9.409  | 8.682  | 2.810  | 1.00 | 0.00 | C   |
| ATOM | 592 | CD   | ILE | C | 31 | 11.138 | 10.856 | 1.922  | 1.00 | 0.00 | C   |
| ATOM | 593 | H    | ILE | C | 31 | 12.770 | 7.057  | 1.112  | 1.00 | 0.00 | H   |
| ATOM | 594 | N    | ILE | C | 32 | 9.767  | 5.138  | 2.935  | 1.00 | 0.00 | N   |
| ATOM | 595 | CA   | ILE | C | 32 | 8.962  | 3.938  | 2.681  | 1.00 | 0.00 | C   |
| ATOM | 596 | C    | ILE | C | 32 | 7.538  | 4.245  | 3.124  | 1.00 | 0.00 | C   |
| ATOM | 597 | O    | ILE | C | 32 | 7.264  | 4.566  | 4.284  | 1.00 | 0.00 | O   |
| ATOM | 598 | CB   | ILE | C | 32 | 9.524  | 2.713  | 3.399  | 1.00 | 0.00 | C   |
| ATOM | 599 | CG1  | ILE | C | 32 | 11.019 | 2.520  | 3.127  | 1.00 | 0.00 | C   |
| ATOM | 600 | CG2  | ILE | C | 32 | 8.745  | 1.446  | 3.024  | 1.00 | 0.00 | C   |
| ATOM | 601 | CD   | ILE | C | 32 | 11.653 | 1.465  | 4.036  | 1.00 | 0.00 | C   |
| ATOM | 602 | H    | ILE | C | 32 | 9.999  | 5.245  | 3.906  | 1.00 | 0.00 | H   |
| ATOM | 603 | N    | GLY | C | 33 | 6.687  | 4.447  | 2.117  | 1.00 | 0.00 | N   |
| ATOM | 604 | CA   | GLY | C | 33 | 5.315  | 4.832  | 2.474  | 1.00 | 0.00 | C   |
| ATOM | 605 | C    | GLY | C | 33 | 4.303  | 3.733  | 2.137  | 1.00 | 0.00 | C   |
| ATOM | 606 | O    | GLY | C | 33 | 4.179  | 3.210  | 1.024  | 1.00 | 0.00 | O   |
| ATOM | 607 | H    | GLY | C | 33 | 6.920  | 4.522  | 1.143  | 1.00 | 0.00 | H   |
| ATOM | 608 | N    | LEU | C | 34 | 3.416  | 3.616  | 3.117  | 1.00 | 0.00 | N   |

|      |     |     |     |   |    |         |        |        |      |      |   |
|------|-----|-----|-----|---|----|---------|--------|--------|------|------|---|
| ATOM | 609 | CA  | LEU | C | 34 | 2.227   | 2.746  | 3.049  | 1.00 | 0.00 | C |
| ATOM | 610 | C   | LEU | C | 34 | 1.017   | 3.592  | 3.442  | 1.00 | 0.00 | C |
| ATOM | 611 | O   | LEU | C | 34 | 0.783   | 4.018  | 4.572  | 1.00 | 0.00 | O |
| ATOM | 612 | CB  | LEU | C | 34 | 2.297   | 1.453  | 3.863  | 1.00 | 0.00 | C |
| ATOM | 613 | CG  | LEU | C | 34 | 3.382   | 0.485  | 3.384  | 1.00 | 0.00 | C |
| ATOM | 614 | CD1 | LEU | C | 34 | 4.791   | 0.741  | 3.898  | 1.00 | 0.00 | C |
| ATOM | 615 | CD2 | LEU | C | 34 | 2.992   | -0.939 | 3.767  | 1.00 | 0.00 | C |
| ATOM | 616 | H   | LEU | C | 34 | 3.469   | 4.114  | 3.982  | 1.00 | 0.00 | H |
| ATOM | 617 | N   | MET | C | 35 | 0.483   | 4.221  | 2.402  | 1.00 | 0.00 | N |
| ATOM | 618 | CA  | MET | C | 35 | -0.719  | 5.063  | 2.399  | 1.00 | 0.00 | C |
| ATOM | 619 | C   | MET | C | 35 | -1.960  | 4.223  | 2.084  | 1.00 | 0.00 | C |
| ATOM | 620 | O   | MET | C | 35 | -2.360  | 4.033  | 0.940  | 1.00 | 0.00 | O |
| ATOM | 621 | CB  | MET | C | 35 | -0.605  | 6.242  | 1.437  | 1.00 | 0.00 | C |
| ATOM | 622 | CG  | MET | C | 35 | 0.414   | 7.252  | 1.972  | 1.00 | 0.00 | C |
| ATOM | 623 | SD  | MET | C | 35 | 2.130   | 6.884  | 1.451  | 1.00 | 0.00 | S |
| ATOM | 624 | CE  | MET | C | 35 | 3.008   | 8.305  | 2.070  | 1.00 | 0.00 | C |
| ATOM | 625 | H   | MET | C | 35 | 0.814   | 4.054  | 1.477  | 1.00 | 0.00 | H |
| ATOM | 626 | N   | VAL | C | 36 | -2.618  | 3.773  | 3.156  | 1.00 | 0.00 | N |
| ATOM | 627 | CA  | VAL | C | 36 | -3.672  | 2.754  | 3.030  | 1.00 | 0.00 | C |
| ATOM | 628 | C   | VAL | C | 36 | -4.973  | 3.469  | 3.367  | 1.00 | 0.00 | C |
| ATOM | 629 | O   | VAL | C | 36 | -5.004  | 4.098  | 4.426  | 1.00 | 0.00 | O |
| ATOM | 630 | CB  | VAL | C | 36 | -3.448  | 1.438  | 3.783  | 1.00 | 0.00 | C |
| ATOM | 631 | CG1 | VAL | C | 36 | -4.211  | 0.274  | 3.146  | 1.00 | 0.00 | C |
| ATOM | 632 | CG2 | VAL | C | 36 | -1.972  | 1.032  | 3.732  | 1.00 | 0.00 | C |
| ATOM | 633 | H   | VAL | C | 36 | -2.501  | 4.158  | 4.071  | 1.00 | 0.00 | H |
| ATOM | 634 | N   | GLY | C | 37 | -5.856  | 3.757  | 2.417  | 1.00 | 0.00 | N |
| ATOM | 635 | CA  | GLY | C | 37 | -7.153  | 4.441  | 2.567  | 1.00 | 0.00 | C |
| ATOM | 636 | C   | GLY | C | 37 | -7.399  | 5.781  | 1.861  | 1.00 | 0.00 | C |
| ATOM | 637 | O   | GLY | C | 37 | -7.653  | 5.664  | 0.670  | 1.00 | 0.00 | O |
| ATOM | 638 | H   | GLY | C | 37 | -5.574  | 3.421  | 1.524  | 1.00 | 0.00 | H |
| ATOM | 639 | N   | GLY | C | 38 | -7.677  | 6.797  | 2.685  | 1.00 | 0.00 | N |
| ATOM | 640 | CA  | GLY | C | 38 | -8.031  | 8.155  | 2.264  | 1.00 | 0.00 | C |
| ATOM | 641 | C   | GLY | C | 38 | -9.481  | 8.512  | 2.607  | 1.00 | 0.00 | C |
| ATOM | 642 | O   | GLY | C | 38 | -9.903  | 8.109  | 3.685  | 1.00 | 0.00 | O |
| ATOM | 643 | H   | GLY | C | 38 | -7.434  | 6.729  | 3.645  | 1.00 | 0.00 | H |
| ATOM | 644 | N   | VAL | C | 39 | -10.309 | 9.014  | 1.699  | 1.00 | 0.00 | N |
| ATOM | 645 | CA  | VAL | C | 39 | -11.692 | 9.392  | 2.027  | 1.00 | 0.00 | C |
| ATOM | 646 | C   | VAL | C | 39 | -12.849 | 8.439  | 1.739  | 1.00 | 0.00 | C |
| ATOM | 647 | O   | VAL | C | 39 | -13.041 | 8.050  | 0.584  | 1.00 | 0.00 | O |
| ATOM | 648 | CB  | VAL | C | 39 | -12.041 | 10.794 | 1.496  | 1.00 | 0.00 | C |
| ATOM | 649 | CG1 | VAL | C | 39 | -11.520 | 11.837 | 2.486  | 1.00 | 0.00 | C |
| ATOM | 650 | CG2 | VAL | C | 39 | -11.509 | 10.986 | 0.086  | 1.00 | 0.00 | C |
| ATOM | 651 | H   | VAL | C | 39 | -10.176 | 8.964  | 0.709  | 1.00 | 0.00 | H |
| ATOM | 652 | N   | VAL | C | 40 | -13.597 | 8.198  | 2.808  | 1.00 | 0.00 | N |
| ATOM | 653 | CA  | VAL | C | 40 | -14.753 | 7.291  | 2.847  | 1.00 | 0.00 | C |
| ATOM | 654 | C   | VAL | C | 40 | -16.007 | 8.152  | 2.711  | 1.00 | 0.00 | C |
| ATOM | 655 | O   | VAL | C | 40 | -16.500 | 8.765  | 3.653  | 1.00 | 0.00 | O |
| ATOM | 656 | CB  | VAL | C | 40 | -14.610 | 6.416  | 4.094  | 1.00 | 0.00 | C |
| ATOM | 657 | CG1 | VAL | C | 40 | -15.825 | 5.501  | 3.974  | 1.00 | 0.00 | C |
| ATOM | 658 | CG2 | VAL | C | 40 | -13.274 | 5.702  | 4.335  | 1.00 | 0.00 | C |
| ATOM | 659 | H   | VAL | C | 40 | -13.507 | 8.712  | 3.660  | 1.00 | 0.00 | H |
| ATOM | 660 | N   | ILE | C | 41 | -16.645 | 8.028  | 1.552  | 1.00 | 0.00 | N |
| ATOM | 661 | CA  | ILE | C | 41 | -17.857 | 8.717  | 1.089  | 1.00 | 0.00 | C |
| ATOM | 662 | C   | ILE | C | 41 | -18.924 | 7.618  | 1.180  | 1.00 | 0.00 | C |
| ATOM | 663 | O   | ILE | C | 41 | -18.802 | 6.606  | 0.491  | 1.00 | 0.00 | O |
| ATOM | 664 | CB  | ILE | C | 41 | -17.690 | 9.227  | -0.346 | 1.00 | 0.00 | C |
| ATOM | 665 | CG1 | ILE | C | 41 | -16.569 | 10.274 | -0.379 | 1.00 | 0.00 | C |
| ATOM | 666 | CG2 | ILE | C | 41 | -19.012 | 9.862  | -0.766 | 1.00 | 0.00 | C |
| ATOM | 667 | CD  | ILE | C | 41 | -16.269 | 10.986 | -1.690 | 1.00 | 0.00 | C |
| ATOM | 668 | H   | ILE | C | 41 | -16.288 | 7.444  | 0.812  | 1.00 | 0.00 | H |
| ATOM | 669 | N   | ALA | C | 42 | -19.903 | 7.907  | 2.040  | 1.00 | 0.00 | N |
| ATOM | 670 | CA  | ALA | C | 42 | -20.848 | 6.877  | 2.512  | 1.00 | 0.00 | C |
| ATOM | 671 | C   | ALA | C | 42 | -22.020 | 7.429  | 3.321  | 1.00 | 0.00 | C |
| ATOM | 672 | CB  | ALA | C | 42 | -20.068 | 5.816  | 3.286  | 1.00 | 0.00 | C |
| ATOM | 673 | O1  | ALA | C | 42 | -21.904 | 8.507  | 3.941  | 1.00 | 0.00 | O |
| ATOM | 674 | O2  | ALA | C | 42 | -23.122 | 6.870  | 3.105  | 1.00 | 0.00 | O |
| ATOM | 675 | H   | ALA | C | 42 | -19.956 | 8.760  | 2.562  | 1.00 | 0.00 | H |
| ATOM | 676 | N   | LEU | D | 17 | -14.317 | -0.840 | -8.645 | 1.00 | 0.00 | N |



|      |     |     |     |   |    |         |         |         |      |      |     |
|------|-----|-----|-----|---|----|---------|---------|---------|------|------|-----|
| ATOM | 677 | CA  | LEU | D | 17 | -13.156 | -1.573  | -9.169  | 1.00 | 0.00 | C   |
| ATOM | 678 | C   | LEU | D | 17 | -12.389 | -2.153  | -7.981  | 1.00 | 0.00 | C   |
| ATOM | 679 | O   | LEU | D | 17 | -12.326 | -1.537  | -6.923  | 1.00 | 0.00 | O   |
| ATOM | 680 | CB  | LEU | D | 17 | -12.367 | -0.525  | -9.964  | 1.00 | 0.00 | C   |
| ATOM | 681 | CG  | LEU | D | 17 | -11.024 | -1.072  | -10.454 | 1.00 | 0.00 | C   |
| ATOM | 682 | CD1 | LEU | D | 17 | -11.110 | -2.088  | -11.593 | 1.00 | 0.00 | C   |
| ATOM | 683 | CD2 | LEU | D | 17 | -9.945  | 0.013   | -10.573 | 1.00 | 0.00 | C   |
| ATOM | 684 | H1  | LEU | D | 17 | -14.404 | -0.710  | -7.660  | 1.00 | 0.00 | H   |
| ATOM | 685 | H2  | LEU | D | 17 | -14.353 | 0.047   | -9.095  | 1.00 | 0.00 | H   |
| ATOM | 686 | H3  | LEU | D | 17 | -15.146 | -1.311  | -8.956  | 1.00 | 0.00 | H   |
| ATOM | 687 | N   | VAL | D | 18 | -11.985 | -3.413  | -8.137  | 1.00 | 0.00 | N   |
| ATOM | 688 | CA  | VAL | D | 18 | -11.211 | -4.145  | -7.126  | 1.00 | 0.00 | C   |
| ATOM | 689 | C   | VAL | D | 18 | -9.776  | -4.303  | -7.615  | 1.00 | 0.00 | C   |
| ATOM | 690 | O   | VAL | D | 18 | -9.548  | -4.941  | -8.647  | 1.00 | 0.00 | O   |
| ATOM | 691 | CB  | VAL | D | 18 | -11.862 | -5.498  | -6.819  | 1.00 | 0.00 | C   |
| ATOM | 692 | CG1 | VAL | D | 18 | -11.130 | -6.309  | -5.742  | 1.00 | 0.00 | C   |
| ATOM | 693 | CG2 | VAL | D | 18 | -13.303 | -5.361  | -6.325  | 1.00 | 0.00 | C   |
| ATOM | 694 | H   | VAL | D | 18 | -12.344 | -3.980  | -8.880  | 1.00 | 0.00 | H   |
| ATOM | 695 | N   | PHE | D | 19 | -8.830  | -3.764  | -6.853  | 1.00 | 0.00 | N   |
| ATOM | 696 | CA  | PHE | D | 19 | -7.443  | -3.827  | -7.338  | 1.00 | 0.00 | C   |
| ATOM | 697 | C   | PHE | D | 19 | -6.653  | -4.886  | -6.564  | 1.00 | 0.00 | C   |
| ATOM | 698 | O   | PHE | D | 19 | -6.627  | -4.910  | -5.342  | 1.00 | 0.00 | O   |
| ATOM | 699 | CB  | PHE | D | 19 | -6.732  | -2.501  | -7.083  | 1.00 | 0.00 | C   |
| ATOM | 700 | CG  | PHE | D | 19 | -6.006  | -2.039  | -8.342  | 1.00 | 0.00 | C   |
| ATOM | 701 | CD1 | PHE | D | 19 | -4.690  | -2.416  | -8.587  | 1.00 | 0.00 | C   |
| ATOM | 702 | CD2 | PHE | D | 19 | -6.443  | -0.817  | -8.860  | 1.00 | 0.00 | C   |
| ATOM | 703 | CE1 | PHE | D | 19 | -3.883  | -1.635  | -9.397  | 1.00 | 0.00 | C   |
| ATOM | 704 | CE2 | PHE | D | 19 | -5.621  | 0.007   | -9.617  | 1.00 | 0.00 | C   |
| ATOM | 705 | CZ  | PHE | D | 19 | -4.346  | -0.443  | -9.939  | 1.00 | 0.00 | C   |
| ATOM | 706 | H   | PHE | D | 19 | -9.099  | -3.115  | -6.137  | 1.00 | 0.00 | H   |
| ATOM | 707 | HD1 | PHE | D | 19 | -4.226  | -3.305  | -8.149  | 1.00 | 0.00 | H   |
| ATOM | 708 | HD2 | PHE | D | 19 | -7.470  | -0.440  | -8.877  | 1.00 | 0.00 | H   |
| ATOM | 709 | HE1 | PHE | D | 19 | -2.826  | -1.529  | -9.120  | 1.00 | 0.00 | H   |
| ATOM | 710 | HE2 | PHE | D | 19 | -5.999  | 0.995   | -9.871  | 1.00 | 0.00 | H   |
| ATOM | 711 | HZ  | PHE | D | 19 | -3.662  | 0.117   | -10.575 | 1.00 | 0.00 | H   |
| ATOM | 712 | N   | PHE | D | 20 | -6.039  | -5.777  | -7.339  | 1.00 | 0.00 | N   |
| ATOM | 713 | CA  | PHE | D | 20 | -5.107  | -6.817  | -6.857  | 1.00 | 0.00 | C   |
| ATOM | 714 | C   | PHE | D | 20 | -3.761  | -6.550  | -7.541  | 1.00 | 0.00 | C   |
| ATOM | 715 | O   | PHE | D | 20 | -3.509  | -6.913  | -8.683  | 1.00 | 0.00 | O   |
| ATOM | 716 | CB  | PHE | D | 20 | -5.745  | -8.118  | -7.352  | 1.00 | 0.00 | C   |
| ATOM | 717 | CG  | PHE | D | 20 | -7.085  | -8.364  | -6.672  | 1.00 | 0.00 | C   |
| ATOM | 718 | CD1 | PHE | D | 20 | -8.264  | -8.606  | -7.369  | 1.00 | 0.00 | C   |
| ATOM | 719 | CD2 | PHE | D | 20 | -7.143  | -8.543  | -5.298  | 1.00 | 0.00 | C   |
| ATOM | 720 | CE1 | PHE | D | 20 | -9.400  | -9.087  | -6.724  | 1.00 | 0.00 | C   |
| ATOM | 721 | CE2 | PHE | D | 20 | -8.253  | -9.043  | -4.611  | 1.00 | 0.00 | C   |
| ATOM | 722 | CZ  | PHE | D | 20 | -9.390  | -9.304  | -5.345  | 1.00 | 0.00 | C   |
| ATOM | 723 | H   | PHE | D | 20 | -6.060  | -5.765  | -8.336  | 1.00 | 0.00 | H   |
| ATOM | 724 | HD1 | PHE | D | 20 | -8.291  | -8.358  | -8.427  | 1.00 | 0.00 | H   |
| ATOM | 725 | HD2 | PHE | D | 20 | -6.202  | -8.610  | -4.754  | 1.00 | 0.00 | H   |
| ATOM | 726 | HE1 | PHE | D | 20 | -10.322 | -9.295  | -7.271  | 1.00 | 0.00 | H   |
| ATOM | 727 | HE2 | PHE | D | 20 | -8.228  | -9.216  | -3.535  | 1.00 | 0.00 | H   |
| ATOM | 728 | HZ  | PHE | D | 20 | -10.350 | -9.522  | -4.874  | 1.00 | 0.00 | H   |
| ATOM | 729 | N   | ALA | D | 21 | -2.955  | -5.938  | -6.676  | 1.00 | 0.00 | N   |
| ATOM | 730 | CA  | ALA | D | 21 | -1.638  | -5.404  | -7.030  | 1.00 | 0.00 | C   |
| ATOM | 731 | C   | ALA | D | 21 | -0.565  | -6.472  | -6.811  | 1.00 | 0.00 | C   |
| ATOM | 732 | O   | ALA | D | 21 | -0.414  | -7.000  | -5.717  | 1.00 | 0.00 | O   |
| ATOM | 733 | CB  | ALA | D | 21 | -1.277  | -4.053  | -6.414  | 1.00 | 0.00 | C   |
| ATOM | 734 | H   | ALA | D | 21 | -3.283  | -5.790  | -5.738  | 1.00 | 0.00 | H   |
| ATOM | 735 | N   | GLU | D | 22 | 0.306   | -6.610  | -7.817  | 1.00 | 0.00 | N   |
| ATOM | 736 | CA  | GLU | D | 22 | 1.546   | -7.371  | -7.627  | 1.00 | 0.00 | C   |
| ATOM | 737 | C   | GLU | D | 22 | 2.672   | -6.547  | -8.240  | 1.00 | 0.00 | C   |
| ATOM | 738 | O   | GLU | D | 22 | 2.761   | -6.259  | -9.441  | 1.00 | 0.00 | O   |
| ATOM | 739 | CB  | GLU | D | 22 | 1.407   | -8.702  | -8.374  | 1.00 | 0.00 | C   |
| ATOM | 740 | CG  | GLU | D | 22 | 2.497   | -9.655  | -7.861  | 1.00 | 0.00 | C   |
| ATOM | 741 | CD  | GLU | D | 22 | 2.542   | -10.981 | -8.605  | 1.00 | 0.00 | C   |
| ATOM | 742 | OE1 | GLU | D | 22 | 3.677   | -11.496 | -8.729  | 1.00 | 0.00 | O   |
| ATOM | 743 | OE2 | GLU | D | 22 | 1.552   | -11.616 | -9.034  | 1.00 | 0.00 | O1- |
| ATOM | 744 | H   | GLU | D | 22 | 0.052   | -6.363  | -8.747  | 1.00 | 0.00 | H   |

|      |     |      |     |   |    |        |        |        |      |      |     |
|------|-----|------|-----|---|----|--------|--------|--------|------|------|-----|
| ATOM | 745 | N    | ASP | D | 23 | 3.411  | -5.983 | -7.283 | 1.00 | 0.00 | N   |
| ATOM | 746 | CA   | ASP | D | 23 | 4.614  | -5.209 | -7.615 | 1.00 | 0.00 | C   |
| ATOM | 747 | C    | ASP | D | 23 | 5.893  | -5.949 | -7.216 | 1.00 | 0.00 | C   |
| ATOM | 748 | O    | ASP | D | 23 | 6.442  | -5.652 | -6.156 | 1.00 | 0.00 | O   |
| ATOM | 749 | CB   | ASP | D | 23 | 4.548  | -3.877 | -6.872 | 1.00 | 0.00 | C   |
| ATOM | 750 | CG   | ASP | D | 23 | 5.598  | -2.874 | -7.383 | 1.00 | 0.00 | C   |
| ATOM | 751 | OD1  | ASP | D | 23 | 6.714  | -3.219 | -7.821 | 1.00 | 0.00 | O   |
| ATOM | 752 | OD2  | ASP | D | 23 | 5.302  | -1.663 | -7.273 | 1.00 | 0.00 | O1- |
| ATOM | 753 | H    | ASP | D | 23 | 3.177  | -6.175 | -6.328 | 1.00 | 0.00 | H   |
| ATOM | 754 | N    | VAL | D | 24 | 6.448  | -6.594 | -8.236 | 1.00 | 0.00 | N   |
| ATOM | 755 | CA   | VAL | D | 24 | 7.690  | -7.366 | -8.053 | 1.00 | 0.00 | C   |
| ATOM | 756 | C    | VAL | D | 24 | 8.935  | -6.543 | -8.385 | 1.00 | 0.00 | C   |
| ATOM | 757 | O    | VAL | D | 24 | 9.233  | -6.503 | -9.579 | 1.00 | 0.00 | O   |
| ATOM | 758 | CB   | VAL | D | 24 | 7.742  | -8.755 | -8.684 | 1.00 | 0.00 | C   |
| ATOM | 759 | CG1  | VAL | D | 24 | 8.661  | -9.679 | -7.877 | 1.00 | 0.00 | C   |
| ATOM | 760 | CG2  | VAL | D | 24 | 6.394  | -9.477 | -8.733 | 1.00 | 0.00 | C   |
| ATOM | 761 | H    | VAL | D | 24 | 6.082  | -6.564 | -9.165 | 1.00 | 0.00 | H   |
| ATOM | 762 | N    | GLY | D | 25 | 9.548  | -5.942 | -7.370 | 1.00 | 0.00 | N   |
| ATOM | 763 | CA   | GLY | D | 25 | 10.696 | -5.087 | -7.705 | 1.00 | 0.00 | C   |
| ATOM | 764 | C    | GLY | D | 25 | 12.064 | -5.049 | -7.029 | 1.00 | 0.00 | C   |
| ATOM | 765 | O    | GLY | D | 25 | 12.139 | -5.232 | -5.821 | 1.00 | 0.00 | O   |
| ATOM | 766 | H    | GLY | D | 25 | 9.312  | -6.060 | -6.399 | 1.00 | 0.00 | H   |
| ATOM | 767 | N    | SER | D | 26 | 13.153 | -4.906 | -7.786 | 1.00 | 0.00 | N   |
| ATOM | 768 | CA   | SER | D | 26 | 14.536 | -4.895 | -7.278 | 1.00 | 0.00 | C   |
| ATOM | 769 | C    | SER | D | 26 | 15.225 | -3.544 | -7.463 | 1.00 | 0.00 | C   |
| ATOM | 770 | O    | SER | D | 26 | 15.075 | -2.891 | -8.488 | 1.00 | 0.00 | O   |
| ATOM | 771 | CB   | SER | D | 26 | 15.364 | -5.904 | -8.078 | 1.00 | 0.00 | C   |
| ATOM | 772 | OG   | SER | D | 26 | 16.765 | -5.795 | -7.812 | 1.00 | 0.00 | O   |
| ATOM | 773 | H    | SER | D | 26 | 13.071 | -4.896 | -8.781 | 1.00 | 0.00 | H   |
| ATOM | 774 | HG   | SER | D | 26 | 16.927 | -6.223 | -6.928 | 1.00 | 0.00 | H   |
| ATOM | 775 | N    | ASN | D | 27 | 15.678 | -2.931 | -6.375 | 1.00 | 0.00 | N   |
| ATOM | 776 | CA   | ASN | D | 27 | 16.374 | -1.636 | -6.287 | 1.00 | 0.00 | C   |
| ATOM | 777 | C    | ASN | D | 27 | 15.426 | -0.428 | -6.189 | 1.00 | 0.00 | C   |
| ATOM | 778 | O    | ASN | D | 27 | 15.380 | 0.351  | -7.137 | 1.00 | 0.00 | O   |
| ATOM | 779 | CB   | ASN | D | 27 | 17.462 | -1.420 | -7.341 | 1.00 | 0.00 | C   |
| ATOM | 780 | CG   | ASN | D | 27 | 18.645 | -0.708 | -6.676 | 1.00 | 0.00 | C   |
| ATOM | 781 | ND2  | ASN | D | 27 | 19.863 | -1.224 | -6.782 | 1.00 | 0.00 | N   |
| ATOM | 782 | OD1  | ASN | D | 27 | 18.416 | 0.349  | -6.094 | 1.00 | 0.00 | O   |
| ATOM | 783 | H    | ASN | D | 27 | 15.723 | -3.460 | -5.532 | 1.00 | 0.00 | H   |
| ATOM | 784 | 1HD2 | ASN | D | 27 | 20.043 | -2.013 | -7.370 | 1.00 | 0.00 | H   |
| ATOM | 785 | 2HD2 | ASN | D | 27 | 20.577 | -0.691 | -6.337 | 1.00 | 0.00 | H   |
| ATOM | 786 | N    | LYS | D | 28 | 14.688 | -0.373 | -5.091 | 1.00 | 0.00 | N   |
| ATOM | 787 | CA   | LYS | D | 28 | 13.711 | 0.706  | -4.867 | 1.00 | 0.00 | C   |
| ATOM | 788 | C    | LYS | D | 28 | 14.220 | 1.877  | -4.021 | 1.00 | 0.00 | C   |
| ATOM | 789 | O    | LYS | D | 28 | 14.607 | 1.640  | -2.883 | 1.00 | 0.00 | O   |
| ATOM | 790 | CB   | LYS | D | 28 | 12.437 | 0.135  | -4.233 | 1.00 | 0.00 | C   |
| ATOM | 791 | CG   | LYS | D | 28 | 11.717 | -0.971 | -5.004 | 1.00 | 0.00 | C   |
| ATOM | 792 | CD   | LYS | D | 28 | 10.205 | -1.041 | -4.797 | 1.00 | 0.00 | C   |
| ATOM | 793 | CE   | LYS | D | 28 | 9.692  | -2.407 | -5.264 | 1.00 | 0.00 | C   |
| ATOM | 794 | NZ   | LYS | D | 28 | 8.224  | -2.359 | -5.323 | 1.00 | 0.00 | N1+ |
| ATOM | 795 | H    | LYS | D | 28 | 14.723 | -1.044 | -4.344 | 1.00 | 0.00 | H   |
| ATOM | 796 | HZ1  | LYS | D | 28 | 7.967  | -1.475 | -5.725 | 1.00 | 0.00 | H   |
| ATOM | 797 | HZ2  | LYS | D | 28 | 7.876  | -3.014 | -5.990 | 1.00 | 0.00 | H   |
| ATOM | 798 | HZ3  | LYS | D | 28 | 7.716  | -2.594 | -4.495 | 1.00 | 0.00 | H   |
| ATOM | 799 | N    | GLY | D | 29 | 14.770 | 2.787  | -4.816 | 1.00 | 0.00 | N   |
| ATOM | 800 | CA   | GLY | D | 29 | 15.411 | 3.946  | -4.194 | 1.00 | 0.00 | C   |
| ATOM | 801 | C    | GLY | D | 29 | 14.428 | 4.954  | -3.592 | 1.00 | 0.00 | C   |
| ATOM | 802 | O    | GLY | D | 29 | 13.233 | 5.063  | -3.842 | 1.00 | 0.00 | O   |
| ATOM | 803 | H    | GLY | D | 29 | 14.770 | 2.741  | -5.813 | 1.00 | 0.00 | H   |
| ATOM | 804 | N    | ALA | D | 30 | 15.153 | 5.914  | -3.019 | 1.00 | 0.00 | N   |
| ATOM | 805 | CA   | ALA | D | 30 | 14.744 | 7.116  | -2.285 | 1.00 | 0.00 | C   |
| ATOM | 806 | C    | ALA | D | 30 | 13.315 | 7.249  | -1.771 | 1.00 | 0.00 | C   |
| ATOM | 807 | O    | ALA | D | 30 | 13.067 | 6.924  | -0.610 | 1.00 | 0.00 | O   |
| ATOM | 808 | CB   | ALA | D | 30 | 15.184 | 8.361  | -3.054 | 1.00 | 0.00 | C   |
| ATOM | 809 | H    | ALA | D | 30 | 16.143 | 5.962  | -3.188 | 1.00 | 0.00 | H   |
| ATOM | 810 | N    | ILE | D | 31 | 12.374 | 7.535  | -2.668 | 1.00 | 0.00 | N   |
| ATOM | 811 | CA   | ILE | D | 31 | 10.946 | 7.702  | -2.373 | 1.00 | 0.00 | C   |
| ATOM | 812 | C    | ILE | D | 31 | 10.024 | 6.606  | -2.916 | 1.00 | 0.00 | C   |

|      |     |     |     |   |    |         |        |        |      |      |   |
|------|-----|-----|-----|---|----|---------|--------|--------|------|------|---|
| ATOM | 813 | O   | ILE | D | 31 | 9.430   | 6.659  | -3.996 | 1.00 | 0.00 | O |
| ATOM | 814 | CB  | ILE | D | 31 | 10.436  | 9.106  | -2.707 | 1.00 | 0.00 | C |
| ATOM | 815 | CG1 | ILE | D | 31 | 11.020  | 10.004 | -1.612 | 1.00 | 0.00 | C |
| ATOM | 816 | CG2 | ILE | D | 31 | 8.934   | 9.349  | -2.738 | 1.00 | 0.00 | C |
| ATOM | 817 | CD  | ILE | D | 31 | 10.836  | 11.512 | -1.465 | 1.00 | 0.00 | C |
| ATOM | 818 | H   | ILE | D | 31 | 12.425  | 7.376  | -3.657 | 1.00 | 0.00 | H |
| ATOM | 819 | N   | ILE | D | 32 | 9.830   | 5.686  | -1.977 | 1.00 | 0.00 | N |
| ATOM | 820 | CA  | ILE | D | 32 | 9.084   | 4.474  | -2.312 | 1.00 | 0.00 | C |
| ATOM | 821 | C   | ILE | D | 32 | 7.695   | 4.479  | -1.685 | 1.00 | 0.00 | C |
| ATOM | 822 | O   | ILE | D | 32 | 7.527   | 4.173  | -0.499 | 1.00 | 0.00 | O |
| ATOM | 823 | CB  | ILE | D | 32 | 9.820   | 3.179  | -1.953 | 1.00 | 0.00 | C |
| ATOM | 824 | CG1 | ILE | D | 32 | 11.332  | 3.266  | -2.122 | 1.00 | 0.00 | C |
| ATOM | 825 | CG2 | ILE | D | 32 | 9.348   | 1.976  | -2.784 | 1.00 | 0.00 | C |
| ATOM | 826 | CD  | ILE | D | 32 | 12.147  | 3.615  | -0.876 | 1.00 | 0.00 | C |
| ATOM | 827 | H   | ILE | D | 32 | 10.166  | 5.877  | -1.055 | 1.00 | 0.00 | H |
| ATOM | 828 | N   | GLY | D | 33 | 6.647   | 4.721  | -2.470 | 1.00 | 0.00 | N |
| ATOM | 829 | CA  | GLY | D | 33 | 5.259   | 4.783  | -1.995 | 1.00 | 0.00 | C |
| ATOM | 830 | C   | GLY | D | 33 | 4.272   | 3.723  | -2.492 | 1.00 | 0.00 | C |
| ATOM | 831 | O   | GLY | D | 33 | 4.055   | 3.619  | -3.707 | 1.00 | 0.00 | O |
| ATOM | 832 | H   | GLY | D | 33 | 6.686   | 4.797  | -3.460 | 1.00 | 0.00 | H |
| ATOM | 833 | N   | LEU | D | 34 | 3.429   | 3.146  | -1.656 | 1.00 | 0.00 | N |
| ATOM | 834 | CA  | LEU | D | 34 | 2.269   | 2.283  | -1.899 | 1.00 | 0.00 | C |
| ATOM | 835 | C   | LEU | D | 34 | 1.060   | 3.017  | -1.313 | 1.00 | 0.00 | C |
| ATOM | 836 | O   | LEU | D | 34 | 1.030   | 3.298  | -0.113 | 1.00 | 0.00 | O |
| ATOM | 837 | CB  | LEU | D | 34 | 2.473   | 0.947  | -1.182 | 1.00 | 0.00 | C |
| ATOM | 838 | CG  | LEU | D | 34 | 1.859   | -0.229 | -1.933 | 1.00 | 0.00 | C |
| ATOM | 839 | CD1 | LEU | D | 34 | 2.509   | -0.611 | -3.276 | 1.00 | 0.00 | C |
| ATOM | 840 | CD2 | LEU | D | 34 | 1.794   | -1.484 | -1.050 | 1.00 | 0.00 | C |
| ATOM | 841 | H   | LEU | D | 34 | 3.595   | 3.283  | -0.679 | 1.00 | 0.00 | H |
| ATOM | 842 | N   | MET | D | 35 | 0.329   | 3.511  | -2.314 | 1.00 | 0.00 | N |
| ATOM | 843 | CA  | MET | D | 35 | -0.857  | 4.345  | -2.082 | 1.00 | 0.00 | C |
| ATOM | 844 | C   | MET | D | 35 | -2.113  | 3.506  | -2.316 | 1.00 | 0.00 | C |
| ATOM | 845 | O   | MET | D | 35 | -2.720  | 3.578  | -3.388 | 1.00 | 0.00 | O |
| ATOM | 846 | CB  | MET | D | 35 | -0.857  | 5.641  | -2.899 | 1.00 | 0.00 | C |
| ATOM | 847 | CG  | MET | D | 35 | 0.275   | 6.621  | -2.605 | 1.00 | 0.00 | C |
| ATOM | 848 | SD  | MET | D | 35 | 0.308   | 8.097  | -3.678 | 1.00 | 0.00 | S |
| ATOM | 849 | CE  | MET | D | 35 | 1.452   | 9.025  | -2.675 | 1.00 | 0.00 | C |
| ATOM | 850 | H   | MET | D | 35 | 0.678   | 3.472  | -3.241 | 1.00 | 0.00 | H |
| ATOM | 851 | N   | VAL | D | 36 | -2.577  | 2.820  | -1.268 | 1.00 | 0.00 | N |
| ATOM | 852 | CA  | VAL | D | 36 | -3.640  | 1.829  | -1.460 | 1.00 | 0.00 | C |
| ATOM | 853 | C   | VAL | D | 36 | -5.032  | 2.328  | -1.082 | 1.00 | 0.00 | C |
| ATOM | 854 | O   | VAL | D | 36 | -5.397  | 2.426  | 0.089  | 1.00 | 0.00 | O |
| ATOM | 855 | CB  | VAL | D | 36 | -3.208  | 0.632  | -0.612 | 1.00 | 0.00 | C |
| ATOM | 856 | CG1 | VAL | D | 36 | -4.132  | -0.574 | -0.831 | 1.00 | 0.00 | C |
| ATOM | 857 | CG2 | VAL | D | 36 | -1.876  | 0.122  | -1.169 | 1.00 | 0.00 | C |
| ATOM | 858 | H   | VAL | D | 36 | -2.298  | 2.992  | -0.331 | 1.00 | 0.00 | H |
| ATOM | 859 | N   | GLY | D | 37 | -5.814  | 2.708  | -2.092 | 1.00 | 0.00 | N |
| ATOM | 860 | CA  | GLY | D | 37 | -7.134  | 3.316  | -1.878 | 1.00 | 0.00 | C |
| ATOM | 861 | C   | GLY | D | 37 | -7.394  | 4.596  | -2.675 | 1.00 | 0.00 | C |
| ATOM | 862 | O   | GLY | D | 37 | -7.096  | 4.688  | -3.867 | 1.00 | 0.00 | O |
| ATOM | 863 | H   | GLY | D | 37 | -5.576  | 2.488  | -3.046 | 1.00 | 0.00 | H |
| ATOM | 864 | N   | GLY | D | 38 | -7.916  | 5.536  | -1.901 | 1.00 | 0.00 | N |
| ATOM | 865 | CA  | GLY | D | 38 | -8.123  | 6.919  | -2.341 | 1.00 | 0.00 | C |
| ATOM | 866 | C   | GLY | D | 38 | -9.480  | 7.509  | -1.950 | 1.00 | 0.00 | C |
| ATOM | 867 | O   | GLY | D | 38 | -9.594  | 7.902  | -0.787 | 1.00 | 0.00 | O |
| ATOM | 868 | H   | GLY | D | 38 | -7.897  | 5.421  | -0.906 | 1.00 | 0.00 | H |
| ATOM | 869 | N   | VAL | D | 39 | -10.404 | 7.458  | -2.900 | 1.00 | 0.00 | N |
| ATOM | 870 | CA  | VAL | D | 39 | -11.773 | 7.912  | -2.627 | 1.00 | 0.00 | C |
| ATOM | 871 | C   | VAL | D | 39 | -12.631 | 6.645  | -2.614 | 1.00 | 0.00 | C |
| ATOM | 872 | O   | VAL | D | 39 | -12.706 | 5.988  | -3.654 | 1.00 | 0.00 | O |
| ATOM | 873 | CB  | VAL | D | 39 | -12.126 | 8.930  | -3.710 | 1.00 | 0.00 | C |
| ATOM | 874 | CG1 | VAL | D | 39 | -13.480 | 9.614  | -3.498 | 1.00 | 0.00 | C |
| ATOM | 875 | CG2 | VAL | D | 39 | -11.082 | 10.024 | -3.861 | 1.00 | 0.00 | C |
| ATOM | 876 | H   | VAL | D | 39 | -10.220 | 7.357  | -3.883 | 1.00 | 0.00 | H |
| ATOM | 877 | N   | VAL | D | 40 | -13.246 | 6.370  | -1.472 | 1.00 | 0.00 | N |
| ATOM | 878 | CA  | VAL | D | 40 | -13.945 | 5.110  | -1.170 | 1.00 | 0.00 | C |
| ATOM | 879 | C   | VAL | D | 40 | -15.462 | 5.338  | -1.147 | 1.00 | 0.00 | C |
| ATOM | 880 | O   | VAL | D | 40 | -16.030 | 6.006  | -0.283 | 1.00 | 0.00 | O |

|      |     |     |     |   |    |         |         |         |      |      |   |
|------|-----|-----|-----|---|----|---------|---------|---------|------|------|---|
| ATOM | 881 | CB  | VAL | D | 40 | -13.383 | 4.383   | 0.050   | 1.00 | 0.00 | C |
| ATOM | 882 | CG1 | VAL | D | 40 | -14.026 | 3.003   | 0.249   | 1.00 | 0.00 | C |
| ATOM | 883 | CG2 | VAL | D | 40 | -11.875 | 4.116   | -0.068  | 1.00 | 0.00 | C |
| ATOM | 884 | H   | VAL | D | 40 | -13.231 | 7.037   | -0.726  | 1.00 | 0.00 | H |
| ATOM | 885 | N   | ILE | D | 41 | -16.053 | 4.969   | -2.284  | 1.00 | 0.00 | N |
| ATOM | 886 | CA  | ILE | D | 41 | -17.492 | 5.189   | -2.516  | 1.00 | 0.00 | C |
| ATOM | 887 | C   | ILE | D | 41 | -18.290 | 3.951   | -2.094  | 1.00 | 0.00 | C |
| ATOM | 888 | O   | ILE | D | 41 | -18.574 | 3.113   | -2.934  | 1.00 | 0.00 | O |
| ATOM | 889 | CB  | ILE | D | 41 | -17.739 | 5.682   | -3.947  | 1.00 | 0.00 | C |
| ATOM | 890 | CG1 | ILE | D | 41 | -16.971 | 6.979   | -4.176  | 1.00 | 0.00 | C |
| ATOM | 891 | CG2 | ILE | D | 41 | -19.214 | 5.965   | -4.260  | 1.00 | 0.00 | C |
| ATOM | 892 | CD  | ILE | D | 41 | -16.537 | 7.133   | -5.637  | 1.00 | 0.00 | C |
| ATOM | 893 | H   | ILE | D | 41 | -15.524 | 4.610   | -3.049  | 1.00 | 0.00 | H |
| ATOM | 894 | N   | ALA | D | 42 | -18.712 | 4.002   | -0.831  | 1.00 | 0.00 | N |
| ATOM | 895 | CA  | ALA | D | 42 | -19.182 | 2.888   | 0.007   | 1.00 | 0.00 | C |
| ATOM | 896 | C   | ALA | D | 42 | -20.671 | 2.726   | 0.311   | 1.00 | 0.00 | C |
| ATOM | 897 | CB  | ALA | D | 42 | -18.373 | 2.789   | 1.302   | 1.00 | 0.00 | C |
| ATOM | 898 | O1  | ALA | D | 42 | -21.445 | 3.694   | 0.203   | 1.00 | 0.00 | O |
| ATOM | 899 | O2  | ALA | D | 42 | -21.047 | 1.785   | 1.036   | 1.00 | 0.00 | O |
| ATOM | 900 | H   | ALA | D | 42 | -18.679 | 4.906   | -0.412  | 1.00 | 0.00 | H |
| ATOM | 901 | N   | LEU | E | 17 | -16.118 | -6.141  | -11.299 | 1.00 | 0.00 | N |
| ATOM | 902 | CA  | LEU | E | 17 | -14.948 | -5.402  | -11.797 | 1.00 | 0.00 | C |
| ATOM | 903 | C   | LEU | E | 17 | -13.641 | -5.621  | -11.044 | 1.00 | 0.00 | C |
| ATOM | 904 | O   | LEU | E | 17 | -13.229 | -4.856  | -10.174 | 1.00 | 0.00 | O |
| ATOM | 905 | CB  | LEU | E | 17 | -15.390 | -3.969  | -12.098 | 1.00 | 0.00 | C |
| ATOM | 906 | CG  | LEU | E | 17 | -14.486 | -3.289  | -13.126 | 1.00 | 0.00 | C |
| ATOM | 907 | CD1 | LEU | E | 17 | -14.673 | -3.795  | -14.556 | 1.00 | 0.00 | C |
| ATOM | 908 | CD2 | LEU | E | 17 | -14.876 | -1.807  | -13.081 | 1.00 | 0.00 | C |
| ATOM | 909 | H1  | LEU | E | 17 | -16.905 | -5.703  | -11.720 | 1.00 | 0.00 | H |
| ATOM | 910 | H2  | LEU | E | 17 | -16.155 | -7.097  | -11.598 | 1.00 | 0.00 | H |
| ATOM | 911 | H3  | LEU | E | 17 | -16.169 | -6.146  | -10.302 | 1.00 | 0.00 | H |
| ATOM | 912 | N   | VAL | E | 18 | -12.780 | -6.494  | -11.565 | 1.00 | 0.00 | N |
| ATOM | 913 | CA  | VAL | E | 18 | -11.441 | -6.727  | -10.992 | 1.00 | 0.00 | C |
| ATOM | 914 | C   | VAL | E | 18 | -10.230 | -6.327  | -11.828 | 1.00 | 0.00 | C |
| ATOM | 915 | O   | VAL | E | 18 | -10.249 | -6.177  | -13.052 | 1.00 | 0.00 | O |
| ATOM | 916 | CB  | VAL | E | 18 | -11.292 | -8.140  | -10.423 | 1.00 | 0.00 | C |
| ATOM | 917 | CG1 | VAL | E | 18 | -12.259 | -8.495  | -9.297  | 1.00 | 0.00 | C |
| ATOM | 918 | CG2 | VAL | E | 18 | -11.467 | -9.124  | -11.576 | 1.00 | 0.00 | C |
| ATOM | 919 | H   | VAL | E | 18 | -13.016 | -7.074  | -12.340 | 1.00 | 0.00 | H |
| ATOM | 920 | N   | PHE | E | 19 | -9.157  | -5.903  | -11.160 | 1.00 | 0.00 | N |
| ATOM | 921 | CA  | PHE | E | 19 | -7.899  | -5.534  | -11.809 | 1.00 | 0.00 | C |
| ATOM | 922 | C   | PHE | E | 19 | -6.648  | -6.248  | -11.292 | 1.00 | 0.00 | C |
| ATOM | 923 | O   | PHE | E | 19 | -6.168  | -6.221  | -10.162 | 1.00 | 0.00 | O |
| ATOM | 924 | CB  | PHE | E | 19 | -7.590  | -4.034  | -11.777 | 1.00 | 0.00 | C |
| ATOM | 925 | CG  | PHE | E | 19 | -6.624  | -3.479  | -12.825 | 1.00 | 0.00 | C |
| ATOM | 926 | CD1 | PHE | E | 19 | -6.691  | -3.934  | -14.145 | 1.00 | 0.00 | C |
| ATOM | 927 | CD2 | PHE | E | 19 | -5.632  | -2.591  | -12.430 | 1.00 | 0.00 | C |
| ATOM | 928 | CE1 | PHE | E | 19 | -5.733  | -3.513  | -15.059 | 1.00 | 0.00 | C |
| ATOM | 929 | CE2 | PHE | E | 19 | -4.675  | -2.226  | -13.364 | 1.00 | 0.00 | C |
| ATOM | 930 | CZ  | PHE | E | 19 | -4.676  | -2.707  | -14.671 | 1.00 | 0.00 | C |
| ATOM | 931 | H   | PHE | E | 19 | -9.154  | -5.606  | -10.207 | 1.00 | 0.00 | H |
| ATOM | 932 | HD1 | PHE | E | 19 | -7.589  | -4.466  | -14.433 | 1.00 | 0.00 | H |
| ATOM | 933 | HD2 | PHE | E | 19 | -5.540  | -2.253  | -11.395 | 1.00 | 0.00 | H |
| ATOM | 934 | HE1 | PHE | E | 19 | -5.800  | -3.778  | -16.117 | 1.00 | 0.00 | H |
| ATOM | 935 | HE2 | PHE | E | 19 | -3.835  | -1.631  | -13.005 | 1.00 | 0.00 | H |
| ATOM | 936 | HZ  | PHE | E | 19 | -3.892  | -2.372  | -15.351 | 1.00 | 0.00 | H |
| ATOM | 937 | N   | PHE | E | 20 | -6.121  | -7.127  | -12.137 | 1.00 | 0.00 | N |
| ATOM | 938 | CA  | PHE | E | 20 | -4.827  | -7.792  | -11.925 | 1.00 | 0.00 | C |
| ATOM | 939 | C   | PHE | E | 20 | -3.647  | -7.042  | -12.557 | 1.00 | 0.00 | C |
| ATOM | 940 | O   | PHE | E | 20 | -3.179  | -7.394  | -13.635 | 1.00 | 0.00 | O |
| ATOM | 941 | CB  | PHE | E | 20 | -5.028  | -9.262  | -12.270 | 1.00 | 0.00 | C |
| ATOM | 942 | CG  | PHE | E | 20 | -5.659  | -9.984  | -11.069 | 1.00 | 0.00 | C |
| ATOM | 943 | CD1 | PHE | E | 20 | -7.039  | -10.131 | -11.096 | 1.00 | 0.00 | C |
| ATOM | 944 | CD2 | PHE | E | 20 | -4.823  | -10.642 | -10.174 | 1.00 | 0.00 | C |
| ATOM | 945 | CE1 | PHE | E | 20 | -7.633  | -10.763 | -10.014 | 1.00 | 0.00 | C |
| ATOM | 946 | CE2 | PHE | E | 20 | -5.429  | -11.405 | -9.180  | 1.00 | 0.00 | C |
| ATOM | 947 | CZ  | PHE | E | 20 | -6.822  | -11.458 | -9.132  | 1.00 | 0.00 | C |
| ATOM | 948 | H   | PHE | E | 20 | -6.627  | -7.367  | -12.975 | 1.00 | 0.00 | H |

|      |      |      |     |   |    |        |         |         |      |      |     |
|------|------|------|-----|---|----|--------|---------|---------|------|------|-----|
| ATOM | 949  | HD1  | PHE | E | 20 | -7.676 | -9.527  | -11.743 | 1.00 | 0.00 | H   |
| ATOM | 950  | HD2  | PHE | E | 20 | -3.747 | -10.630 | -10.349 | 1.00 | 0.00 | H   |
| ATOM | 951  | HE1  | PHE | E | 20 | -8.710 | -10.912 | -9.917  | 1.00 | 0.00 | H   |
| ATOM | 952  | HE2  | PHE | E | 20 | -4.753 | -11.866 | -8.468  | 1.00 | 0.00 | H   |
| ATOM | 953  | HZ   | PHE | E | 20 | -7.233 | -12.144 | -8.391  | 1.00 | 0.00 | H   |
| ATOM | 954  | N    | ALA | E | 21 | -3.044 | -6.303  | -11.627 | 1.00 | 0.00 | N   |
| ATOM | 955  | CA   | ALA | E | 21 | -1.975 | -5.347  | -11.947 | 1.00 | 0.00 | C   |
| ATOM | 956  | C    | ALA | E | 21 | -0.635 | -5.969  | -11.540 | 1.00 | 0.00 | C   |
| ATOM | 957  | O    | ALA | E | 21 | -0.319 | -6.206  | -10.379 | 1.00 | 0.00 | O   |
| ATOM | 958  | CB   | ALA | E | 21 | -2.298 | -4.126  | -11.086 | 1.00 | 0.00 | C   |
| ATOM | 959  | H    | ALA | E | 21 | -3.432 | -6.273  | -10.707 | 1.00 | 0.00 | H   |
| ATOM | 960  | N    | GLU | E | 22 | 0.125  | -6.191  | -12.609 | 1.00 | 0.00 | N   |
| ATOM | 961  | CA   | GLU | E | 22 | 1.379  | -6.942  | -12.492 | 1.00 | 0.00 | C   |
| ATOM | 962  | C    | GLU | E | 22 | 2.574  | -6.220  | -13.119 | 1.00 | 0.00 | C   |
| ATOM | 963  | O    | GLU | E | 22 | 2.689  | -6.302  | -14.337 | 1.00 | 0.00 | O   |
| ATOM | 964  | CB   | GLU | E | 22 | 1.160  | -8.202  | -13.341 | 1.00 | 0.00 | C   |
| ATOM | 965  | CG   | GLU | E | 22 | 2.271  | -9.246  | -13.269 | 1.00 | 0.00 | C   |
| ATOM | 966  | CD   | GLU | E | 22 | 1.990  | -10.498 | -14.118 | 1.00 | 0.00 | C   |
| ATOM | 967  | OE1  | GLU | E | 22 | 2.054  | -11.624 | -13.587 | 1.00 | 0.00 | O   |
| ATOM | 968  | OE2  | GLU | E | 22 | 1.850  | -10.416 | -15.358 | 1.00 | 0.00 | O1- |
| ATOM | 969  | H    | GLU | E | 22 | -0.262 | -6.217  | -13.538 | 1.00 | 0.00 | H   |
| ATOM | 970  | N    | ASP | E | 23 | 3.464  | -5.736  | -12.254 | 1.00 | 0.00 | N   |
| ATOM | 971  | CA   | ASP | E | 23 | 4.682  | -4.978  | -12.574 | 1.00 | 0.00 | C   |
| ATOM | 972  | C    | ASP | E | 23 | 5.904  | -5.799  | -12.169 | 1.00 | 0.00 | C   |
| ATOM | 973  | O    | ASP | E | 23 | 6.034  | -6.120  | -10.989 | 1.00 | 0.00 | O   |
| ATOM | 974  | CB   | ASP | E | 23 | 4.676  | -3.575  | -11.967 | 1.00 | 0.00 | C   |
| ATOM | 975  | CG   | ASP | E | 23 | 5.776  | -2.599  | -12.393 | 1.00 | 0.00 | C   |
| ATOM | 976  | OD1  | ASP | E | 23 | 6.824  | -3.042  | -12.903 | 1.00 | 0.00 | O   |
| ATOM | 977  | OD2  | ASP | E | 23 | 5.621  | -1.364  | -12.240 | 1.00 | 0.00 | O1- |
| ATOM | 978  | H    | ASP | E | 23 | 3.458  | -6.062  | -11.313 | 1.00 | 0.00 | H   |
| ATOM | 979  | N    | VAL | E | 24 | 6.839  | -5.708  | -13.115 | 1.00 | 0.00 | N   |
| ATOM | 980  | CA   | VAL | E | 24 | 8.169  | -6.345  | -13.081 | 1.00 | 0.00 | C   |
| ATOM | 981  | C    | VAL | E | 24 | 9.360  | -5.429  | -13.357 | 1.00 | 0.00 | C   |
| ATOM | 982  | O    | VAL | E | 24 | 9.770  | -5.202  | -14.485 | 1.00 | 0.00 | O   |
| ATOM | 983  | CB   | VAL | E | 24 | 8.265  | -7.640  | -13.882 | 1.00 | 0.00 | C   |
| ATOM | 984  | CG1  | VAL | E | 24 | 7.524  | -8.732  | -13.091 | 1.00 | 0.00 | C   |
| ATOM | 985  | CG2  | VAL | E | 24 | 7.718  | -7.450  | -15.302 | 1.00 | 0.00 | C   |
| ATOM | 986  | H    | VAL | E | 24 | 6.837  | -4.855  | -13.621 | 1.00 | 0.00 | H   |
| ATOM | 987  | N    | GLY | E | 25 | 10.139 | -5.066  | -12.345 | 1.00 | 0.00 | N   |
| ATOM | 988  | CA   | GLY | E | 25 | 11.227 | -4.092  | -12.466 | 1.00 | 0.00 | C   |
| ATOM | 989  | C    | GLY | E | 25 | 12.507 | -4.505  | -11.728 | 1.00 | 0.00 | C   |
| ATOM | 990  | O    | GLY | E | 25 | 12.500 | -4.799  | -10.539 | 1.00 | 0.00 | O   |
| ATOM | 991  | H    | GLY | E | 25 | 9.834  | -5.147  | -11.388 | 1.00 | 0.00 | H   |
| ATOM | 992  | N    | SER | E | 26 | 13.659 | -4.397  | -12.399 | 1.00 | 0.00 | N   |
| ATOM | 993  | CA   | SER | E | 26 | 15.038 | -4.366  | -11.895 | 1.00 | 0.00 | C   |
| ATOM | 994  | C    | SER | E | 26 | 15.569 | -2.961  | -12.187 | 1.00 | 0.00 | C   |
| ATOM | 995  | O    | SER | E | 26 | 15.461 | -2.527  | -13.337 | 1.00 | 0.00 | O   |
| ATOM | 996  | CB   | SER | E | 26 | 16.025 | -5.193  | -12.711 | 1.00 | 0.00 | C   |
| ATOM | 997  | OG   | SER | E | 26 | 15.976 | -6.621  | -12.611 | 1.00 | 0.00 | O   |
| ATOM | 998  | H    | SER | E | 26 | 13.555 | -4.380  | -13.394 | 1.00 | 0.00 | H   |
| ATOM | 999  | HG   | SER | E | 26 | 15.960 | -7.055  | -13.510 | 1.00 | 0.00 | H   |
| ATOM | 1000 | N    | ASN | E | 27 | 15.582 | -2.176  | -11.106 | 1.00 | 0.00 | N   |
| ATOM | 1001 | CA   | ASN | E | 27 | 15.890 | -0.729  | -11.085 | 1.00 | 0.00 | C   |
| ATOM | 1002 | C    | ASN | E | 27 | 14.678 | 0.206   | -11.134 | 1.00 | 0.00 | C   |
| ATOM | 1003 | O    | ASN | E | 27 | 14.220 | 0.575   | -12.212 | 1.00 | 0.00 | O   |
| ATOM | 1004 | CB   | ASN | E | 27 | 17.011 | -0.258  | -12.012 | 1.00 | 0.00 | C   |
| ATOM | 1005 | CG   | ASN | E | 27 | 18.376 | -0.494  | -11.358 | 1.00 | 0.00 | C   |
| ATOM | 1006 | ND2  | ASN | E | 27 | 18.931 | 0.529   | -10.711 | 1.00 | 0.00 | N   |
| ATOM | 1007 | OD1  | ASN | E | 27 | 18.822 | -1.641  | -11.322 | 1.00 | 0.00 | O   |
| ATOM | 1008 | H    | ASN | E | 27 | 15.272 | -2.410  | -10.193 | 1.00 | 0.00 | H   |
| ATOM | 1009 | 1HD2 | ASN | E | 27 | 18.590 | 1.459   | -10.682 | 1.00 | 0.00 | H   |
| ATOM | 1010 | 2HD2 | ASN | E | 27 | 19.734 | 0.268   | -10.179 | 1.00 | 0.00 | H   |
| ATOM | 1011 | N    | LYS | E | 28 | 14.165 | 0.456   | -9.935  | 1.00 | 0.00 | N   |
| ATOM | 1012 | CA   | LYS | E | 28 | 13.177 | 1.503   | -9.644  | 1.00 | 0.00 | C   |
| ATOM | 1013 | C    | LYS | E | 28 | 13.889 | 2.741   | -9.120  | 1.00 | 0.00 | C   |
| ATOM | 1014 | O    | LYS | E | 28 | 14.401 | 2.926   | -8.009  | 1.00 | 0.00 | O   |
| ATOM | 1015 | CB   | LYS | E | 28 | 12.170 | 0.934   | -8.632  | 1.00 | 0.00 | C   |
| ATOM | 1016 | CG   | LYS | E | 28 | 11.334 | -0.234  | -9.155  | 1.00 | 0.00 | C   |

|      |      |     |     |   |    |        |        |         |      |      |     |
|------|------|-----|-----|---|----|--------|--------|---------|------|------|-----|
| ATOM | 1017 | CD  | LYS | E | 28 | 10.265 | 0.352  | -10.081 | 1.00 | 0.00 | C   |
| ATOM | 1018 | CE  | LYS | E | 28 | 9.188  | -0.640 | -10.507 | 1.00 | 0.00 | C   |
| ATOM | 1019 | NZ  | LYS | E | 28 | 8.416  | -0.139 | -11.660 | 1.00 | 0.00 | N1+ |
| ATOM | 1020 | H   | LYS | E | 28 | 14.528 | 0.015  | -9.116  | 1.00 | 0.00 | H   |
| ATOM | 1021 | HZ1 | LYS | E | 28 | 7.756  | 0.529  | -11.302 | 1.00 | 0.00 | H   |
| ATOM | 1022 | HZ2 | LYS | E | 28 | 9.056  | 0.141  | -12.377 | 1.00 | 0.00 | H   |
| ATOM | 1023 | HZ3 | LYS | E | 28 | 7.880  | -0.922 | -11.954 | 1.00 | 0.00 | H   |
| ATOM | 1024 | N   | GLY | E | 29 | 14.128 | 3.625  | -10.084 | 1.00 | 0.00 | N   |
| ATOM | 1025 | CA  | GLY | E | 29 | 14.752 | 4.923  | -9.832  | 1.00 | 0.00 | C   |
| ATOM | 1026 | C   | GLY | E | 29 | 13.971 | 5.955  | -9.017  | 1.00 | 0.00 | C   |
| ATOM | 1027 | O   | GLY | E | 29 | 12.775 | 6.198  | -9.209  | 1.00 | 0.00 | O   |
| ATOM | 1028 | H   | GLY | E | 29 | 13.674 | 3.479  | -10.970 | 1.00 | 0.00 | H   |
| ATOM | 1029 | N   | ALA | E | 30 | 14.737 | 6.620  | -8.160  | 1.00 | 0.00 | N   |
| ATOM | 1030 | CA  | ALA | E | 30 | 14.407 | 7.725  | -7.238  | 1.00 | 0.00 | C   |
| ATOM | 1031 | C   | ALA | E | 30 | 13.029 | 7.851  | -6.581  | 1.00 | 0.00 | C   |
| ATOM | 1032 | O   | ALA | E | 30 | 12.831 | 7.772  | -5.363  | 1.00 | 0.00 | O   |
| ATOM | 1033 | CB  | ALA | E | 30 | 14.782 | 9.005  | -7.971  | 1.00 | 0.00 | C   |
| ATOM | 1034 | H   | ALA | E | 30 | 15.628 | 6.201  | -7.989  | 1.00 | 0.00 | H   |
| ATOM | 1035 | N   | ILE | E | 31 | 12.052 | 8.061  | -7.454  | 1.00 | 0.00 | N   |
| ATOM | 1036 | CA  | ILE | E | 31 | 10.678 | 8.485  | -7.175  | 1.00 | 0.00 | C   |
| ATOM | 1037 | C   | ILE | E | 31 | 9.768  | 7.411  | -7.784  | 1.00 | 0.00 | C   |
| ATOM | 1038 | O   | ILE | E | 31 | 9.337  | 7.328  | -8.935  | 1.00 | 0.00 | O   |
| ATOM | 1039 | CB  | ILE | E | 31 | 10.365 | 9.800  | -7.885  | 1.00 | 0.00 | C   |
| ATOM | 1040 | CG1 | ILE | E | 31 | 11.372 | 10.887 | -7.495  | 1.00 | 0.00 | C   |
| ATOM | 1041 | CG2 | ILE | E | 31 | 8.957  | 10.273 | -7.523  | 1.00 | 0.00 | C   |
| ATOM | 1042 | CD  | ILE | E | 31 | 11.312 | 12.185 | -8.290  | 1.00 | 0.00 | C   |
| ATOM | 1043 | H   | ILE | E | 31 | 12.227 | 7.548  | -8.303  | 1.00 | 0.00 | H   |
| ATOM | 1044 | N   | ILE | E | 32 | 9.258  | 6.531  | -6.914  | 1.00 | 0.00 | N   |
| ATOM | 1045 | CA  | ILE | E | 32 | 8.365  | 5.409  | -7.220  | 1.00 | 0.00 | C   |
| ATOM | 1046 | C   | ILE | E | 32 | 7.129  | 5.335  | -6.319  | 1.00 | 0.00 | C   |
| ATOM | 1047 | O   | ILE | E | 32 | 7.163  | 4.786  | -5.218  | 1.00 | 0.00 | O   |
| ATOM | 1048 | CB  | ILE | E | 32 | 9.132  | 4.080  | -7.282  | 1.00 | 0.00 | C   |
| ATOM | 1049 | CG1 | ILE | E | 32 | 10.135 | 3.749  | -6.175  | 1.00 | 0.00 | C   |
| ATOM | 1050 | CG2 | ILE | E | 32 | 9.728  | 3.875  | -8.675  | 1.00 | 0.00 | C   |
| ATOM | 1051 | CD  | ILE | E | 32 | 11.532 | 4.348  | -6.360  | 1.00 | 0.00 | C   |
| ATOM | 1052 | H   | ILE | E | 32 | 9.597  | 6.487  | -5.981  | 1.00 | 0.00 | H   |
| ATOM | 1053 | N   | GLY | E | 33 | 6.119  | 6.011  | -6.846  | 1.00 | 0.00 | N   |
| ATOM | 1054 | CA  | GLY | E | 33 | 4.802  | 6.078  | -6.181  | 1.00 | 0.00 | C   |
| ATOM | 1055 | C   | GLY | E | 33 | 3.686  | 5.272  | -6.862  | 1.00 | 0.00 | C   |
| ATOM | 1056 | O   | GLY | E | 33 | 3.273  | 5.680  | -7.938  | 1.00 | 0.00 | O   |
| ATOM | 1057 | H   | GLY | E | 33 | 6.323  | 6.744  | -7.499  | 1.00 | 0.00 | H   |
| ATOM | 1058 | N   | LEU | E | 34 | 3.309  | 4.118  | -6.303  | 1.00 | 0.00 | N   |
| ATOM | 1059 | CA  | LEU | E | 34 | 2.285  | 3.233  | -6.881  | 1.00 | 0.00 | C   |
| ATOM | 1060 | C   | LEU | E | 34 | 0.874  | 3.448  | -6.330  | 1.00 | 0.00 | C   |
| ATOM | 1061 | O   | LEU | E | 34 | 0.701  | 3.458  | -5.108  | 1.00 | 0.00 | O   |
| ATOM | 1062 | CB  | LEU | E | 34 | 2.705  | 1.766  | -6.878  | 1.00 | 0.00 | C   |
| ATOM | 1063 | CG  | LEU | E | 34 | 1.765  | 0.773  | -7.581  | 1.00 | 0.00 | C   |
| ATOM | 1064 | CD1 | LEU | E | 34 | 1.954  | 0.800  | -9.095  | 1.00 | 0.00 | C   |
| ATOM | 1065 | CD2 | LEU | E | 34 | 1.893  | -0.646 | -7.031  | 1.00 | 0.00 | C   |
| ATOM | 1066 | H   | LEU | E | 34 | 3.696  | 3.846  | -5.423  | 1.00 | 0.00 | H   |
| ATOM | 1067 | N   | MET | E | 35 | -0.007 | 3.913  | -7.210  | 1.00 | 0.00 | N   |
| ATOM | 1068 | CA  | MET | E | 35 | -1.406 | 4.173  | -6.831  | 1.00 | 0.00 | C   |
| ATOM | 1069 | C   | MET | E | 35 | -2.325 | 3.031  | -7.285  | 1.00 | 0.00 | C   |
| ATOM | 1070 | O   | MET | E | 35 | -2.392 | 2.625  | -8.441  | 1.00 | 0.00 | O   |
| ATOM | 1071 | CB  | MET | E | 35 | -1.852 | 5.544  | -7.374  | 1.00 | 0.00 | C   |
| ATOM | 1072 | CG  | MET | E | 35 | -2.434 | 6.286  | -6.178  | 1.00 | 0.00 | C   |
| ATOM | 1073 | SD  | MET | E | 35 | -4.004 | 5.532  | -5.615  | 1.00 | 0.00 | S   |
| ATOM | 1074 | CE  | MET | E | 35 | -4.696 | 6.856  | -4.640  | 1.00 | 0.00 | C   |
| ATOM | 1075 | H   | MET | E | 35 | 0.253  | 4.070  | -8.159  | 1.00 | 0.00 | H   |
| ATOM | 1076 | N   | VAL | E | 36 | -2.869 | 2.458  | -6.214  | 1.00 | 0.00 | N   |
| ATOM | 1077 | CA  | VAL | E | 36 | -3.723 | 1.265  | -6.255  | 1.00 | 0.00 | C   |
| ATOM | 1078 | C   | VAL | E | 36 | -5.142 | 1.730  | -5.921  | 1.00 | 0.00 | C   |
| ATOM | 1079 | O   | VAL | E | 36 | -5.443 | 2.181  | -4.813  | 1.00 | 0.00 | O   |
| ATOM | 1080 | CB  | VAL | E | 36 | -3.327 | 0.290  | -5.150  | 1.00 | 0.00 | C   |
| ATOM | 1081 | CG1 | VAL | E | 36 | -3.837 | -1.108 | -5.509  | 1.00 | 0.00 | C   |
| ATOM | 1082 | CG2 | VAL | E | 36 | -1.811 | 0.189  | -4.971  | 1.00 | 0.00 | C   |
| ATOM | 1083 | H   | VAL | E | 36 | -2.734 | 2.903  | -5.331  | 1.00 | 0.00 | H   |
| ATOM | 1084 | N   | GLY | E | 37 | -5.803 | 2.088  | -7.012  | 1.00 | 0.00 | N   |

|      |      |     |     |   |    |         |        |        |      |      |   |
|------|------|-----|-----|---|----|---------|--------|--------|------|------|---|
| ATOM | 1085 | CA  | GLY | E | 37 | -7.260  | 2.333  | -6.963 | 1.00 | 0.00 | C |
| ATOM | 1086 | C   | GLY | E | 37 | -7.558  | 3.726  | -7.535 | 1.00 | 0.00 | C |
| ATOM | 1087 | O   | GLY | E | 37 | -7.583  | 3.906  | -8.754 | 1.00 | 0.00 | O |
| ATOM | 1088 | H   | GLY | E | 37 | -5.225  | 2.480  | -7.726 | 1.00 | 0.00 | H |
| ATOM | 1089 | N   | GLY | E | 38 | -7.611  | 4.705  | -6.639 | 1.00 | 0.00 | N |
| ATOM | 1090 | CA  | GLY | E | 38 | -8.042  | 6.062  | -6.977 | 1.00 | 0.00 | C |
| ATOM | 1091 | C   | GLY | E | 38 | -9.509  | 6.293  | -6.631 | 1.00 | 0.00 | C |
| ATOM | 1092 | O   | GLY | E | 38 | -9.801  | 6.548  | -5.469 | 1.00 | 0.00 | O |
| ATOM | 1093 | H   | GLY | E | 38 | -7.244  | 4.614  | -5.709 | 1.00 | 0.00 | H |
| ATOM | 1094 | N   | VAL | E | 39 | -10.341 | 6.442  | -7.660 | 1.00 | 0.00 | N |
| ATOM | 1095 | CA  | VAL | E | 39 | -11.787 | 6.368  | -7.373 | 1.00 | 0.00 | C |
| ATOM | 1096 | C   | VAL | E | 39 | -12.338 | 4.939  | -7.320 | 1.00 | 0.00 | C |
| ATOM | 1097 | O   | VAL | E | 39 | -12.425 | 4.291  | -8.361 | 1.00 | 0.00 | O |
| ATOM | 1098 | CB  | VAL | E | 39 | -12.464 | 7.210  | -8.457 | 1.00 | 0.00 | C |
| ATOM | 1099 | CG1 | VAL | E | 39 | -13.984 | 7.290  | -8.266 | 1.00 | 0.00 | C |
| ATOM | 1100 | CG2 | VAL | E | 39 | -11.843 | 8.591  | -8.686 | 1.00 | 0.00 | C |
| ATOM | 1101 | H   | VAL | E | 39 | -10.076 | 6.191  | -8.588 | 1.00 | 0.00 | H |
| ATOM | 1102 | N   | VAL | E | 40 | -12.618 | 4.538  | -6.083 | 1.00 | 0.00 | N |
| ATOM | 1103 | CA  | VAL | E | 40 | -13.084 | 3.189  | -5.721 | 1.00 | 0.00 | C |
| ATOM | 1104 | C   | VAL | E | 40 | -14.531 | 3.074  | -5.244 | 1.00 | 0.00 | C |
| ATOM | 1105 | O   | VAL | E | 40 | -15.009 | 3.845  | -4.422 | 1.00 | 0.00 | O |
| ATOM | 1106 | CB  | VAL | E | 40 | -12.027 | 2.543  | -4.825 | 1.00 | 0.00 | C |
| ATOM | 1107 | CG1 | VAL | E | 40 | -12.383 | 1.149  | -4.306 | 1.00 | 0.00 | C |
| ATOM | 1108 | CG2 | VAL | E | 40 | -10.612 | 2.520  | -5.409 | 1.00 | 0.00 | C |
| ATOM | 1109 | H   | VAL | E | 40 | -12.377 | 5.138  | -5.322 | 1.00 | 0.00 | H |
| ATOM | 1110 | N   | ILE | E | 41 | -15.270 | 2.372  | -6.106 | 1.00 | 0.00 | N |
| ATOM | 1111 | CA  | ILE | E | 41 | -16.678 | 1.990  | -5.969 | 1.00 | 0.00 | C |
| ATOM | 1112 | C   | ILE | E | 41 | -16.710 | 0.541  | -5.469 | 1.00 | 0.00 | C |
| ATOM | 1113 | O   | ILE | E | 41 | -15.954 | -0.304 | -5.951 | 1.00 | 0.00 | O |
| ATOM | 1114 | CB  | ILE | E | 41 | -17.490 | 2.227  | -7.237 | 1.00 | 0.00 | C |
| ATOM | 1115 | CG1 | ILE | E | 41 | -17.977 | 3.676  | -7.214 | 1.00 | 0.00 | C |
| ATOM | 1116 | CG2 | ILE | E | 41 | -18.640 | 1.230  | -7.365 | 1.00 | 0.00 | C |
| ATOM | 1117 | CD  | ILE | E | 41 | -17.285 | 4.349  | -8.408 | 1.00 | 0.00 | C |
| ATOM | 1118 | H   | ILE | E | 41 | -14.946 | 2.243  | -7.047 | 1.00 | 0.00 | H |
| ATOM | 1119 | N   | ALA | E | 42 | -17.340 | 0.411  | -4.311 | 1.00 | 0.00 | N |
| ATOM | 1120 | CA  | ALA | E | 42 | -17.511 | -0.893 | -3.651 | 1.00 | 0.00 | C |
| ATOM | 1121 | C   | ALA | E | 42 | -18.471 | -1.916 | -4.267 | 1.00 | 0.00 | C |
| ATOM | 1122 | CB  | ALA | E | 42 | -17.825 | -0.642 | -2.183 | 1.00 | 0.00 | C |
| ATOM | 1123 | O1  | ALA | E | 42 | -18.196 | -3.077 | -3.878 | 1.00 | 0.00 | O |
| ATOM | 1124 | O2  | ALA | E | 42 | -19.333 | -1.661 | -5.131 | 1.00 | 0.00 | O |
| ATOM | 1125 | H   | ALA | E | 42 | -17.867 | 1.114  | -3.831 | 1.00 | 0.00 | H |

END

#### 4. A $\beta$ <sub>42</sub> protofibril-6n complex

|      |    |     |     |   |    |         |        |        |      |      |   |
|------|----|-----|-----|---|----|---------|--------|--------|------|------|---|
| ATOM | 1  | N   | LEU | A | 17 | -13.204 | -1.422 | 8.141  | 1.00 | 0.00 | N |
| ATOM | 2  | CA  | LEU | A | 17 | -12.511 | -2.613 | 7.643  | 1.00 | 0.00 | C |
| ATOM | 3  | C   | LEU | A | 17 | -11.377 | -2.873 | 8.637  | 1.00 | 0.00 | C |
| ATOM | 4  | O   | LEU | A | 17 | -10.707 | -2.002 | 9.189  | 1.00 | 0.00 | O |
| ATOM | 5  | CB  | LEU | A | 17 | -11.945 | -2.529 | 6.215  | 1.00 | 0.00 | C |
| ATOM | 6  | CG  | LEU | A | 17 | -13.006 | -2.216 | 5.160  | 1.00 | 0.00 | C |
| ATOM | 7  | CD1 | LEU | A | 17 | -12.257 | -1.332 | 4.161  | 1.00 | 0.00 | C |
| ATOM | 8  | CD2 | LEU | A | 17 | -13.490 | -3.531 | 4.547  | 1.00 | 0.00 | C |
| ATOM | 9  | H1  | LEU | A | 17 | -14.151 | -1.635 | 8.375  | 1.00 | 0.00 | H |
| ATOM | 10 | H2  | LEU | A | 17 | -12.788 | -1.106 | 8.995  | 1.00 | 0.00 | H |
| ATOM | 11 | H3  | LEU | A | 17 | -13.142 | -0.686 | 7.471  | 1.00 | 0.00 | H |
| ATOM | 12 | N   | VAL | A | 18 | -11.030 | -4.156 | 8.662  | 1.00 | 0.00 | N |
| ATOM | 13 | CA  | VAL | A | 18 | -9.890  | -4.505 | 9.527  | 1.00 | 0.00 | C |
| ATOM | 14 | C   | VAL | A | 18 | -8.644  | -4.376 | 8.645  | 1.00 | 0.00 | C |
| ATOM | 15 | O   | VAL | A | 18 | -8.417  | -5.222 | 7.786  | 1.00 | 0.00 | O |
| ATOM | 16 | CB  | VAL | A | 18 | -9.950  | -5.927 | 10.082 | 1.00 | 0.00 | C |
| ATOM | 17 | CG1 | VAL | A | 18 | -8.783  | -6.197 | 11.045 | 1.00 | 0.00 | C |
| ATOM | 18 | CG2 | VAL | A | 18 | -11.282 | -6.207 | 10.778 | 1.00 | 0.00 | C |
| ATOM | 19 | H   | VAL | A | 18 | -11.509 | -4.813 | 8.080  | 1.00 | 0.00 | H |
| ATOM | 20 | N   | PHE | A | 19 | -8.049  | -3.197 | 8.725  | 1.00 | 0.00 | N |
| ATOM | 21 | CA  | PHE | A | 19 | -6.735  | -2.893 | 8.127  | 1.00 | 0.00 | C |
| ATOM | 22 | C   | PHE | A | 19 | -5.566  | -3.607 | 8.812  | 1.00 | 0.00 | C |
| ATOM | 23 | O   | PHE | A | 19 | -5.242  | -3.460 | 9.981  | 1.00 | 0.00 | O |

|      |    |     |     |   |    |         |         |        |      |      |     |
|------|----|-----|-----|---|----|---------|---------|--------|------|------|-----|
| ATOM | 24 | CB  | PHE | A | 19 | -6.434  | -1.396  | 7.994  | 1.00 | 0.00 | C   |
| ATOM | 25 | CG  | PHE | A | 19 | -7.439  | -0.432  | 7.361  | 1.00 | 0.00 | C   |
| ATOM | 26 | CD1 | PHE | A | 19 | -8.375  | 0.222   | 8.158  | 1.00 | 0.00 | C   |
| ATOM | 27 | CD2 | PHE | A | 19 | -7.413  | -0.308  | 5.972  | 1.00 | 0.00 | C   |
| ATOM | 28 | CE1 | PHE | A | 19 | -9.313  | 1.008   | 7.502  | 1.00 | 0.00 | C   |
| ATOM | 29 | CE2 | PHE | A | 19 | -8.393  | 0.462   | 5.370  | 1.00 | 0.00 | C   |
| ATOM | 30 | CZ  | PHE | A | 19 | -9.335  | 1.171   | 6.118  | 1.00 | 0.00 | C   |
| ATOM | 31 | H   | PHE | A | 19 | -8.370  | -2.542  | 9.409  | 1.00 | 0.00 | H   |
| ATOM | 32 | HD1 | PHE | A | 19 | -8.493  | 0.045   | 9.218  | 1.00 | 0.00 | H   |
| ATOM | 33 | HD2 | PHE | A | 19 | -6.655  | -0.760  | 5.344  | 1.00 | 0.00 | H   |
| ATOM | 34 | HE1 | PHE | A | 19 | -9.848  | 1.666   | 8.185  | 1.00 | 0.00 | H   |
| ATOM | 35 | HE2 | PHE | A | 19 | -8.503  | 0.303   | 4.296  | 1.00 | 0.00 | H   |
| ATOM | 36 | HZ  | PHE | A | 19 | -10.198 | 1.629   | 5.643  | 1.00 | 0.00 | H   |
| ATOM | 37 | N   | PHE | A | 20 | -4.911  | -4.509  | 8.090  | 1.00 | 0.00 | N   |
| ATOM | 38 | CA  | PHE | A | 20 | -3.753  | -5.280  | 8.569  | 1.00 | 0.00 | C   |
| ATOM | 39 | C   | PHE | A | 20 | -2.487  | -5.027  | 7.746  | 1.00 | 0.00 | C   |
| ATOM | 40 | O   | PHE | A | 20 | -2.503  | -4.820  | 6.537  | 1.00 | 0.00 | O   |
| ATOM | 41 | CB  | PHE | A | 20 | -4.083  | -6.766  | 8.420  | 1.00 | 0.00 | C   |
| ATOM | 42 | CG  | PHE | A | 20 | -5.011  | -7.344  | 9.495  | 1.00 | 0.00 | C   |
| ATOM | 43 | CD1 | PHE | A | 20 | -5.761  | -8.420  | 9.046  | 1.00 | 0.00 | C   |
| ATOM | 44 | CD2 | PHE | A | 20 | -4.970  | -6.993  | 10.841 | 1.00 | 0.00 | C   |
| ATOM | 45 | CE1 | PHE | A | 20 | -6.401  | -9.225  | 9.973  | 1.00 | 0.00 | C   |
| ATOM | 46 | CE2 | PHE | A | 20 | -5.637  | -7.783  | 11.766 | 1.00 | 0.00 | C   |
| ATOM | 47 | CZ  | PHE | A | 20 | -6.392  | -8.868  | 11.318 | 1.00 | 0.00 | C   |
| ATOM | 48 | H   | PHE | A | 20 | -5.186  | -4.730  | 7.156  | 1.00 | 0.00 | H   |
| ATOM | 49 | HD1 | PHE | A | 20 | -5.962  | -8.596  | 7.987  | 1.00 | 0.00 | H   |
| ATOM | 50 | HD2 | PHE | A | 20 | -4.815  | -5.958  | 11.106 | 1.00 | 0.00 | H   |
| ATOM | 51 | HE1 | PHE | A | 20 | -6.827  | -10.190 | 9.703  | 1.00 | 0.00 | H   |
| ATOM | 52 | HE2 | PHE | A | 20 | -5.649  | -7.545  | 12.834 | 1.00 | 0.00 | H   |
| ATOM | 53 | HZ  | PHE | A | 20 | -6.850  | -9.589  | 11.997 | 1.00 | 0.00 | H   |
| ATOM | 54 | N   | ALA | A | 21 | -1.326  | -5.131  | 8.391  | 1.00 | 0.00 | N   |
| ATOM | 55 | CA  | ALA | A | 21 | 0.031   | -4.946  | 7.853  | 1.00 | 0.00 | C   |
| ATOM | 56 | C   | ALA | A | 21 | 1.056   | -5.902  | 8.460  | 1.00 | 0.00 | C   |
| ATOM | 57 | O   | ALA | A | 21 | 1.275   | -5.830  | 9.667  | 1.00 | 0.00 | O   |
| ATOM | 58 | CB  | ALA | A | 21 | 0.480   | -3.489  | 8.020  | 1.00 | 0.00 | C   |
| ATOM | 59 | H   | ALA | A | 21 | -1.316  | -5.490  | 9.318  | 1.00 | 0.00 | H   |
| ATOM | 60 | N   | GLU | A | 22 | 1.769   | -6.584  | 7.570  | 1.00 | 0.00 | N   |
| ATOM | 61 | CA  | GLU | A | 22 | 2.877   | -7.514  | 7.873  | 1.00 | 0.00 | C   |
| ATOM | 62 | C   | GLU | A | 22 | 4.177   | -7.074  | 7.199  | 1.00 | 0.00 | C   |
| ATOM | 63 | O   | GLU | A | 22 | 4.124   | -6.506  | 6.111  | 1.00 | 0.00 | O   |
| ATOM | 64 | CB  | GLU | A | 22 | 2.618   | -8.981  | 7.558  | 1.00 | 0.00 | C   |
| ATOM | 65 | CG  | GLU | A | 22 | 1.579   | -9.660  | 8.465  | 1.00 | 0.00 | C   |
| ATOM | 66 | CD  | GLU | A | 22 | 2.086   | -9.726  | 9.911  | 1.00 | 0.00 | C   |
| ATOM | 67 | OE1 | GLU | A | 22 | 1.231   | -9.564  | 10.801 | 1.00 | 0.00 | O   |
| ATOM | 68 | OE2 | GLU | A | 22 | 3.236   | -10.174 | 10.117 | 1.00 | 0.00 | O1- |
| ATOM | 69 | H   | GLU | A | 22 | 1.736   | -6.309  | 6.616  | 1.00 | 0.00 | H   |
| ATOM | 70 | N   | ASP | A | 23 | 5.254   | -7.146  | 7.983  | 1.00 | 0.00 | N   |
| ATOM | 71 | CA  | ASP | A | 23 | 6.620   | -6.890  | 7.495  | 1.00 | 0.00 | C   |
| ATOM | 72 | C   | ASP | A | 23 | 7.499   | -8.142  | 7.629  | 1.00 | 0.00 | C   |
| ATOM | 73 | O   | ASP | A | 23 | 7.571   | -8.899  | 8.594  | 1.00 | 0.00 | O   |
| ATOM | 74 | CB  | ASP | A | 23 | 7.299   | -5.716  | 8.195  | 1.00 | 0.00 | C   |
| ATOM | 75 | CG  | ASP | A | 23 | 7.714   | -6.032  | 9.632  | 1.00 | 0.00 | C   |
| ATOM | 76 | OD1 | ASP | A | 23 | 6.835   | -6.089  | 10.515 | 1.00 | 0.00 | O   |
| ATOM | 77 | OD2 | ASP | A | 23 | 8.923   | -5.960  | 9.923  | 1.00 | 0.00 | O1- |
| ATOM | 78 | H   | ASP | A | 23 | 5.205   | -7.220  | 8.983  | 1.00 | 0.00 | H   |
| ATOM | 79 | N   | VAL | A | 24 | 8.192   | -8.317  | 6.504  | 1.00 | 0.00 | N   |
| ATOM | 80 | CA  | VAL | A | 24 | 9.177   | -9.378  | 6.289  | 1.00 | 0.00 | C   |
| ATOM | 81 | C   | VAL | A | 24 | 10.508  | -8.761  | 5.848  | 1.00 | 0.00 | C   |
| ATOM | 82 | O   | VAL | A | 24 | 10.701  | -8.324  | 4.719  | 1.00 | 0.00 | O   |
| ATOM | 83 | CB  | VAL | A | 24 | 8.738   | -10.449 | 5.293  | 1.00 | 0.00 | C   |
| ATOM | 84 | CG1 | VAL | A | 24 | 9.863   | -11.447 | 5.018  | 1.00 | 0.00 | C   |
| ATOM | 85 | CG2 | VAL | A | 24 | 7.498   | -11.250 | 5.684  | 1.00 | 0.00 | C   |
| ATOM | 86 | H   | VAL | A | 24 | 8.022   | -7.849  | 5.634  | 1.00 | 0.00 | H   |
| ATOM | 87 | N   | GLY | A | 25 | 11.362  | -8.462  | 6.837  | 1.00 | 0.00 | N   |
| ATOM | 88 | CA  | GLY | A | 25 | 12.672  | -7.840  | 6.600  | 1.00 | 0.00 | C   |
| ATOM | 89 | C   | GLY | A | 25 | 13.695  | -8.513  | 5.684  | 1.00 | 0.00 | C   |
| ATOM | 90 | O   | GLY | A | 25 | 14.635  | -9.177  | 6.144  | 1.00 | 0.00 | O   |
| ATOM | 91 | H   | GLY | A | 25 | 10.995  | -8.382  | 7.754  | 1.00 | 0.00 | H   |



|      |     |      |     |   |    |        |         |        |      |      |     |
|------|-----|------|-----|---|----|--------|---------|--------|------|------|-----|
| ATOM | 92  | N    | SER | A | 26 | 13.309 | -8.660  | 4.429  | 1.00 | 0.00 | N   |
| ATOM | 93  | CA   | SER | A | 26 | 14.187 | -9.127  | 3.340  | 1.00 | 0.00 | C   |
| ATOM | 94  | C    | SER | A | 26 | 15.393 | -8.203  | 3.116  | 1.00 | 0.00 | C   |
| ATOM | 95  | O    | SER | A | 26 | 15.404 | -7.079  | 2.633  | 1.00 | 0.00 | O   |
| ATOM | 96  | CB   | SER | A | 26 | 13.558 | -9.238  | 1.957  | 1.00 | 0.00 | C   |
| ATOM | 97  | OG   | SER | A | 26 | 14.453 | -9.769  | 0.976  | 1.00 | 0.00 | O   |
| ATOM | 98  | H    | SER | A | 26 | 12.357 | -8.577  | 4.129  | 1.00 | 0.00 | H   |
| ATOM | 99  | HG   | SER | A | 26 | 14.098 | -10.447 | 0.327  | 1.00 | 0.00 | H   |
| ATOM | 100 | N    | ASN | A | 27 | 16.510 | -8.650  | 3.696  | 1.00 | 0.00 | N   |
| ATOM | 101 | CA   | ASN | A | 27 | 17.866 | -8.120  | 3.881  | 1.00 | 0.00 | C   |
| ATOM | 102 | C    | ASN | A | 27 | 17.923 | -6.972  | 4.892  | 1.00 | 0.00 | C   |
| ATOM | 103 | O    | ASN | A | 27 | 17.152 | -6.027  | 4.722  | 1.00 | 0.00 | O   |
| ATOM | 104 | CB   | ASN | A | 27 | 18.545 | -7.689  | 2.582  | 1.00 | 0.00 | C   |
| ATOM | 105 | CG   | ASN | A | 27 | 19.105 | -8.814  | 1.707  | 1.00 | 0.00 | C   |
| ATOM | 106 | ND2  | ASN | A | 27 | 20.193 | -8.528  | 0.987  | 1.00 | 0.00 | N   |
| ATOM | 107 | OD1  | ASN | A | 27 | 18.732 | -9.979  | 1.617  | 1.00 | 0.00 | O   |
| ATOM | 108 | H    | ASN | A | 27 | 16.441 | -9.493  | 4.231  | 1.00 | 0.00 | H   |
| ATOM | 109 | 1HD2 | ASN | A | 27 | 20.675 | -7.660  | 1.114  | 1.00 | 0.00 | H   |
| ATOM | 110 | 2HD2 | ASN | A | 27 | 20.498 | -9.236  | 0.357  | 1.00 | 0.00 | H   |
| ATOM | 111 | N    | LYS | A | 28 | 18.762 | -7.040  | 5.921  | 1.00 | 0.00 | N   |
| ATOM | 112 | CA   | LYS | A | 28 | 19.006 | -6.078  | 7.002  | 1.00 | 0.00 | C   |
| ATOM | 113 | C    | LYS | A | 28 | 17.811 | -5.995  | 7.956  | 1.00 | 0.00 | C   |
| ATOM | 114 | O    | LYS | A | 28 | 17.892 | -6.394  | 9.122  | 1.00 | 0.00 | O   |
| ATOM | 115 | CB   | LYS | A | 28 | 19.482 | -4.721  | 6.484  | 1.00 | 0.00 | C   |
| ATOM | 116 | CG   | LYS | A | 28 | 20.251 | -4.023  | 7.598  | 1.00 | 0.00 | C   |
| ATOM | 117 | CD   | LYS | A | 28 | 20.117 | -2.501  | 7.651  | 1.00 | 0.00 | C   |
| ATOM | 118 | CE   | LYS | A | 28 | 18.758 | -2.041  | 8.181  | 1.00 | 0.00 | C   |
| ATOM | 119 | NZ   | LYS | A | 28 | 18.735 | -0.583  | 8.046  | 1.00 | 0.00 | N1+ |
| ATOM | 120 | H    | LYS | A | 28 | 19.281 | -7.881  | 6.082  | 1.00 | 0.00 | H   |
| ATOM | 121 | HZ1  | LYS | A | 28 | 19.024 | -0.224  | 7.158  | 1.00 | 0.00 | H   |
| ATOM | 122 | HZ2  | LYS | A | 28 | 17.766 | -0.401  | 8.220  | 1.00 | 0.00 | H   |
| ATOM | 123 | HZ3  | LYS | A | 28 | 19.289 | -0.307  | 8.839  | 1.00 | 0.00 | H   |
| ATOM | 124 | N    | GLY | A | 29 | 16.651 | -5.770  | 7.354  | 1.00 | 0.00 | N   |
| ATOM | 125 | CA   | GLY | A | 29 | 15.340 | -5.595  | 8.011  | 1.00 | 0.00 | C   |
| ATOM | 126 | C    | GLY | A | 29 | 15.192 | -4.198  | 8.596  | 1.00 | 0.00 | C   |
| ATOM | 127 | O    | GLY | A | 29 | 16.108 | -3.373  | 8.568  | 1.00 | 0.00 | O   |
| ATOM | 128 | H    | GLY | A | 29 | 16.684 | -5.650  | 6.369  | 1.00 | 0.00 | H   |
| ATOM | 129 | N    | ALA | A | 30 | 14.004 | -3.945  | 9.147  | 1.00 | 0.00 | N   |
| ATOM | 130 | CA   | ALA | A | 30 | 13.657 | -2.585  | 9.580  | 1.00 | 0.00 | C   |
| ATOM | 131 | C    | ALA | A | 30 | 12.926 | -2.601  | 10.921 | 1.00 | 0.00 | C   |
| ATOM | 132 | O    | ALA | A | 30 | 12.404 | -3.615  | 11.406 | 1.00 | 0.00 | O   |
| ATOM | 133 | CB   | ALA | A | 30 | 12.839 | -1.905  | 8.483  | 1.00 | 0.00 | C   |
| ATOM | 134 | H    | ALA | A | 30 | 13.243 | -4.586  | 9.290  | 1.00 | 0.00 | H   |
| ATOM | 135 | N    | ILE | A | 31 | 12.916 | -1.472  | 11.619 | 1.00 | 0.00 | N   |
| ATOM | 136 | CA   | ILE | A | 31 | 12.419 | -1.372  | 12.989 | 1.00 | 0.00 | C   |
| ATOM | 137 | C    | ILE | A | 31 | 10.943 | -0.976  | 12.927 | 1.00 | 0.00 | C   |
| ATOM | 138 | O    | ILE | A | 31 | 10.542 | -0.088  | 12.173 | 1.00 | 0.00 | O   |
| ATOM | 139 | CB   | ILE | A | 31 | 13.264 | -0.230  | 13.548 | 1.00 | 0.00 | C   |
| ATOM | 140 | CG1  | ILE | A | 31 | 14.760 | -0.111  | 13.249 | 1.00 | 0.00 | C   |
| ATOM | 141 | CG2  | ILE | A | 31 | 13.017 | -0.225  | 15.064 | 1.00 | 0.00 | C   |
| ATOM | 142 | CD   | ILE | A | 31 | 15.139 | 1.331   | 13.613 | 1.00 | 0.00 | C   |
| ATOM | 143 | H    | ILE | A | 31 | 13.131 | -0.557  | 11.272 | 1.00 | 0.00 | H   |
| ATOM | 144 | N    | ILE | A | 32 | 10.333 | -1.107  | 14.097 | 1.00 | 0.00 | N   |
| ATOM | 145 | CA   | ILE | A | 32 | 8.860  | -1.142  | 14.182 | 1.00 | 0.00 | C   |
| ATOM | 146 | C    | ILE | A | 32 | 8.338  | 0.268   | 14.448 | 1.00 | 0.00 | C   |
| ATOM | 147 | O    | ILE | A | 32 | 8.381  | 0.749   | 15.578 | 1.00 | 0.00 | O   |
| ATOM | 148 | CB   | ILE | A | 32 | 8.309  | -2.118  | 15.227 | 1.00 | 0.00 | C   |
| ATOM | 149 | CG1  | ILE | A | 32 | 8.761  | -3.537  | 14.866 | 1.00 | 0.00 | C   |
| ATOM | 150 | CG2  | ILE | A | 32 | 6.797  | -2.110  | 14.971 | 1.00 | 0.00 | C   |
| ATOM | 151 | CD   | ILE | A | 32 | 8.785  | -4.386  | 16.134 | 1.00 | 0.00 | C   |
| ATOM | 152 | H    | ILE | A | 32 | 10.797 | -1.582  | 14.840 | 1.00 | 0.00 | H   |
| ATOM | 153 | N    | GLY | A | 33 | 7.787  | 0.915   | 13.430 | 1.00 | 0.00 | N   |
| ATOM | 154 | CA   | GLY | A | 33 | 7.057  | 2.180   | 13.566 | 1.00 | 0.00 | C   |
| ATOM | 155 | C    | GLY | A | 33 | 5.549  | 2.036   | 13.306 | 1.00 | 0.00 | C   |
| ATOM | 156 | O    | GLY | A | 33 | 5.219  | 1.527   | 12.237 | 1.00 | 0.00 | O   |
| ATOM | 157 | H    | GLY | A | 33 | 7.932  | 0.665   | 12.470 | 1.00 | 0.00 | H   |
| ATOM | 158 | N    | LEU | A | 34 | 4.673  | 2.454   | 14.217 | 1.00 | 0.00 | N   |
| ATOM | 159 | CA   | LEU | A | 34 | 3.235  | 2.189   | 14.112 | 1.00 | 0.00 | C   |

|      |     |     |     |   |    |         |        |        |      |      |   |
|------|-----|-----|-----|---|----|---------|--------|--------|------|------|---|
| ATOM | 160 | C   | LEU | A | 34 | 2.507   | 3.539  | 14.124 | 1.00 | 0.00 | C |
| ATOM | 161 | O   | LEU | A | 34 | 2.606   | 4.268  | 15.107 | 1.00 | 0.00 | O |
| ATOM | 162 | CB  | LEU | A | 34 | 2.824   | 1.303  | 15.285 | 1.00 | 0.00 | C |
| ATOM | 163 | CG  | LEU | A | 34 | 1.353   | 0.892  | 15.322 | 1.00 | 0.00 | C |
| ATOM | 164 | CD1 | LEU | A | 34 | 0.877   | -0.079 | 14.245 | 1.00 | 0.00 | C |
| ATOM | 165 | CD2 | LEU | A | 34 | 0.941   | 0.418  | 16.721 | 1.00 | 0.00 | C |
| ATOM | 166 | H   | LEU | A | 34 | 4.970   | 2.956  | 15.025 | 1.00 | 0.00 | H |
| ATOM | 167 | N   | MET | A | 35 | 1.835   | 3.969  | 13.054 | 1.00 | 0.00 | N |
| ATOM | 168 | CA  | MET | A | 35 | 1.106   | 5.239  | 12.981 | 1.00 | 0.00 | C |
| ATOM | 169 | C   | MET | A | 35 | -0.381  | 5.012  | 12.714 | 1.00 | 0.00 | C |
| ATOM | 170 | O   | MET | A | 35 | -0.805  | 4.061  | 12.059 | 1.00 | 0.00 | O |
| ATOM | 171 | CB  | MET | A | 35 | 1.661   | 6.134  | 11.872 | 1.00 | 0.00 | C |
| ATOM | 172 | CG  | MET | A | 35 | 3.158   | 6.441  | 11.846 | 1.00 | 0.00 | C |
| ATOM | 173 | SD  | MET | A | 35 | 4.115   | 5.180  | 10.919 | 1.00 | 0.00 | S |
| ATOM | 174 | CE  | MET | A | 35 | 5.788   | 5.759  | 11.066 | 1.00 | 0.00 | C |
| ATOM | 175 | H   | MET | A | 35 | 1.742   | 3.325  | 12.290 | 1.00 | 0.00 | H |
| ATOM | 176 | N   | VAL | A | 36 | -1.197  | 5.884  | 13.315 | 1.00 | 0.00 | N |
| ATOM | 177 | CA  | VAL | A | 36 | -2.610  | 5.837  | 12.894 | 1.00 | 0.00 | C |
| ATOM | 178 | C   | VAL | A | 36 | -2.802  | 6.637  | 11.600 | 1.00 | 0.00 | C |
| ATOM | 179 | O   | VAL | A | 36 | -1.960  | 7.408  | 11.145 | 1.00 | 0.00 | O |
| ATOM | 180 | CB  | VAL | A | 36 | -3.479  | 6.430  | 14.004 | 1.00 | 0.00 | C |
| ATOM | 181 | CG1 | VAL | A | 36 | -3.374  | 5.733  | 15.366 | 1.00 | 0.00 | C |
| ATOM | 182 | CG2 | VAL | A | 36 | -3.014  | 7.858  | 14.281 | 1.00 | 0.00 | C |
| ATOM | 183 | H   | VAL | A | 36 | -0.823  | 6.704  | 13.742 | 1.00 | 0.00 | H |
| ATOM | 184 | N   | GLY | A | 37 | -3.711  | 6.064  | 10.820 | 1.00 | 0.00 | N |
| ATOM | 185 | CA  | GLY | A | 37 | -4.200  | 6.827  | 9.651  | 1.00 | 0.00 | C |
| ATOM | 186 | C   | GLY | A | 37 | -5.511  | 7.531  | 9.974  | 1.00 | 0.00 | C |
| ATOM | 187 | O   | GLY | A | 37 | -5.557  | 8.272  | 10.966 | 1.00 | 0.00 | O |
| ATOM | 188 | H   | GLY | A | 37 | -4.008  | 5.113  | 10.919 | 1.00 | 0.00 | H |
| ATOM | 189 | N   | GLY | A | 38 | -6.585  | 7.263  | 9.235  | 1.00 | 0.00 | N |
| ATOM | 190 | CA  | GLY | A | 38 | -7.990  | 7.192  | 9.664  | 1.00 | 0.00 | C |
| ATOM | 191 | C   | GLY | A | 38 | -8.773  | 8.488  | 9.888  | 1.00 | 0.00 | C |
| ATOM | 192 | O   | GLY | A | 38 | -9.975  | 8.585  | 10.096 | 1.00 | 0.00 | O |
| ATOM | 193 | H   | GLY | A | 38 | -6.477  | 7.033  | 8.275  | 1.00 | 0.00 | H |
| ATOM | 194 | N   | VAL | A | 39 | -8.010  | 9.577  | 9.742  | 1.00 | 0.00 | N |
| ATOM | 195 | CA  | VAL | A | 39 | -8.403  | 10.984 | 9.597  | 1.00 | 0.00 | C |
| ATOM | 196 | C   | VAL | A | 39 | -9.343  | 11.380 | 8.457  | 1.00 | 0.00 | C |
| ATOM | 197 | O   | VAL | A | 39 | -9.212  | 10.777 | 7.390  | 1.00 | 0.00 | O |
| ATOM | 198 | CB  | VAL | A | 39 | -7.177  | 11.902 | 9.575  | 1.00 | 0.00 | C |
| ATOM | 199 | CG1 | VAL | A | 39 | -6.721  | 12.229 | 10.990 | 1.00 | 0.00 | C |
| ATOM | 200 | CG2 | VAL | A | 39 | -5.888  | 11.406 | 8.920  | 1.00 | 0.00 | C |
| ATOM | 201 | H   | VAL | A | 39 | -7.059  | 9.548  | 10.012 | 1.00 | 0.00 | H |
| ATOM | 202 | N   | VAL | A | 40 | -10.082 | 12.476 | 8.665  | 1.00 | 0.00 | N |
| ATOM | 203 | CA  | VAL | A | 40 | -10.854 | 13.009 | 7.531  | 1.00 | 0.00 | C |
| ATOM | 204 | C   | VAL | A | 40 | -10.006 | 13.964 | 6.682  | 1.00 | 0.00 | C |
| ATOM | 205 | O   | VAL | A | 40 | -9.746  | 15.082 | 7.137  | 1.00 | 0.00 | O |
| ATOM | 206 | CB  | VAL | A | 40 | -12.155 | 13.623 | 8.068  | 1.00 | 0.00 | C |
| ATOM | 207 | CG1 | VAL | A | 40 | -12.969 | 14.276 | 6.959  | 1.00 | 0.00 | C |
| ATOM | 208 | CG2 | VAL | A | 40 | -13.021 | 12.562 | 8.743  | 1.00 | 0.00 | C |
| ATOM | 209 | H   | VAL | A | 40 | -10.336 | 12.813 | 9.564  | 1.00 | 0.00 | H |
| ATOM | 210 | N   | ILE | A | 41 | -9.884  | 13.657 | 5.395  | 1.00 | 0.00 | N |
| ATOM | 211 | CA  | ILE | A | 41 | -9.022  | 14.422 | 4.487  | 1.00 | 0.00 | C |
| ATOM | 212 | C   | ILE | A | 41 | -9.681  | 15.751 | 4.125  | 1.00 | 0.00 | C |
| ATOM | 213 | O   | ILE | A | 41 | -10.906 | 15.850 | 4.090  | 1.00 | 0.00 | O |
| ATOM | 214 | CB  | ILE | A | 41 | -8.505  | 13.662 | 3.256  | 1.00 | 0.00 | C |
| ATOM | 215 | CG1 | ILE | A | 41 | -9.450  | 12.732 | 2.500  | 1.00 | 0.00 | C |
| ATOM | 216 | CG2 | ILE | A | 41 | -7.216  | 12.991 | 3.730  | 1.00 | 0.00 | C |
| ATOM | 217 | CD  | ILE | A | 41 | -10.269 | 13.605 | 1.542  | 1.00 | 0.00 | C |
| ATOM | 218 | H   | ILE | A | 41 | -10.530 | 13.032 | 4.954  | 1.00 | 0.00 | H |
| ATOM | 219 | N   | ALA | A | 42 | -8.840  | 16.705 | 3.746  | 1.00 | 0.00 | N |
| ATOM | 220 | CA  | ALA | A | 42 | -9.276  | 18.084 | 3.467  | 1.00 | 0.00 | C |
| ATOM | 221 | C   | ALA | A | 42 | -10.180 | 18.406 | 2.274  | 1.00 | 0.00 | C |
| ATOM | 222 | CB  | ALA | A | 42 | -8.095  | 19.041 | 3.543  | 1.00 | 0.00 | C |
| ATOM | 223 | O1  | ALA | A | 42 | -9.966  | 17.964 | 1.124  | 1.00 | 0.00 | O |
| ATOM | 224 | O2  | ALA | A | 42 | -10.953 | 19.361 | 2.489  | 1.00 | 0.00 | O |
| ATOM | 225 | H   | ALA | A | 42 | -7.877  | 16.533 | 3.531  | 1.00 | 0.00 | H |
| ATOM | 226 | N   | LEU | B | 17 | -13.983 | -8.400 | 7.963  | 1.00 | 0.00 | N |
| ATOM | 227 | CA  | LEU | B | 17 | -13.620 | -8.107 | 6.565  | 1.00 | 0.00 | C |

|      |     |     |     |   |    |         |         |       |      |      |     |
|------|-----|-----|-----|---|----|---------|---------|-------|------|------|-----|
| ATOM | 228 | C   | LEU | B | 17 | -12.277 | -7.388  | 6.487 | 1.00 | 0.00 | C   |
| ATOM | 229 | O   | LEU | B | 17 | -12.157 | -6.495  | 7.331 | 1.00 | 0.00 | O   |
| ATOM | 230 | CB  | LEU | B | 17 | -14.717 | -7.295  | 5.882 | 1.00 | 0.00 | C   |
| ATOM | 231 | CG  | LEU | B | 17 | -14.784 | -7.505  | 4.369 | 1.00 | 0.00 | C   |
| ATOM | 232 | CD1 | LEU | B | 17 | -14.985 | -8.972  | 3.965 | 1.00 | 0.00 | C   |
| ATOM | 233 | CD2 | LEU | B | 17 | -15.939 | -6.707  | 3.765 | 1.00 | 0.00 | C   |
| ATOM | 234 | H1  | LEU | B | 17 | -13.179 | -8.810  | 8.383 | 1.00 | 0.00 | H   |
| ATOM | 235 | H2  | LEU | B | 17 | -14.199 | -7.581  | 8.507 | 1.00 | 0.00 | H   |
| ATOM | 236 | H3  | LEU | B | 17 | -14.740 | -9.059  | 7.991 | 1.00 | 0.00 | H   |
| ATOM | 237 | N   | VAL | B | 18 | -11.300 | -8.158  | 6.019 | 1.00 | 0.00 | N   |
| ATOM | 238 | CA  | VAL | B | 18 | -9.900  | -7.729  | 5.909 | 1.00 | 0.00 | C   |
| ATOM | 239 | C   | VAL | B | 18 | -9.630  | -6.682  | 4.831 | 1.00 | 0.00 | C   |
| ATOM | 240 | O   | VAL | B | 18 | -10.466 | -6.467  | 3.960 | 1.00 | 0.00 | O   |
| ATOM | 241 | CB  | VAL | B | 18 | -8.920  | -8.906  | 5.829 | 1.00 | 0.00 | C   |
| ATOM | 242 | CG1 | VAL | B | 18 | -8.984  | -9.727  | 7.112 | 1.00 | 0.00 | C   |
| ATOM | 243 | CG2 | VAL | B | 18 | -8.908  | -9.686  | 4.512 | 1.00 | 0.00 | C   |
| ATOM | 244 | H   | VAL | B | 18 | -11.410 | -9.029  | 5.536 | 1.00 | 0.00 | H   |
| ATOM | 245 | N   | PHE | B | 19 | -8.458  | -6.075  | 5.007 | 1.00 | 0.00 | N   |
| ATOM | 246 | CA  | PHE | B | 19 | -7.902  | -5.139  | 4.023 | 1.00 | 0.00 | C   |
| ATOM | 247 | C   | PHE | B | 19 | -6.404  | -5.146  | 4.314 | 1.00 | 0.00 | C   |
| ATOM | 248 | O   | PHE | B | 19 | -5.950  | -4.483  | 5.246 | 1.00 | 0.00 | O   |
| ATOM | 249 | CB  | PHE | B | 19 | -8.465  | -3.722  | 4.176 | 1.00 | 0.00 | C   |
| ATOM | 250 | CG  | PHE | B | 19 | -8.105  | -2.703  | 3.092 | 1.00 | 0.00 | C   |
| ATOM | 251 | CD1 | PHE | B | 19 | -6.828  | -2.173  | 3.133 | 1.00 | 0.00 | C   |
| ATOM | 252 | CD2 | PHE | B | 19 | -9.093  | -2.206  | 2.238 | 1.00 | 0.00 | C   |
| ATOM | 253 | CE1 | PHE | B | 19 | -6.498  | -1.265  | 2.129 | 1.00 | 0.00 | C   |
| ATOM | 254 | CE2 | PHE | B | 19 | -8.759  | -1.217  | 1.328 | 1.00 | 0.00 | C   |
| ATOM | 255 | CZ  | PHE | B | 19 | -7.429  | -0.820  | 1.206 | 1.00 | 0.00 | C   |
| ATOM | 256 | H   | PHE | B | 19 | -8.181  | -5.899  | 5.960 | 1.00 | 0.00 | H   |
| ATOM | 257 | HD1 | PHE | B | 19 | -6.030  | -2.650  | 3.709 | 1.00 | 0.00 | H   |
| ATOM | 258 | HD2 | PHE | B | 19 | -10.091 | -2.547  | 2.516 | 1.00 | 0.00 | H   |
| ATOM | 259 | HE1 | PHE | B | 19 | -5.468  | -1.047  | 1.840 | 1.00 | 0.00 | H   |
| ATOM | 260 | HE2 | PHE | B | 19 | -9.525  | -0.702  | 0.743 | 1.00 | 0.00 | H   |
| ATOM | 261 | HZ  | PHE | B | 19 | -7.126  | -0.385  | 0.254 | 1.00 | 0.00 | H   |
| ATOM | 262 | N   | PHE | B | 20 | -5.662  | -5.830  | 3.446 | 1.00 | 0.00 | N   |
| ATOM | 263 | CA  | PHE | B | 20 | -4.312  | -6.321  | 3.803 | 1.00 | 0.00 | C   |
| ATOM | 264 | C   | PHE | B | 20 | -3.126  | -5.673  | 3.092 | 1.00 | 0.00 | C   |
| ATOM | 265 | O   | PHE | B | 20 | -3.129  | -5.462  | 1.880 | 1.00 | 0.00 | O   |
| ATOM | 266 | CB  | PHE | B | 20 | -4.161  | -7.808  | 3.495 | 1.00 | 0.00 | C   |
| ATOM | 267 | CG  | PHE | B | 20 | -3.336  | -8.556  | 4.548 | 1.00 | 0.00 | C   |
| ATOM | 268 | CD1 | PHE | B | 20 | -3.989  | -9.123  | 5.639 | 1.00 | 0.00 | C   |
| ATOM | 269 | CD2 | PHE | B | 20 | -1.956  | -8.618  | 4.383 | 1.00 | 0.00 | C   |
| ATOM | 270 | CE1 | PHE | B | 20 | -3.163  | -9.624  | 6.643 | 1.00 | 0.00 | C   |
| ATOM | 271 | CE2 | PHE | B | 20 | -1.147  | -9.110  | 5.392 | 1.00 | 0.00 | C   |
| ATOM | 272 | CZ  | PHE | B | 20 | -1.774  | -9.544  | 6.551 | 1.00 | 0.00 | C   |
| ATOM | 273 | H   | PHE | B | 20 | -5.945  | -6.046  | 2.515 | 1.00 | 0.00 | H   |
| ATOM | 274 | HD1 | PHE | B | 20 | -5.038  | -9.388  | 5.673 | 1.00 | 0.00 | H   |
| ATOM | 275 | HD2 | PHE | B | 20 | -1.509  | -8.568  | 3.394 | 1.00 | 0.00 | H   |
| ATOM | 276 | HE1 | PHE | B | 20 | -3.556  | -10.085 | 7.548 | 1.00 | 0.00 | H   |
| ATOM | 277 | HE2 | PHE | B | 20 | -0.064  | -9.056  | 5.293 | 1.00 | 0.00 | H   |
| ATOM | 278 | HZ  | PHE | B | 20 | -1.147  | -10.002 | 7.322 | 1.00 | 0.00 | H   |
| ATOM | 279 | N   | ALA | B | 21 | -1.967  | -5.535  | 3.732 | 1.00 | 0.00 | N   |
| ATOM | 280 | CA  | ALA | B | 21 | -0.732  | -5.168  | 3.023 | 1.00 | 0.00 | C   |
| ATOM | 281 | C   | ALA | B | 21 | 0.443   | -5.945  | 3.611 | 1.00 | 0.00 | C   |
| ATOM | 282 | O   | ALA | B | 21 | 0.593   | -5.892  | 4.827 | 1.00 | 0.00 | O   |
| ATOM | 283 | CB  | ALA | B | 21 | -0.429  | -3.681  | 3.242 | 1.00 | 0.00 | C   |
| ATOM | 284 | H   | ALA | B | 21 | -2.008  | -5.363  | 4.713 | 1.00 | 0.00 | H   |
| ATOM | 285 | N   | GLU | B | 22 | 1.354   | -6.410  | 2.751 | 1.00 | 0.00 | N   |
| ATOM | 286 | CA  | GLU | B | 22 | 2.534   | -7.147  | 3.235 | 1.00 | 0.00 | C   |
| ATOM | 287 | C   | GLU | B | 22 | 3.779   | -6.588  | 2.537 | 1.00 | 0.00 | C   |
| ATOM | 288 | O   | GLU | B | 22 | 3.689   | -6.170  | 1.384 | 1.00 | 0.00 | O   |
| ATOM | 289 | CB  | GLU | B | 22 | 2.409   | -8.627  | 2.871 | 1.00 | 0.00 | C   |
| ATOM | 290 | CG  | GLU | B | 22 | 3.311   | -9.459  | 3.786 | 1.00 | 0.00 | C   |
| ATOM | 291 | CD  | GLU | B | 22 | 3.118   | -10.980 | 3.763 | 1.00 | 0.00 | C   |
| ATOM | 292 | OE1 | GLU | B | 22 | 3.796   | -11.705 | 3.007 | 1.00 | 0.00 | O   |
| ATOM | 293 | OE2 | GLU | B | 22 | 2.122   | -11.451 | 4.350 | 1.00 | 0.00 | O1- |
| ATOM | 294 | H   | GLU | B | 22 | 1.403   | -6.323  | 1.762 | 1.00 | 0.00 | H   |
| ATOM | 295 | N   | ASP | B | 23 | 4.809   | -6.456  | 3.359 | 1.00 | 0.00 | N   |

|      |     |      |     |   |    |        |         |        |      |      |     |
|------|-----|------|-----|---|----|--------|---------|--------|------|------|-----|
| ATOM | 296 | CA   | ASP | B | 23 | 6.062  | -5.942  | 2.783  | 1.00 | 0.00 | C   |
| ATOM | 297 | C    | ASP | B | 23 | 7.129  | -7.030  | 2.939  | 1.00 | 0.00 | C   |
| ATOM | 298 | O    | ASP | B | 23 | 7.753  | -7.170  | 3.996  | 1.00 | 0.00 | O   |
| ATOM | 299 | CB   | ASP | B | 23 | 6.556  | -4.649  | 3.433  | 1.00 | 0.00 | C   |
| ATOM | 300 | CG   | ASP | B | 23 | 7.788  | -3.951  | 2.856  | 1.00 | 0.00 | C   |
| ATOM | 301 | OD1  | ASP | B | 23 | 8.388  | -4.595  | 1.957  | 1.00 | 0.00 | O   |
| ATOM | 302 | OD2  | ASP | B | 23 | 8.183  | -2.850  | 3.313  | 1.00 | 0.00 | O1- |
| ATOM | 303 | H    | ASP | B | 23 | 4.812  | -6.653  | 4.342  | 1.00 | 0.00 | H   |
| ATOM | 304 | N    | VAL | B | 24 | 7.349  | -7.531  | 1.724  | 1.00 | 0.00 | N   |
| ATOM | 305 | CA   | VAL | B | 24 | 8.386  | -8.519  | 1.413  | 1.00 | 0.00 | C   |
| ATOM | 306 | C    | VAL | B | 24 | 9.401  | -7.955  | 0.416  | 1.00 | 0.00 | C   |
| ATOM | 307 | O    | VAL | B | 24 | 10.137 | -8.697  | -0.232 | 1.00 | 0.00 | O   |
| ATOM | 308 | CB   | VAL | B | 24 | 7.704  | -9.800  | 0.919  | 1.00 | 0.00 | C   |
| ATOM | 309 | CG1  | VAL | B | 24 | 6.731  | -10.357 | 1.966  | 1.00 | 0.00 | C   |
| ATOM | 310 | CG2  | VAL | B | 24 | 6.889  | -9.573  | -0.353 | 1.00 | 0.00 | C   |
| ATOM | 311 | H    | VAL | B | 24 | 6.792  | -7.238  | 0.952  | 1.00 | 0.00 | H   |
| ATOM | 312 | N    | GLY | B | 25 | 9.572  | -6.648  | 0.306  | 1.00 | 0.00 | N   |
| ATOM | 313 | CA   | GLY | B | 25 | 10.587 | -5.941  | -0.490 | 1.00 | 0.00 | C   |
| ATOM | 314 | C    | GLY | B | 25 | 12.040 | -6.093  | -0.022 | 1.00 | 0.00 | C   |
| ATOM | 315 | O    | GLY | B | 25 | 12.256 | -6.111  | 1.195  | 1.00 | 0.00 | O   |
| ATOM | 316 | H    | GLY | B | 25 | 9.030  | -6.016  | 0.856  | 1.00 | 0.00 | H   |
| ATOM | 317 | N    | SER | B | 26 | 12.910 | -5.593  | -0.895 | 1.00 | 0.00 | N   |
| ATOM | 318 | CA   | SER | B | 26 | 14.371 | -5.754  | -0.867 | 1.00 | 0.00 | C   |
| ATOM | 319 | C    | SER | B | 26 | 15.115 | -4.607  | -0.175 | 1.00 | 0.00 | C   |
| ATOM | 320 | O    | SER | B | 26 | 14.825 | -3.425  | -0.374 | 1.00 | 0.00 | O   |
| ATOM | 321 | CB   | SER | B | 26 | 14.902 | -5.960  | -2.279 | 1.00 | 0.00 | C   |
| ATOM | 322 | OG   | SER | B | 26 | 14.131 | -6.895  | -3.043 | 1.00 | 0.00 | O   |
| ATOM | 323 | H    | SER | B | 26 | 12.598 | -4.889  | -1.543 | 1.00 | 0.00 | H   |
| ATOM | 324 | HG   | SER | B | 26 | 14.553 | -6.911  | -3.943 | 1.00 | 0.00 | H   |
| ATOM | 325 | N    | ASN | B | 27 | 16.224 | -4.909  | 0.492  | 1.00 | 0.00 | N   |
| ATOM | 326 | CA   | ASN | B | 27 | 17.314 | -4.041  | 0.967  | 1.00 | 0.00 | C   |
| ATOM | 327 | C    | ASN | B | 27 | 16.837 | -2.880  | 1.850  | 1.00 | 0.00 | C   |
| ATOM | 328 | O    | ASN | B | 27 | 16.716 | -1.731  | 1.436  | 1.00 | 0.00 | O   |
| ATOM | 329 | CB   | ASN | B | 27 | 18.175 | -3.504  | -0.174 | 1.00 | 0.00 | C   |
| ATOM | 330 | CG   | ASN | B | 27 | 19.068 | -4.497  | -0.923 | 1.00 | 0.00 | C   |
| ATOM | 331 | ND2  | ASN | B | 27 | 20.376 | -4.367  | -0.741 | 1.00 | 0.00 | N   |
| ATOM | 332 | OD1  | ASN | B | 27 | 18.587 | -5.477  | -1.510 | 1.00 | 0.00 | O   |
| ATOM | 333 | H    | ASN | B | 27 | 16.235 | -5.779  | 0.984  | 1.00 | 0.00 | H   |
| ATOM | 334 | 1HD2 | ASN | B | 27 | 20.741 | -3.645  | -0.147 | 1.00 | 0.00 | H   |
| ATOM | 335 | 2HD2 | ASN | B | 27 | 20.910 | -5.120  | -1.114 | 1.00 | 0.00 | H   |
| ATOM | 336 | N    | LYS | B | 28 | 16.313 | -3.231  | 3.022  | 1.00 | 0.00 | N   |
| ATOM | 337 | CA   | LYS | B | 28 | 15.583 | -2.301  | 3.880  | 1.00 | 0.00 | C   |
| ATOM | 338 | C    | LYS | B | 28 | 16.504 | -1.415  | 4.725  | 1.00 | 0.00 | C   |
| ATOM | 339 | O    | LYS | B | 28 | 17.505 | -1.832  | 5.296  | 1.00 | 0.00 | O   |
| ATOM | 340 | CB   | LYS | B | 28 | 14.713 | -3.192  | 4.768  | 1.00 | 0.00 | C   |
| ATOM | 341 | CG   | LYS | B | 28 | 13.668 | -3.950  | 3.939  | 1.00 | 0.00 | C   |
| ATOM | 342 | CD   | LYS | B | 28 | 12.283 | -4.026  | 4.571  | 1.00 | 0.00 | C   |
| ATOM | 343 | CE   | LYS | B | 28 | 11.408 | -5.162  | 4.021  | 1.00 | 0.00 | C   |
| ATOM | 344 | NZ   | LYS | B | 28 | 10.062 | -5.092  | 4.612  | 1.00 | 0.00 | N1+ |
| ATOM | 345 | H    | LYS | B | 28 | 16.414 | -4.093  | 3.520  | 1.00 | 0.00 | H   |
| ATOM | 346 | HZ1  | LYS | B | 28 | 10.243 | -5.032  | 5.592  | 1.00 | 0.00 | H   |
| ATOM | 347 | HZ2  | LYS | B | 28 | 9.598  | -4.268  | 4.301  | 1.00 | 0.00 | H   |
| ATOM | 348 | HZ3  | LYS | B | 28 | 9.583  | -5.942  | 4.381  | 1.00 | 0.00 | H   |
| ATOM | 349 | N    | GLY | B | 29 | 15.959 | -0.200  | 4.818  | 1.00 | 0.00 | N   |
| ATOM | 350 | CA   | GLY | B | 29 | 16.327 | 0.938   | 5.678  | 1.00 | 0.00 | C   |
| ATOM | 351 | C    | GLY | B | 29 | 16.035 | 1.058   | 7.178  | 1.00 | 0.00 | C   |
| ATOM | 352 | O    | GLY | B | 29 | 16.010 | 0.082   | 7.927  | 1.00 | 0.00 | O   |
| ATOM | 353 | H    | GLY | B | 29 | 15.433 | 0.108   | 4.037  | 1.00 | 0.00 | H   |
| ATOM | 354 | N    | ALA | B | 30 | 15.755 | 2.261   | 7.663  | 1.00 | 0.00 | N   |
| ATOM | 355 | CA   | ALA | B | 30 | 15.450 | 2.704   | 9.036  | 1.00 | 0.00 | C   |
| ATOM | 356 | C    | ALA | B | 30 | 14.107 | 2.159   | 9.533  | 1.00 | 0.00 | C   |
| ATOM | 357 | O    | ALA | B | 30 | 14.115 | 1.070   | 10.095 | 1.00 | 0.00 | O   |
| ATOM | 358 | CB   | ALA | B | 30 | 15.577 | 4.228   | 9.150  | 1.00 | 0.00 | C   |
| ATOM | 359 | H    | ALA | B | 30 | 15.754 | 3.050   | 7.042  | 1.00 | 0.00 | H   |
| ATOM | 360 | N    | ILE | B | 31 | 13.007 | 2.829   | 9.213  | 1.00 | 0.00 | N   |
| ATOM | 361 | CA   | ILE | B | 31 | 11.787 | 2.331   | 9.873  | 1.00 | 0.00 | C   |
| ATOM | 362 | C    | ILE | B | 31 | 10.670 | 1.747   | 9.017  | 1.00 | 0.00 | C   |
| ATOM | 363 | O    | ILE | B | 31 | 10.242 | 2.404   | 8.068  | 1.00 | 0.00 | O   |

|      |     |     |     |   |    |         |        |        |      |      |   |
|------|-----|-----|-----|---|----|---------|--------|--------|------|------|---|
| ATOM | 364 | CB  | ILE | B | 31 | 11.267  | 3.458  | 10.758 | 1.00 | 0.00 | C |
| ATOM | 365 | CG1 | ILE | B | 31 | 11.046  | 4.829  | 10.127 | 1.00 | 0.00 | C |
| ATOM | 366 | CG2 | ILE | B | 31 | 12.022  | 3.651  | 12.075 | 1.00 | 0.00 | C |
| ATOM | 367 | CD  | ILE | B | 31 | 10.133  | 5.729  | 10.953 | 1.00 | 0.00 | C |
| ATOM | 368 | H   | ILE | B | 31 | 12.940  | 3.608  | 8.590  | 1.00 | 0.00 | H |
| ATOM | 369 | N   | ILE | B | 32 | 10.092  | 0.598  | 9.380  | 1.00 | 0.00 | N |
| ATOM | 370 | CA  | ILE | B | 32 | 8.920   | 0.057  | 8.695  | 1.00 | 0.00 | C |
| ATOM | 371 | C   | ILE | B | 32 | 7.694   | 0.711  | 9.326  | 1.00 | 0.00 | C |
| ATOM | 372 | O   | ILE | B | 32 | 7.475   | 0.540  | 10.518 | 1.00 | 0.00 | O |
| ATOM | 373 | CB  | ILE | B | 32 | 8.915   | -1.474 | 8.764  | 1.00 | 0.00 | C |
| ATOM | 374 | CG1 | ILE | B | 32 | 7.670   | -2.087 | 8.099  | 1.00 | 0.00 | C |
| ATOM | 375 | CG2 | ILE | B | 32 | 9.242   | -2.162 | 10.084 | 1.00 | 0.00 | C |
| ATOM | 376 | CD  | ILE | B | 32 | 7.654   | -2.085 | 6.575  | 1.00 | 0.00 | C |
| ATOM | 377 | H   | ILE | B | 32 | 10.541  | 0.146  | 10.149 | 1.00 | 0.00 | H |
| ATOM | 378 | N   | GLY | B | 33 | 7.312   | 1.809  | 8.662  | 1.00 | 0.00 | N |
| ATOM | 379 | CA  | GLY | B | 33 | 6.174   | 2.592  | 9.166  | 1.00 | 0.00 | C |
| ATOM | 380 | C   | GLY | B | 33 | 4.823   | 1.977  | 8.801  | 1.00 | 0.00 | C |
| ATOM | 381 | O   | GLY | B | 33 | 4.312   | 2.415  | 7.769  | 1.00 | 0.00 | O |
| ATOM | 382 | H   | GLY | B | 33 | 7.695   | 2.132  | 7.800  | 1.00 | 0.00 | H |
| ATOM | 383 | N   | LEU | B | 34 | 4.188   | 1.324  | 9.761  | 1.00 | 0.00 | N |
| ATOM | 384 | CA  | LEU | B | 34 | 2.830   | 0.794  | 9.566  | 1.00 | 0.00 | C |
| ATOM | 385 | C   | LEU | B | 34 | 1.693   | 1.788  | 9.771  | 1.00 | 0.00 | C |
| ATOM | 386 | O   | LEU | B | 34 | 1.194   | 1.902  | 10.903 | 1.00 | 0.00 | O |
| ATOM | 387 | CB  | LEU | B | 34 | 2.716   | -0.458 | 10.451 | 1.00 | 0.00 | C |
| ATOM | 388 | CG  | LEU | B | 34 | 3.892   | -1.405 | 10.246 | 1.00 | 0.00 | C |
| ATOM | 389 | CD1 | LEU | B | 34 | 3.820   | -2.400 | 11.404 | 1.00 | 0.00 | C |
| ATOM | 390 | CD2 | LEU | B | 34 | 3.732   | -2.170 | 8.927  | 1.00 | 0.00 | C |
| ATOM | 391 | H   | LEU | B | 34 | 4.506   | 1.153  | 10.697 | 1.00 | 0.00 | H |
| ATOM | 392 | N   | MET | B | 35 | 1.449   | 2.546  | 8.710  | 1.00 | 0.00 | N |
| ATOM | 393 | CA  | MET | B | 35 | 0.525   | 3.684  | 8.732  | 1.00 | 0.00 | C |
| ATOM | 394 | C   | MET | B | 35 | -0.933  | 3.254  | 8.526  | 1.00 | 0.00 | C |
| ATOM | 395 | O   | MET | B | 35 | -1.587  | 3.486  | 7.510  | 1.00 | 0.00 | O |
| ATOM | 396 | CB  | MET | B | 35 | 0.936   | 4.700  | 7.666  | 1.00 | 0.00 | C |
| ATOM | 397 | CG  | MET | B | 35 | 2.220   | 5.453  | 8.010  | 1.00 | 0.00 | C |
| ATOM | 398 | SD  | MET | B | 35 | 2.827   | 6.619  | 6.734  | 1.00 | 0.00 | S |
| ATOM | 399 | CE  | MET | B | 35 | 4.574   | 6.584  | 7.068  | 1.00 | 0.00 | C |
| ATOM | 400 | H   | MET | B | 35 | 1.783   | 2.213  | 7.829  | 1.00 | 0.00 | H |
| ATOM | 401 | N   | VAL | B | 36 | -1.364  | 2.455  | 9.498  | 1.00 | 0.00 | N |
| ATOM | 402 | CA  | VAL | B | 36 | -2.639  | 1.719  | 9.391  | 1.00 | 0.00 | C |
| ATOM | 403 | C   | VAL | B | 36 | -3.929  | 2.538  | 9.470  | 1.00 | 0.00 | C |
| ATOM | 404 | O   | VAL | B | 36 | -4.140  | 3.222  | 10.467 | 1.00 | 0.00 | O |
| ATOM | 405 | CB  | VAL | B | 36 | -2.626  | 0.575  | 10.407 | 1.00 | 0.00 | C |
| ATOM | 406 | CG1 | VAL | B | 36 | -1.520  | -0.381 | 9.941  | 1.00 | 0.00 | C |
| ATOM | 407 | CG2 | VAL | B | 36 | -2.414  | 0.997  | 11.862 | 1.00 | 0.00 | C |
| ATOM | 408 | H   | VAL | B | 36 | -1.103  | 2.502  | 10.454 | 1.00 | 0.00 | H |
| ATOM | 409 | N   | GLY | B | 37 | -4.864  | 2.131  | 8.627  | 1.00 | 0.00 | N |
| ATOM | 410 | CA  | GLY | B | 37 | -6.170  | 2.804  | 8.583  | 1.00 | 0.00 | C |
| ATOM | 411 | C   | GLY | B | 37 | -6.257  | 3.781  | 7.408  | 1.00 | 0.00 | C |
| ATOM | 412 | O   | GLY | B | 37 | -5.384  | 4.649  | 7.351  | 1.00 | 0.00 | O |
| ATOM | 413 | H   | GLY | B | 37 | -4.692  | 1.692  | 7.738  | 1.00 | 0.00 | H |
| ATOM | 414 | N   | GLY | B | 38 | -7.268  | 3.599  | 6.549  | 1.00 | 0.00 | N |
| ATOM | 415 | CA  | GLY | B | 38 | -7.460  | 4.502  | 5.413  | 1.00 | 0.00 | C |
| ATOM | 416 | C   | GLY | B | 38 | -8.037  | 5.893  | 5.652  | 1.00 | 0.00 | C |
| ATOM | 417 | O   | GLY | B | 38 | -8.755  | 6.073  | 6.640  | 1.00 | 0.00 | O |
| ATOM | 418 | H   | GLY | B | 38 | -7.949  | 2.873  | 6.480  | 1.00 | 0.00 | H |
| ATOM | 419 | N   | VAL | B | 39 | -7.571  | 6.874  | 4.881  | 1.00 | 0.00 | N |
| ATOM | 420 | CA  | VAL | B | 39 | -8.105  | 8.227  | 5.098  | 1.00 | 0.00 | C |
| ATOM | 421 | C   | VAL | B | 39 | -9.495  | 8.528  | 4.542  | 1.00 | 0.00 | C |
| ATOM | 422 | O   | VAL | B | 39 | -9.931  | 8.079  | 3.483  | 1.00 | 0.00 | O |
| ATOM | 423 | CB  | VAL | B | 39 | -7.097  | 9.350  | 4.861  | 1.00 | 0.00 | C |
| ATOM | 424 | CG1 | VAL | B | 39 | -5.881  | 9.243  | 5.782  | 1.00 | 0.00 | C |
| ATOM | 425 | CG2 | VAL | B | 39 | -6.619  | 9.399  | 3.406  | 1.00 | 0.00 | C |
| ATOM | 426 | H   | VAL | B | 39 | -7.188  | 6.583  | 3.998  | 1.00 | 0.00 | H |
| ATOM | 427 | N   | VAL | B | 40 | -10.299 | 9.215  | 5.354  | 1.00 | 0.00 | N |
| ATOM | 428 | CA  | VAL | B | 40 | -11.756 | 9.340  | 5.167  | 1.00 | 0.00 | C |
| ATOM | 429 | C   | VAL | B | 40 | -12.236 | 10.587 | 4.441  | 1.00 | 0.00 | C |
| ATOM | 430 | O   | VAL | B | 40 | -11.852 | 11.694 | 4.808  | 1.00 | 0.00 | O |
| ATOM | 431 | CB  | VAL | B | 40 | -12.499 | 9.249  | 6.500  | 1.00 | 0.00 | C |

|      |     |     |     |   |    |         |         |        |      |      |   |
|------|-----|-----|-----|---|----|---------|---------|--------|------|------|---|
| ATOM | 432 | CG1 | VAL | B | 40 | -13.997 | 8.907   | 6.432  | 1.00 | 0.00 | C |
| ATOM | 433 | CG2 | VAL | B | 40 | -11.916 | 8.153   | 7.397  | 1.00 | 0.00 | C |
| ATOM | 434 | H   | VAL | B | 40 | -9.964  | 9.831   | 6.059  | 1.00 | 0.00 | H |
| ATOM | 435 | N   | ILE | B | 41 | -13.114 | 10.294  | 3.480  | 1.00 | 0.00 | N |
| ATOM | 436 | CA  | ILE | B | 41 | -14.028 | 11.315  | 2.956  | 1.00 | 0.00 | C |
| ATOM | 437 | C   | ILE | B | 41 | -15.281 | 11.684  | 3.745  | 1.00 | 0.00 | C |
| ATOM | 438 | O   | ILE | B | 41 | -15.860 | 10.929  | 4.532  | 1.00 | 0.00 | O |
| ATOM | 439 | CB  | ILE | B | 41 | -14.478 | 11.073  | 1.510  | 1.00 | 0.00 | C |
| ATOM | 440 | CG1 | ILE | B | 41 | -15.095 | 9.685   | 1.329  | 1.00 | 0.00 | C |
| ATOM | 441 | CG2 | ILE | B | 41 | -13.238 | 11.216  | 0.619  | 1.00 | 0.00 | C |
| ATOM | 442 | CD  | ILE | B | 41 | -15.972 | 9.602   | 0.070  | 1.00 | 0.00 | C |
| ATOM | 443 | H   | ILE | B | 41 | -13.175 | 9.317   | 3.252  | 1.00 | 0.00 | H |
| ATOM | 444 | N   | ALA | B | 42 | -15.599 | 12.975  | 3.723  | 1.00 | 0.00 | N |
| ATOM | 445 | CA  | ALA | B | 42 | -16.731 | 13.628  | 4.388  | 1.00 | 0.00 | C |
| ATOM | 446 | C   | ALA | B | 42 | -16.842 | 15.090  | 3.946  | 1.00 | 0.00 | C |
| ATOM | 447 | CB  | ALA | B | 42 | -16.761 | 13.754  | 5.907  | 1.00 | 0.00 | C |
| ATOM | 448 | O1  | ALA | B | 42 | -18.013 | 15.526  | 3.818  | 1.00 | 0.00 | O |
| ATOM | 449 | O2  | ALA | B | 42 | -15.848 | 15.695  | 3.486  | 1.00 | 0.00 | O |
| ATOM | 450 | H   | ALA | B | 42 | -14.887 | 13.547  | 3.311  | 1.00 | 0.00 | H |
| ATOM | 451 | N   | LEU | C | 17 | -14.801 | -2.132  | 0.566  | 1.00 | 0.00 | N |
| ATOM | 452 | CA  | LEU | C | 17 | -14.129 | -2.999  | -0.409 | 1.00 | 0.00 | C |
| ATOM | 453 | C   | LEU | C | 17 | -12.781 | -3.544  | 0.051  | 1.00 | 0.00 | C |
| ATOM | 454 | O   | LEU | C | 17 | -12.204 | -2.974  | 0.978  | 1.00 | 0.00 | O |
| ATOM | 455 | CB  | LEU | C | 17 | -14.013 | -2.248  | -1.739 | 1.00 | 0.00 | C |
| ATOM | 456 | CG  | LEU | C | 17 | -15.298 | -1.819  | -2.448 | 1.00 | 0.00 | C |
| ATOM | 457 | CD1 | LEU | C | 17 | -15.317 | -0.438  | -3.105 | 1.00 | 0.00 | C |
| ATOM | 458 | CD2 | LEU | C | 17 | -15.491 | -2.788  | -3.626 | 1.00 | 0.00 | C |
| ATOM | 459 | H1  | LEU | C | 17 | -14.322 | -1.255  | 0.663  | 1.00 | 0.00 | H |
| ATOM | 460 | H2  | LEU | C | 17 | -15.721 | -1.872  | 0.261  | 1.00 | 0.00 | H |
| ATOM | 461 | H3  | LEU | C | 17 | -14.795 | -2.647  | 1.429  | 1.00 | 0.00 | H |
| ATOM | 462 | N   | VAL | C | 18 | -12.442 | -4.742  | -0.409 | 1.00 | 0.00 | N |
| ATOM | 463 | CA  | VAL | C | 18 | -11.237 | -5.494  | -0.016 | 1.00 | 0.00 | C |
| ATOM | 464 | C   | VAL | C | 18 | -10.072 | -5.391  | -1.000 | 1.00 | 0.00 | C |
| ATOM | 465 | O   | VAL | C | 18 | -10.064 | -5.835  | -2.154 | 1.00 | 0.00 | O |
| ATOM | 466 | CB  | VAL | C | 18 | -11.566 | -6.957  | 0.240  | 1.00 | 0.00 | C |
| ATOM | 467 | CG1 | VAL | C | 18 | -10.339 | -7.764  | 0.657  | 1.00 | 0.00 | C |
| ATOM | 468 | CG2 | VAL | C | 18 | -12.551 | -6.914  | 1.415  | 1.00 | 0.00 | C |
| ATOM | 469 | H   | VAL | C | 18 | -13.076 | -5.224  | -1.016 | 1.00 | 0.00 | H |
| ATOM | 470 | N   | PHE | C | 19 | -8.934  | -4.916  | -0.505 | 1.00 | 0.00 | N |
| ATOM | 471 | CA  | PHE | C | 19 | -7.696  | -4.862  | -1.303 | 1.00 | 0.00 | C |
| ATOM | 472 | C   | PHE | C | 19 | -6.642  | -5.704  | -0.588 | 1.00 | 0.00 | C |
| ATOM | 473 | O   | PHE | C | 19 | -6.559  | -5.749  | 0.646  | 1.00 | 0.00 | O |
| ATOM | 474 | CB  | PHE | C | 19 | -7.421  | -3.360  | -1.169 | 1.00 | 0.00 | C |
| ATOM | 475 | CG  | PHE | C | 19 | -6.062  | -2.960  | -1.725 | 1.00 | 0.00 | C |
| ATOM | 476 | CD1 | PHE | C | 19 | -4.999  | -2.803  | -0.839 | 1.00 | 0.00 | C |
| ATOM | 477 | CD2 | PHE | C | 19 | -5.911  | -2.950  | -3.109 | 1.00 | 0.00 | C |
| ATOM | 478 | CE1 | PHE | C | 19 | -3.726  | -2.555  | -1.343 | 1.00 | 0.00 | C |
| ATOM | 479 | CE2 | PHE | C | 19 | -4.640  | -2.675  | -3.591 | 1.00 | 0.00 | C |
| ATOM | 480 | CZ  | PHE | C | 19 | -3.578  | -2.451  | -2.724 | 1.00 | 0.00 | C |
| ATOM | 481 | H   | PHE | C | 19 | -8.933  | -4.733  | 0.475  | 1.00 | 0.00 | H |
| ATOM | 482 | HD1 | PHE | C | 19 | -5.094  | -3.219  | 0.168  | 1.00 | 0.00 | H |
| ATOM | 483 | HD2 | PHE | C | 19 | -6.760  | -3.169  | -3.755 | 1.00 | 0.00 | H |
| ATOM | 484 | HE1 | PHE | C | 19 | -2.982  | -2.177  | -0.643 | 1.00 | 0.00 | H |
| ATOM | 485 | HE2 | PHE | C | 19 | -4.477  | -2.581  | -4.655 | 1.00 | 0.00 | H |
| ATOM | 486 | HZ  | PHE | C | 19 | -2.579  | -2.280  | -3.141 | 1.00 | 0.00 | H |
| ATOM | 487 | N   | PHE | C | 20 | -5.670  | -6.168  | -1.361 | 1.00 | 0.00 | N |
| ATOM | 488 | CA  | PHE | C | 20 | -4.551  | -6.941  | -0.808 | 1.00 | 0.00 | C |
| ATOM | 489 | C   | PHE | C | 20 | -3.261  | -6.649  | -1.586 | 1.00 | 0.00 | C |
| ATOM | 490 | O   | PHE | C | 20 | -3.256  | -6.698  | -2.815 | 1.00 | 0.00 | O |
| ATOM | 491 | CB  | PHE | C | 20 | -4.943  | -8.388  | -1.085 | 1.00 | 0.00 | C |
| ATOM | 492 | CG  | PHE | C | 20 | -4.902  | -9.309  | 0.145  | 1.00 | 0.00 | C |
| ATOM | 493 | CD1 | PHE | C | 20 | -6.086  | -9.415  | 0.865  | 1.00 | 0.00 | C |
| ATOM | 494 | CD2 | PHE | C | 20 | -3.768  | -9.980  | 0.581  | 1.00 | 0.00 | C |
| ATOM | 495 | CE1 | PHE | C | 20 | -6.153  | -10.285 | 1.951  | 1.00 | 0.00 | C |
| ATOM | 496 | CE2 | PHE | C | 20 | -3.837  | -10.734 | 1.752  | 1.00 | 0.00 | C |
| ATOM | 497 | CZ  | PHE | C | 20 | -5.044  | -10.999 | 2.392  | 1.00 | 0.00 | C |
| ATOM | 498 | H   | PHE | C | 20 | -5.675  | -5.993  | -2.344 | 1.00 | 0.00 | H |
| ATOM | 499 | HD1 | PHE | C | 20 | -7.044  | -9.067  | 0.457  | 1.00 | 0.00 | H |

|      |     |      |     |   |    |        |         |        |      |      |     |
|------|-----|------|-----|---|----|--------|---------|--------|------|------|-----|
| ATOM | 500 | HD2  | PHE | C | 20 | -2.795 | -9.826  | 0.109  | 1.00 | 0.00 | H   |
| ATOM | 501 | HE1  | PHE | C | 20 | -7.116 | -10.430 | 2.440  | 1.00 | 0.00 | H   |
| ATOM | 502 | HE2  | PHE | C | 20 | -2.912 | -10.833 | 2.319  | 1.00 | 0.00 | H   |
| ATOM | 503 | HZ   | PHE | C | 20 | -5.108 | -11.713 | 3.210  | 1.00 | 0.00 | H   |
| ATOM | 504 | N    | ALA | C | 21 | -2.253 | -6.301  | -0.786 | 1.00 | 0.00 | N   |
| ATOM | 505 | CA   | ALA | C | 21 | -0.959 | -5.964  | -1.397 | 1.00 | 0.00 | C   |
| ATOM | 506 | C    | ALA | C | 21 | 0.302  | -6.759  | -1.094 | 1.00 | 0.00 | C   |
| ATOM | 507 | O    | ALA | C | 21 | 0.573  | -7.201  | 0.028  | 1.00 | 0.00 | O   |
| ATOM | 508 | CB   | ALA | C | 21 | -0.511 | -4.503  | -1.365 | 1.00 | 0.00 | C   |
| ATOM | 509 | H    | ALA | C | 21 | -2.450 | -5.904  | 0.109  | 1.00 | 0.00 | H   |
| ATOM | 510 | N    | GLU | C | 22 | 1.031  | -6.949  | -2.188 | 1.00 | 0.00 | N   |
| ATOM | 511 | CA   | GLU | C | 22 | 2.387  | -7.486  | -2.042 | 1.00 | 0.00 | C   |
| ATOM | 512 | C    | GLU | C | 22 | 3.447  | -6.616  | -2.734 | 1.00 | 0.00 | C   |
| ATOM | 513 | O    | GLU | C | 22 | 3.306  | -6.383  | -3.928 | 1.00 | 0.00 | O   |
| ATOM | 514 | CB   | GLU | C | 22 | 2.365  | -8.945  | -2.508 | 1.00 | 0.00 | C   |
| ATOM | 515 | CG   | GLU | C | 22 | 3.558  | -9.798  | -2.071 | 1.00 | 0.00 | C   |
| ATOM | 516 | CD   | GLU | C | 22 | 3.465  | -11.285 | -2.434 | 1.00 | 0.00 | C   |
| ATOM | 517 | OE1  | GLU | C | 22 | 3.853  | -12.078 | -1.549 | 1.00 | 0.00 | O   |
| ATOM | 518 | OE2  | GLU | C | 22 | 2.767  | -11.633 | -3.406 | 1.00 | 0.00 | O1- |
| ATOM | 519 | H    | GLU | C | 22 | 0.698  | -6.921  | -3.133 | 1.00 | 0.00 | H   |
| ATOM | 520 | N    | ASP | C | 23 | 4.126  | -5.827  | -1.905 | 1.00 | 0.00 | N   |
| ATOM | 521 | CA   | ASP | C | 23 | 5.276  | -5.016  | -2.333 | 1.00 | 0.00 | C   |
| ATOM | 522 | C    | ASP | C | 23 | 6.600  | -5.783  | -2.400 | 1.00 | 0.00 | C   |
| ATOM | 523 | O    | ASP | C | 23 | 7.033  | -6.257  | -1.357 | 1.00 | 0.00 | O   |
| ATOM | 524 | CB   | ASP | C | 23 | 5.420  | -3.802  | -1.407 | 1.00 | 0.00 | C   |
| ATOM | 525 | CG   | ASP | C | 23 | 6.481  | -2.797  | -1.879 | 1.00 | 0.00 | C   |
| ATOM | 526 | OD1  | ASP | C | 23 | 6.144  | -1.599  | -1.898 | 1.00 | 0.00 | O   |
| ATOM | 527 | OD2  | ASP | C | 23 | 7.643  | -3.134  | -2.226 | 1.00 | 0.00 | O1- |
| ATOM | 528 | H    | ASP | C | 23 | 4.135  | -5.993  | -0.923 | 1.00 | 0.00 | H   |
| ATOM | 529 | N    | VAL | C | 24 | 7.006  | -6.044  | -3.633 | 1.00 | 0.00 | N   |
| ATOM | 530 | CA   | VAL | C | 24 | 8.250  | -6.784  | -3.906 | 1.00 | 0.00 | C   |
| ATOM | 531 | C    | VAL | C | 24 | 9.478  | -6.013  | -4.398 | 1.00 | 0.00 | C   |
| ATOM | 532 | O    | VAL | C | 24 | 10.426 | -6.669  | -4.824 | 1.00 | 0.00 | O   |
| ATOM | 533 | CB   | VAL | C | 24 | 7.910  | -8.063  | -4.673 | 1.00 | 0.00 | C   |
| ATOM | 534 | CG1  | VAL | C | 24 | 6.917  | -8.883  | -3.853 | 1.00 | 0.00 | C   |
| ATOM | 535 | CG2  | VAL | C | 24 | 7.515  | -7.806  | -6.126 | 1.00 | 0.00 | C   |
| ATOM | 536 | H    | VAL | C | 24 | 6.393  | -5.976  | -4.424 | 1.00 | 0.00 | H   |
| ATOM | 537 | N    | GLY | C | 25 | 9.575  | -4.738  | -4.040 | 1.00 | 0.00 | N   |
| ATOM | 538 | CA   | GLY | C | 25 | 10.478 | -3.845  | -4.780 | 1.00 | 0.00 | C   |
| ATOM | 539 | C    | GLY | C | 25 | 11.889 | -3.673  | -4.212 | 1.00 | 0.00 | C   |
| ATOM | 540 | O    | GLY | C | 25 | 12.154 | -4.051  | -3.077 | 1.00 | 0.00 | O   |
| ATOM | 541 | H    | GLY | C | 25 | 9.274  | -4.389  | -3.158 | 1.00 | 0.00 | H   |
| ATOM | 542 | N    | SER | C | 26 | 12.810 | -3.569  | -5.168 | 1.00 | 0.00 | N   |
| ATOM | 543 | CA   | SER | C | 26 | 14.228 | -3.307  | -4.839 | 1.00 | 0.00 | C   |
| ATOM | 544 | C    | SER | C | 26 | 14.549 | -1.992  | -4.129 | 1.00 | 0.00 | C   |
| ATOM | 545 | O    | SER | C | 26 | 13.710 | -1.100  | -4.218 | 1.00 | 0.00 | O   |
| ATOM | 546 | CB   | SER | C | 26 | 15.025 | -3.604  | -6.100 | 1.00 | 0.00 | C   |
| ATOM | 547 | OG   | SER | C | 26 | 14.957 | -2.395  | -6.861 | 1.00 | 0.00 | O   |
| ATOM | 548 | H    | SER | C | 26 | 12.574 | -3.779  | -6.114 | 1.00 | 0.00 | H   |
| ATOM | 549 | HG   | SER | C | 26 | 15.723 | -2.404  | -7.506 | 1.00 | 0.00 | H   |
| ATOM | 550 | N    | ASN | C | 27 | 15.600 | -2.022  | -3.315 | 1.00 | 0.00 | N   |
| ATOM | 551 | CA   | ASN | C | 27 | 16.098 | -0.914  | -2.481 | 1.00 | 0.00 | C   |
| ATOM | 552 | C    | ASN | C | 27 | 15.093 | -0.174  | -1.601 | 1.00 | 0.00 | C   |
| ATOM | 553 | O    | ASN | C | 27 | 15.009 | 1.045   | -1.702 | 1.00 | 0.00 | O   |
| ATOM | 554 | CB   | ASN | C | 27 | 17.249 | -0.134  | -3.128 | 1.00 | 0.00 | C   |
| ATOM | 555 | CG   | ASN | C | 27 | 18.475 | -1.048  | -3.233 | 1.00 | 0.00 | C   |
| ATOM | 556 | ND2  | ASN | C | 27 | 19.616 | -0.658  | -2.677 | 1.00 | 0.00 | N   |
| ATOM | 557 | OD1  | ASN | C | 27 | 18.424 | -2.061  | -3.922 | 1.00 | 0.00 | O   |
| ATOM | 558 | H    | ASN | C | 27 | 16.279 | -2.720  | -3.551 | 1.00 | 0.00 | H   |
| ATOM | 559 | 1HD2 | ASN | C | 27 | 19.652 | 0.191   | -2.153 | 1.00 | 0.00 | H   |
| ATOM | 560 | 2HD2 | ASN | C | 27 | 20.396 | -1.286  | -2.670 | 1.00 | 0.00 | H   |
| ATOM | 561 | N    | LYS | C | 28 | 14.595 | -0.885  | -0.588 | 1.00 | 0.00 | N   |
| ATOM | 562 | CA   | LYS | C | 28 | 13.571 | -0.350  | 0.316  | 1.00 | 0.00 | C   |
| ATOM | 563 | C    | LYS | C | 28 | 14.196 | 0.661   | 1.289  | 1.00 | 0.00 | C   |
| ATOM | 564 | O    | LYS | C | 28 | 14.755 | 0.373   | 2.342  | 1.00 | 0.00 | O   |
| ATOM | 565 | CB   | LYS | C | 28 | 12.876 | -1.497  | 1.055  | 1.00 | 0.00 | C   |
| ATOM | 566 | CG   | LYS | C | 28 | 11.912 | -2.336  | 0.213  | 1.00 | 0.00 | C   |
| ATOM | 567 | CD   | LYS | C | 28 | 10.592 | -1.860  | -0.381 | 1.00 | 0.00 | C   |

|      |     |     |     |   |    |        |        |        |      |      |     |
|------|-----|-----|-----|---|----|--------|--------|--------|------|------|-----|
| ATOM | 568 | CE  | LYS | C | 28 | 9.527  | -1.404 | 0.627  | 1.00 | 0.00 | C   |
| ATOM | 569 | NZ  | LYS | C | 28 | 8.179  | -1.934 | 0.387  | 1.00 | 0.00 | N1+ |
| ATOM | 570 | H   | LYS | C | 28 | 14.823 | -1.834 | -0.377 | 1.00 | 0.00 | H   |
| ATOM | 571 | HZ1 | LYS | C | 28 | 8.113  | -2.105 | -0.595 | 1.00 | 0.00 | H   |
| ATOM | 572 | HZ2 | LYS | C | 28 | 8.168  | -2.848 | 0.812  | 1.00 | 0.00 | H   |
| ATOM | 573 | HZ3 | LYS | C | 28 | 7.418  | -1.375 | 0.707  | 1.00 | 0.00 | H   |
| ATOM | 574 | N   | GLY | C | 29 | 14.024 | 1.912  | 0.902  | 1.00 | 0.00 | N   |
| ATOM | 575 | CA  | GLY | C | 29 | 14.662 | 3.039  | 1.602  | 1.00 | 0.00 | C   |
| ATOM | 576 | C   | GLY | C | 29 | 14.374 | 3.316  | 3.082  | 1.00 | 0.00 | C   |
| ATOM | 577 | O   | GLY | C | 29 | 14.027 | 2.444  | 3.873  | 1.00 | 0.00 | O   |
| ATOM | 578 | H   | GLY | C | 29 | 13.835 | 2.112  | -0.060 | 1.00 | 0.00 | H   |
| ATOM | 579 | N   | ALA | C | 30 | 14.726 | 4.513  | 3.564  | 1.00 | 0.00 | N   |
| ATOM | 580 | CA  | ALA | C | 30 | 14.789 | 4.953  | 4.968  | 1.00 | 0.00 | C   |
| ATOM | 581 | C   | ALA | C | 30 | 13.428 | 4.965  | 5.667  | 1.00 | 0.00 | C   |
| ATOM | 582 | O   | ALA | C | 30 | 13.383 | 4.577  | 6.827  | 1.00 | 0.00 | O   |
| ATOM | 583 | CB  | ALA | C | 30 | 15.380 | 6.360  | 5.021  | 1.00 | 0.00 | C   |
| ATOM | 584 | H   | ALA | C | 30 | 15.342 | 5.019  | 2.961  | 1.00 | 0.00 | H   |
| ATOM | 585 | N   | ILE | C | 31 | 12.390 | 5.420  | 4.971  | 1.00 | 0.00 | N   |
| ATOM | 586 | CA  | ILE | C | 31 | 11.048 | 5.395  | 5.561  | 1.00 | 0.00 | C   |
| ATOM | 587 | C   | ILE | C | 31 | 10.134 | 4.463  | 4.755  | 1.00 | 0.00 | C   |
| ATOM | 588 | O   | ILE | C | 31 | 9.496  | 4.927  | 3.811  | 1.00 | 0.00 | O   |
| ATOM | 589 | CB  | ILE | C | 31 | 10.423 | 6.740  | 5.938  | 1.00 | 0.00 | C   |
| ATOM | 590 | CG1 | ILE | C | 31 | 11.221 | 7.194  | 7.154  | 1.00 | 0.00 | C   |
| ATOM | 591 | CG2 | ILE | C | 31 | 8.944  | 6.606  | 6.284  | 1.00 | 0.00 | C   |
| ATOM | 592 | CD  | ILE | C | 31 | 12.031 | 8.392  | 6.663  | 1.00 | 0.00 | C   |
| ATOM | 593 | H   | ILE | C | 31 | 12.542 | 5.931  | 4.126  | 1.00 | 0.00 | H   |
| ATOM | 594 | N   | ILE | C | 32 | 10.066 | 3.217  | 5.210  | 1.00 | 0.00 | N   |
| ATOM | 595 | CA  | ILE | C | 32 | 9.121  | 2.292  | 4.569  | 1.00 | 0.00 | C   |
| ATOM | 596 | C   | ILE | C | 32 | 7.685  | 2.478  | 5.064  | 1.00 | 0.00 | C   |
| ATOM | 597 | O   | ILE | C | 32 | 7.189  | 1.678  | 5.857  | 1.00 | 0.00 | O   |
| ATOM | 598 | CB  | ILE | C | 32 | 9.654  | 0.872  | 4.768  | 1.00 | 0.00 | C   |
| ATOM | 599 | CG1 | ILE | C | 32 | 11.169 | 0.855  | 4.565  | 1.00 | 0.00 | C   |
| ATOM | 600 | CG2 | ILE | C | 32 | 8.904  | -0.038 | 3.780  | 1.00 | 0.00 | C   |
| ATOM | 601 | CD  | ILE | C | 32 | 11.957 | -0.271 | 5.237  | 1.00 | 0.00 | C   |
| ATOM | 602 | H   | ILE | C | 32 | 10.504 | 2.909  | 6.058  | 1.00 | 0.00 | H   |
| ATOM | 603 | N   | GLY | C | 33 | 7.111  | 3.637  | 4.727  | 1.00 | 0.00 | N   |
| ATOM | 604 | CA  | GLY | C | 33 | 5.785  | 4.117  | 5.123  | 1.00 | 0.00 | C   |
| ATOM | 605 | C   | GLY | C | 33 | 4.668  | 3.408  | 4.357  | 1.00 | 0.00 | C   |
| ATOM | 606 | O   | GLY | C | 33 | 4.139  | 3.918  | 3.362  | 1.00 | 0.00 | O   |
| ATOM | 607 | H   | GLY | C | 33 | 7.571  | 4.286  | 4.118  | 1.00 | 0.00 | H   |
| ATOM | 608 | N   | LEU | C | 34 | 4.314  | 2.187  | 4.770  | 1.00 | 0.00 | N   |
| ATOM | 609 | CA  | LEU | C | 34 | 3.184  | 1.331  | 4.380  | 1.00 | 0.00 | C   |
| ATOM | 610 | C   | LEU | C | 34 | 1.860  | 1.874  | 4.901  | 1.00 | 0.00 | C   |
| ATOM | 611 | O   | LEU | C | 34 | 1.492  | 1.725  | 6.074  | 1.00 | 0.00 | O   |
| ATOM | 612 | CB  | LEU | C | 34 | 3.390  | -0.173 | 4.577  | 1.00 | 0.00 | C   |
| ATOM | 613 | CG  | LEU | C | 34 | 4.117  | -0.950 | 3.483  | 1.00 | 0.00 | C   |
| ATOM | 614 | CD1 | LEU | C | 34 | 5.630  | -0.770 | 3.524  | 1.00 | 0.00 | C   |
| ATOM | 615 | CD2 | LEU | C | 34 | 3.694  | -2.417 | 3.506  | 1.00 | 0.00 | C   |
| ATOM | 616 | H   | LEU | C | 34 | 4.923  | 1.784  | 5.453  | 1.00 | 0.00 | H   |
| ATOM | 617 | N   | MET | C | 35 | 1.160  | 2.641  | 4.073  | 1.00 | 0.00 | N   |
| ATOM | 618 | CA  | MET | C | 35 | -0.126 | 3.294  | 4.377  | 1.00 | 0.00 | C   |
| ATOM | 619 | C   | MET | C | 35 | -1.252 | 2.406  | 3.861  | 1.00 | 0.00 | C   |
| ATOM | 620 | O   | MET | C | 35 | -1.485 | 2.433  | 2.649  | 1.00 | 0.00 | O   |
| ATOM | 621 | CB  | MET | C | 35 | -0.275 | 4.718  | 3.841  | 1.00 | 0.00 | C   |
| ATOM | 622 | CG  | MET | C | 35 | 1.035  | 5.502  | 3.929  | 1.00 | 0.00 | C   |
| ATOM | 623 | SD  | MET | C | 35 | 0.694  | 7.215  | 3.379  | 1.00 | 0.00 | S   |
| ATOM | 624 | CE  | MET | C | 35 | 2.258  | 7.970  | 3.779  | 1.00 | 0.00 | C   |
| ATOM | 625 | H   | MET | C | 35 | 1.442  | 2.777  | 3.122  | 1.00 | 0.00 | H   |
| ATOM | 626 | N   | VAL | C | 36 | -1.844 | 1.562  | 4.701  | 1.00 | 0.00 | N   |
| ATOM | 627 | CA  | VAL | C | 36 | -2.843 | 0.536  | 4.365  | 1.00 | 0.00 | C   |
| ATOM | 628 | C   | VAL | C | 36 | -4.237 | 1.169  | 4.346  | 1.00 | 0.00 | C   |
| ATOM | 629 | O   | VAL | C | 36 | -4.893 | 1.252  | 5.376  | 1.00 | 0.00 | O   |
| ATOM | 630 | CB  | VAL | C | 36 | -2.891 | -0.568 | 5.420  | 1.00 | 0.00 | C   |
| ATOM | 631 | CG1 | VAL | C | 36 | -3.554 | -1.873 | 4.994  | 1.00 | 0.00 | C   |
| ATOM | 632 | CG2 | VAL | C | 36 | -1.475 | -0.955 | 5.874  | 1.00 | 0.00 | C   |
| ATOM | 633 | H   | VAL | C | 36 | -1.673 | 1.605  | 5.683  | 1.00 | 0.00 | H   |
| ATOM | 634 | N   | GLY | C | 37 | -4.595 | 1.674  | 3.167  | 1.00 | 0.00 | N   |
| ATOM | 635 | CA  | GLY | C | 37 | -5.916 | 2.271  | 2.939  | 1.00 | 0.00 | C   |



|      |     |     |     |   |    |         |        |         |      |      |   |
|------|-----|-----|-----|---|----|---------|--------|---------|------|------|---|
| ATOM | 636 | C   | GLY | C | 37 | -6.052  | 3.023  | 1.608   | 1.00 | 0.00 | C |
| ATOM | 637 | O   | GLY | C | 37 | -6.771  | 2.582  | 0.713   | 1.00 | 0.00 | O |
| ATOM | 638 | H   | GLY | C | 37 | -4.126  | 1.333  | 2.352   | 1.00 | 0.00 | H |
| ATOM | 639 | N   | GLY | C | 38 | -5.289  | 4.112  | 1.544   | 1.00 | 0.00 | N |
| ATOM | 640 | CA  | GLY | C | 38 | -5.460  | 5.256  | 0.645   | 1.00 | 0.00 | C |
| ATOM | 641 | C   | GLY | C | 38 | -6.767  | 5.946  | 1.050   | 1.00 | 0.00 | C |
| ATOM | 642 | O   | GLY | C | 38 | -7.142  | 5.869  | 2.216   | 1.00 | 0.00 | O |
| ATOM | 643 | H   | GLY | C | 38 | -4.596  | 4.264  | 2.244   | 1.00 | 0.00 | H |
| ATOM | 644 | N   | VAL | C | 39 | -7.296  | 6.640  | 0.047   | 1.00 | 0.00 | N |
| ATOM | 645 | CA  | VAL | C | 39 | -8.612  | 7.241  | 0.276   | 1.00 | 0.00 | C |
| ATOM | 646 | C   | VAL | C | 39 | -9.729  | 6.195  | 0.233   | 1.00 | 0.00 | C |
| ATOM | 647 | O   | VAL | C | 39 | -10.207 | 6.004  | -0.882  | 1.00 | 0.00 | O |
| ATOM | 648 | CB  | VAL | C | 39 | -8.820  | 8.463  | -0.622  | 1.00 | 0.00 | C |
| ATOM | 649 | CG1 | VAL | C | 39 | -10.088 | 9.285  | -0.351  | 1.00 | 0.00 | C |
| ATOM | 650 | CG2 | VAL | C | 39 | -7.672  | 9.476  | -0.608  | 1.00 | 0.00 | C |
| ATOM | 651 | H   | VAL | C | 39 | -7.215  | 6.457  | -0.935  | 1.00 | 0.00 | H |
| ATOM | 652 | N   | VAL | C | 40 | -10.322 | 5.867  | 1.373   | 1.00 | 0.00 | N |
| ATOM | 653 | CA  | VAL | C | 40 | -11.461 | 4.948  | 1.567   | 1.00 | 0.00 | C |
| ATOM | 654 | C   | VAL | C | 40 | -12.836 | 5.615  | 1.543   | 1.00 | 0.00 | C |
| ATOM | 655 | O   | VAL | C | 40 | -12.993 | 6.731  | 2.054   | 1.00 | 0.00 | O |
| ATOM | 656 | CB  | VAL | C | 40 | -11.513 | 4.108  | 2.846   | 1.00 | 0.00 | C |
| ATOM | 657 | CG1 | VAL | C | 40 | -10.831 | 2.756  | 2.640   | 1.00 | 0.00 | C |
| ATOM | 658 | CG2 | VAL | C | 40 | -10.940 | 4.858  | 4.048   | 1.00 | 0.00 | C |
| ATOM | 659 | H   | VAL | C | 40 | -10.240 | 6.516  | 2.130   | 1.00 | 0.00 | H |
| ATOM | 660 | N   | ILE | C | 41 | -13.796 | 4.892  | 0.972   | 1.00 | 0.00 | N |
| ATOM | 661 | CA  | ILE | C | 41 | -15.212 | 5.275  | 0.809   | 1.00 | 0.00 | C |
| ATOM | 662 | C   | ILE | C | 41 | -16.034 | 5.506  | 2.076   | 1.00 | 0.00 | C |
| ATOM | 663 | O   | ILE | C | 41 | -16.849 | 6.427  | 2.053   | 1.00 | 0.00 | O |
| ATOM | 664 | CB  | ILE | C | 41 | -15.890 | 4.285  | -0.138  | 1.00 | 0.00 | C |
| ATOM | 665 | CG1 | ILE | C | 41 | -15.218 | 4.044  | -1.487  | 1.00 | 0.00 | C |
| ATOM | 666 | CG2 | ILE | C | 41 | -17.403 | 4.490  | -0.307  | 1.00 | 0.00 | C |
| ATOM | 667 | CD  | ILE | C | 41 | -14.384 | 2.759  | -1.517  | 1.00 | 0.00 | C |
| ATOM | 668 | H   | ILE | C | 41 | -13.753 | 3.899  | 1.047   | 1.00 | 0.00 | H |
| ATOM | 669 | N   | ALA | C | 42 | -15.615 | 4.774  | 3.109   | 1.00 | 0.00 | N |
| ATOM | 670 | CA  | ALA | C | 42 | -16.161 | 4.715  | 4.470   | 1.00 | 0.00 | C |
| ATOM | 671 | C   | ALA | C | 42 | -15.249 | 3.793  | 5.276   | 1.00 | 0.00 | C |
| ATOM | 672 | CB  | ALA | C | 42 | -17.567 | 4.103  | 4.485   | 1.00 | 0.00 | C |
| ATOM | 673 | O1  | ALA | C | 42 | -14.946 | 2.655  | 4.859   | 1.00 | 0.00 | O |
| ATOM | 674 | O2  | ALA | C | 42 | -14.839 | 4.270  | 6.353   | 1.00 | 0.00 | O |
| ATOM | 675 | H   | ALA | C | 42 | -14.869 | 4.130  | 2.949   | 1.00 | 0.00 | H |
| ATOM | 676 | N   | LEU | D | 17 | -15.876 | -7.084 | -6.106  | 1.00 | 0.00 | N |
| ATOM | 677 | CA  | LEU | D | 17 | -14.613 | -7.556 | -6.692  | 1.00 | 0.00 | C |
| ATOM | 678 | C   | LEU | D | 17 | -13.396 | -7.242 | -5.805  | 1.00 | 0.00 | C |
| ATOM | 679 | O   | LEU | D | 17 | -13.261 | -6.094 | -5.387  | 1.00 | 0.00 | O |
| ATOM | 680 | CB  | LEU | D | 17 | -14.476 | -6.941 | -8.082  | 1.00 | 0.00 | C |
| ATOM | 681 | CG  | LEU | D | 17 | -13.221 | -7.256 | -8.892  | 1.00 | 0.00 | C |
| ATOM | 682 | CD1 | LEU | D | 17 | -12.898 | -8.753 | -8.926  | 1.00 | 0.00 | C |
| ATOM | 683 | CD2 | LEU | D | 17 | -13.334 | -6.787 | -10.349 | 1.00 | 0.00 | C |
| ATOM | 684 | H1  | LEU | D | 17 | -16.367 | -6.602 | -6.831  | 1.00 | 0.00 | H |
| ATOM | 685 | H2  | LEU | D | 17 | -16.536 | -7.784 | -5.826  | 1.00 | 0.00 | H |
| ATOM | 686 | H3  | LEU | D | 17 | -15.768 | -6.521 | -5.285  | 1.00 | 0.00 | H |
| ATOM | 687 | N   | VAL | D | 18 | -12.608 | -8.238 | -5.433  | 1.00 | 0.00 | N |
| ATOM | 688 | CA  | VAL | D | 18 | -11.374 | -8.028 | -4.647  | 1.00 | 0.00 | C |
| ATOM | 689 | C   | VAL | D | 18 | -10.223 | -7.535 | -5.527  | 1.00 | 0.00 | C |
| ATOM | 690 | O   | VAL | D | 18 | -9.877  | -8.312 | -6.409  | 1.00 | 0.00 | O |
| ATOM | 691 | CB  | VAL | D | 18 | -11.116 | -9.334 | -3.900  | 1.00 | 0.00 | C |
| ATOM | 692 | CG1 | VAL | D | 18 | -9.855  | -9.345 | -3.022  | 1.00 | 0.00 | C |
| ATOM | 693 | CG2 | VAL | D | 18 | -12.281 | -9.651 | -2.971  | 1.00 | 0.00 | C |
| ATOM | 694 | H   | VAL | D | 18 | -12.792 | -9.186 | -5.688  | 1.00 | 0.00 | H |
| ATOM | 695 | N   | PHE | D | 19 | -9.334  | -6.786 | -4.884  | 1.00 | 0.00 | N |
| ATOM | 696 | CA  | PHE | D | 19 | -8.186  | -6.221 | -5.596  | 1.00 | 0.00 | C |
| ATOM | 697 | C   | PHE | D | 19 | -6.818  | -6.650 | -5.056  | 1.00 | 0.00 | C |
| ATOM | 698 | O   | PHE | D | 19 | -6.344  | -6.051 | -4.089  | 1.00 | 0.00 | O |
| ATOM | 699 | CB  | PHE | D | 19 | -8.314  | -4.695 | -5.575  | 1.00 | 0.00 | C |
| ATOM | 700 | CG  | PHE | D | 19 | -7.477  | -3.932 | -6.600  | 1.00 | 0.00 | C |
| ATOM | 701 | CD1 | PHE | D | 19 | -8.045  | -3.410 | -7.751  | 1.00 | 0.00 | C |
| ATOM | 702 | CD2 | PHE | D | 19 | -6.098  | -3.758 | -6.470  | 1.00 | 0.00 | C |
| ATOM | 703 | CE1 | PHE | D | 19 | -7.325  | -2.789 | -8.766  | 1.00 | 0.00 | C |

|      |     |     |     |   |    |        |         |         |      |      |     |
|------|-----|-----|-----|---|----|--------|---------|---------|------|------|-----|
| ATOM | 704 | CE2 | PHE | D | 19 | -5.348 | -3.138  | -7.463  | 1.00 | 0.00 | C   |
| ATOM | 705 | CZ  | PHE | D | 19 | -5.943 | -2.660  | -8.617  | 1.00 | 0.00 | C   |
| ATOM | 706 | H   | PHE | D | 19 | -9.458 | -6.425  | -3.958  | 1.00 | 0.00 | H   |
| ATOM | 707 | HD1 | PHE | D | 19 | -9.106 | -3.595  | -7.920  | 1.00 | 0.00 | H   |
| ATOM | 708 | HD2 | PHE | D | 19 | -5.584 | -4.200  | -5.625  | 1.00 | 0.00 | H   |
| ATOM | 709 | HE1 | PHE | D | 19 | -7.815 | -2.523  | -9.704  | 1.00 | 0.00 | H   |
| ATOM | 710 | HE2 | PHE | D | 19 | -4.291 | -2.936  | -7.261  | 1.00 | 0.00 | H   |
| ATOM | 711 | HZ  | PHE | D | 19 | -5.412 | -2.027  | -9.318  | 1.00 | 0.00 | H   |
| ATOM | 712 | N   | PHE | D | 20 | -6.101 | -7.516  | -5.763  | 1.00 | 0.00 | N   |
| ATOM | 713 | CA  | PHE | D | 20 | -4.706 | -7.840  | -5.427  | 1.00 | 0.00 | C   |
| ATOM | 714 | C   | PHE | D | 20 | -3.725 | -6.921  | -6.159  | 1.00 | 0.00 | C   |
| ATOM | 715 | O   | PHE | D | 20 | -3.946 | -6.544  | -7.306  | 1.00 | 0.00 | O   |
| ATOM | 716 | CB  | PHE | D | 20 | -4.408 | -9.313  | -5.714  | 1.00 | 0.00 | C   |
| ATOM | 717 | CG  | PHE | D | 20 | -3.160 | -9.736  | -4.943  | 1.00 | 0.00 | C   |
| ATOM | 718 | CD1 | PHE | D | 20 | -3.317 | -10.166 | -3.626  | 1.00 | 0.00 | C   |
| ATOM | 719 | CD2 | PHE | D | 20 | -1.917 | -9.625  | -5.554  | 1.00 | 0.00 | C   |
| ATOM | 720 | CE1 | PHE | D | 20 | -2.154 | -10.436 | -2.922  | 1.00 | 0.00 | C   |
| ATOM | 721 | CE2 | PHE | D | 20 | -0.788 | -9.937  | -4.799  | 1.00 | 0.00 | C   |
| ATOM | 722 | CZ  | PHE | D | 20 | -0.879 | -10.358 | -3.481  | 1.00 | 0.00 | C   |
| ATOM | 723 | H   | PHE | D | 20 | -6.464 | -7.741  | -6.662  | 1.00 | 0.00 | H   |
| ATOM | 724 | HD1 | PHE | D | 20 | -4.264 | -10.452 | -3.165  | 1.00 | 0.00 | H   |
| ATOM | 725 | HD2 | PHE | D | 20 | -1.863 | -9.233  | -6.572  | 1.00 | 0.00 | H   |
| ATOM | 726 | HE1 | PHE | D | 20 | -2.214 | -10.679 | -1.859  | 1.00 | 0.00 | H   |
| ATOM | 727 | HE2 | PHE | D | 20 | 0.209  | -9.848  | -5.227  | 1.00 | 0.00 | H   |
| ATOM | 728 | HZ  | PHE | D | 20 | 0.030  | -10.362 | -2.876  | 1.00 | 0.00 | H   |
| ATOM | 729 | N   | ALA | D | 21 | -2.731 | -6.423  | -5.424  | 1.00 | 0.00 | N   |
| ATOM | 730 | CA  | ALA | D | 21 | -1.623 | -5.686  | -6.049  | 1.00 | 0.00 | C   |
| ATOM | 731 | C   | ALA | D | 21 | -0.230 | -6.292  | -5.842  | 1.00 | 0.00 | C   |
| ATOM | 732 | O   | ALA | D | 21 | 0.219  | -6.404  | -4.703  | 1.00 | 0.00 | O   |
| ATOM | 733 | CB  | ALA | D | 21 | -1.572 | -4.256  | -5.509  | 1.00 | 0.00 | C   |
| ATOM | 734 | H   | ALA | D | 21 | -2.782 | -6.569  | -4.445  | 1.00 | 0.00 | H   |
| ATOM | 735 | N   | GLU | D | 22 | 0.588  | -6.259  | -6.885  | 1.00 | 0.00 | N   |
| ATOM | 736 | CA  | GLU | D | 22 | 1.967  | -6.778  | -6.860  | 1.00 | 0.00 | C   |
| ATOM | 737 | C   | GLU | D | 22 | 2.888  | -5.748  | -7.531  | 1.00 | 0.00 | C   |
| ATOM | 738 | O   | GLU | D | 22 | 2.869  | -5.491  | -8.727  | 1.00 | 0.00 | O   |
| ATOM | 739 | CB  | GLU | D | 22 | 2.043  | -8.194  | -7.446  | 1.00 | 0.00 | C   |
| ATOM | 740 | CG  | GLU | D | 22 | 3.285  | -8.988  | -7.044  | 1.00 | 0.00 | C   |
| ATOM | 741 | CD  | GLU | D | 22 | 3.460  | -10.319 | -7.792  | 1.00 | 0.00 | C   |
| ATOM | 742 | OE1 | GLU | D | 22 | 2.963  | -11.392 | -7.388  | 1.00 | 0.00 | O   |
| ATOM | 743 | OE2 | GLU | D | 22 | 4.216  | -10.291 | -8.786  | 1.00 | 0.00 | O1- |
| ATOM | 744 | H   | GLU | D | 22 | 0.269  | -5.980  | -7.798  | 1.00 | 0.00 | H   |
| ATOM | 745 | N   | ASP | D | 23 | 3.179  | -4.784  | -6.661  | 1.00 | 0.00 | N   |
| ATOM | 746 | CA  | ASP | D | 23 | 4.096  | -3.713  | -7.060  | 1.00 | 0.00 | C   |
| ATOM | 747 | C   | ASP | D | 23 | 5.511  | -4.266  | -7.212  | 1.00 | 0.00 | C   |
| ATOM | 748 | O   | ASP | D | 23 | 6.380  | -4.053  | -6.364  | 1.00 | 0.00 | O   |
| ATOM | 749 | CB  | ASP | D | 23 | 3.973  | -2.510  | -6.121  | 1.00 | 0.00 | C   |
| ATOM | 750 | CG  | ASP | D | 23 | 4.792  | -1.321  | -6.645  | 1.00 | 0.00 | C   |
| ATOM | 751 | OD1 | ASP | D | 23 | 4.540  | -0.227  | -6.087  | 1.00 | 0.00 | O   |
| ATOM | 752 | OD2 | ASP | D | 23 | 5.597  | -1.507  | -7.574  | 1.00 | 0.00 | O1- |
| ATOM | 753 | H   | ASP | D | 23 | 2.859  | -4.739  | -5.717  | 1.00 | 0.00 | H   |
| ATOM | 754 | N   | VAL | D | 24 | 5.796  | -4.690  | -8.444  | 1.00 | 0.00 | N   |
| ATOM | 755 | CA  | VAL | D | 24 | 7.099  | -5.147  | -8.926  | 1.00 | 0.00 | C   |
| ATOM | 756 | C   | VAL | D | 24 | 8.131  | -4.051  | -9.191  | 1.00 | 0.00 | C   |
| ATOM | 757 | O   | VAL | D | 24 | 9.174  | -4.255  | -9.803  | 1.00 | 0.00 | O   |
| ATOM | 758 | CB  | VAL | D | 24 | 6.955  | -6.079  | -10.138 | 1.00 | 0.00 | C   |
| ATOM | 759 | CG1 | VAL | D | 24 | 6.399  | -7.462  | -9.796  | 1.00 | 0.00 | C   |
| ATOM | 760 | CG2 | VAL | D | 24 | 6.324  | -5.405  | -11.362 | 1.00 | 0.00 | C   |
| ATOM | 761 | H   | VAL | D | 24 | 5.066  | -4.669  | -9.130  | 1.00 | 0.00 | H   |
| ATOM | 762 | N   | GLY | D | 25 | 7.699  | -2.839  | -8.829  | 1.00 | 0.00 | N   |
| ATOM | 763 | CA  | GLY | D | 25 | 8.396  | -1.558  | -9.016  | 1.00 | 0.00 | C   |
| ATOM | 764 | C   | GLY | D | 25 | 9.712  | -1.510  | -8.235  | 1.00 | 0.00 | C   |
| ATOM | 765 | O   | GLY | D | 25 | 9.838  | -1.818  | -7.059  | 1.00 | 0.00 | O   |
| ATOM | 766 | H   | GLY | D | 25 | 6.968  | -2.743  | -8.162  | 1.00 | 0.00 | H   |
| ATOM | 767 | N   | SER | D | 26 | 10.748 | -1.091  | -8.949  | 1.00 | 0.00 | N   |
| ATOM | 768 | CA  | SER | D | 26 | 12.118 | -1.104  | -8.392  | 1.00 | 0.00 | C   |
| ATOM | 769 | C   | SER | D | 26 | 12.653 | 0.276   | -8.022  | 1.00 | 0.00 | C   |
| ATOM | 770 | O   | SER | D | 26 | 12.171 | 1.343   | -8.397  | 1.00 | 0.00 | O   |
| ATOM | 771 | CB  | SER | D | 26 | 13.025 | -1.869  | -9.349  | 1.00 | 0.00 | C   |

|      |     |      |     |   |    |        |        |         |      |      |     |
|------|-----|------|-----|---|----|--------|--------|---------|------|------|-----|
| ATOM | 772 | OG   | SER | D | 26 | 13.076 | -1.200 | -10.611 | 1.00 | 0.00 | O   |
| ATOM | 773 | H    | SER | D | 26 | 10.610 | -0.567 | -9.784  | 1.00 | 0.00 | H   |
| ATOM | 774 | HG   | SER | D | 26 | 14.001 | -0.824 | -10.680 | 1.00 | 0.00 | H   |
| ATOM | 775 | N    | ASN | D | 27 | 13.731 | 0.132  | -7.250  | 1.00 | 0.00 | N   |
| ATOM | 776 | CA   | ASN | D | 27 | 14.492 | 1.189  | -6.564  | 1.00 | 0.00 | C   |
| ATOM | 777 | C    | ASN | D | 27 | 13.641 | 2.157  | -5.744  | 1.00 | 0.00 | C   |
| ATOM | 778 | O    | ASN | D | 27 | 13.246 | 3.237  | -6.175  | 1.00 | 0.00 | O   |
| ATOM | 779 | CB   | ASN | D | 27 | 15.487 | 1.825  | -7.533  | 1.00 | 0.00 | C   |
| ATOM | 780 | CG   | ASN | D | 27 | 16.298 | 2.969  | -6.933  | 1.00 | 0.00 | C   |
| ATOM | 781 | ND2  | ASN | D | 27 | 16.651 | 4.006  | -7.671  | 1.00 | 0.00 | N   |
| ATOM | 782 | OD1  | ASN | D | 27 | 16.875 | 2.895  | -5.840  | 1.00 | 0.00 | O   |
| ATOM | 783 | H    | ASN | D | 27 | 14.061 | -0.761 | -6.974  | 1.00 | 0.00 | H   |
| ATOM | 784 | 1HD2 | ASN | D | 27 | 16.413 | 4.047  | -8.642  | 1.00 | 0.00 | H   |
| ATOM | 785 | 2HD2 | ASN | D | 27 | 17.128 | 4.780  | -7.253  | 1.00 | 0.00 | H   |
| ATOM | 786 | N    | LYS | D | 28 | 13.098 | 1.583  | -4.674  | 1.00 | 0.00 | N   |
| ATOM | 787 | CA   | LYS | D | 28 | 12.143 | 2.167  | -3.717  | 1.00 | 0.00 | C   |
| ATOM | 788 | C    | LYS | D | 28 | 12.879 | 2.948  | -2.634  | 1.00 | 0.00 | C   |
| ATOM | 789 | O    | LYS | D | 28 | 12.688 | 2.668  | -1.451  | 1.00 | 0.00 | O   |
| ATOM | 790 | CB   | LYS | D | 28 | 11.191 | 1.049  | -3.299  | 1.00 | 0.00 | C   |
| ATOM | 791 | CG   | LYS | D | 28 | 9.950  | 1.082  | -4.193  | 1.00 | 0.00 | C   |
| ATOM | 792 | CD   | LYS | D | 28 | 9.053  | -0.111 | -3.844  | 1.00 | 0.00 | C   |
| ATOM | 793 | CE   | LYS | D | 28 | 7.995  | -0.152 | -4.947  | 1.00 | 0.00 | C   |
| ATOM | 794 | NZ   | LYS | D | 28 | 7.237  | -1.407 | -4.899  | 1.00 | 0.00 | N1+ |
| ATOM | 795 | H    | LYS | D | 28 | 13.313 | 0.634  | -4.429  | 1.00 | 0.00 | H   |
| ATOM | 796 | HZ1  | LYS | D | 28 | 7.595  | -2.283 | -5.213  | 1.00 | 0.00 | H   |
| ATOM | 797 | HZ2  | LYS | D | 28 | 6.863  | -1.520 | -3.983  | 1.00 | 0.00 | H   |
| ATOM | 798 | HZ3  | LYS | D | 28 | 6.448  | -1.298 | -5.515  | 1.00 | 0.00 | H   |
| ATOM | 799 | N    | GLY | D | 29 | 13.634 | 3.970  | -3.039  | 1.00 | 0.00 | N   |
| ATOM | 800 | CA   | GLY | D | 29 | 14.428 | 4.811  | -2.127  | 1.00 | 0.00 | C   |
| ATOM | 801 | C    | GLY | D | 29 | 13.765 | 5.624  | -1.010  | 1.00 | 0.00 | C   |
| ATOM | 802 | O    | GLY | D | 29 | 12.645 | 6.106  | -1.099  | 1.00 | 0.00 | O   |
| ATOM | 803 | H    | GLY | D | 29 | 13.523 | 4.304  | -3.969  | 1.00 | 0.00 | H   |
| ATOM | 804 | N    | ALA | D | 30 | 14.627 | 6.079  | -0.104  | 1.00 | 0.00 | N   |
| ATOM | 805 | CA   | ALA | D | 30 | 14.296 | 7.147  | 0.851   | 1.00 | 0.00 | C   |
| ATOM | 806 | C    | ALA | D | 30 | 12.891 | 7.184  | 1.469   | 1.00 | 0.00 | C   |
| ATOM | 807 | O    | ALA | D | 30 | 12.450 | 6.210  | 2.067   | 1.00 | 0.00 | O   |
| ATOM | 808 | CB   | ALA | D | 30 | 14.748 | 8.451  | 0.193   | 1.00 | 0.00 | C   |
| ATOM | 809 | H    | ALA | D | 30 | 15.550 | 5.725  | 0.033   | 1.00 | 0.00 | H   |
| ATOM | 810 | N    | ILE | D | 31 | 12.207 | 8.321  | 1.371   | 1.00 | 0.00 | N   |
| ATOM | 811 | CA   | ILE | D | 31 | 10.928 | 8.629  | 2.031   | 1.00 | 0.00 | C   |
| ATOM | 812 | C    | ILE | D | 31 | 9.707  | 8.011  | 1.339   | 1.00 | 0.00 | C   |
| ATOM | 813 | O    | ILE | D | 31 | 8.656  | 8.632  | 1.201   | 1.00 | 0.00 | O   |
| ATOM | 814 | CB   | ILE | D | 31 | 10.799 | 10.101 | 2.405   | 1.00 | 0.00 | C   |
| ATOM | 815 | CG1  | ILE | D | 31 | 11.012 | 11.115 | 1.280   | 1.00 | 0.00 | C   |
| ATOM | 816 | CG2  | ILE | D | 31 | 11.661 | 10.418 | 3.631   | 1.00 | 0.00 | C   |
| ATOM | 817 | CD   | ILE | D | 31 | 9.655  | 11.459 | 0.664   | 1.00 | 0.00 | C   |
| ATOM | 818 | H    | ILE | D | 31 | 12.340 | 9.066  | 0.722   | 1.00 | 0.00 | H   |
| ATOM | 819 | N    | ILE | D | 32 | 9.743  | 6.732  | 0.995   | 1.00 | 0.00 | N   |
| ATOM | 820 | CA   | ILE | D | 32 | 8.554  | 6.170  | 0.336   | 1.00 | 0.00 | C   |
| ATOM | 821 | C    | ILE | D | 32 | 7.289  | 5.988  | 1.181   | 1.00 | 0.00 | C   |
| ATOM | 822 | O    | ILE | D | 32 | 7.064  | 5.043  | 1.925   | 1.00 | 0.00 | O   |
| ATOM | 823 | CB   | ILE | D | 32 | 9.055  | 4.887  | -0.338  | 1.00 | 0.00 | C   |
| ATOM | 824 | CG1  | ILE | D | 32 | 9.827  | 3.905  | 0.559   | 1.00 | 0.00 | C   |
| ATOM | 825 | CG2  | ILE | D | 32 | 9.707  | 5.284  | -1.661  | 1.00 | 0.00 | C   |
| ATOM | 826 | CD   | ILE | D | 32 | 9.234  | 2.538  | 0.215   | 1.00 | 0.00 | C   |
| ATOM | 827 | H    | ILE | D | 32 | 10.301 | 6.108  | 1.543   | 1.00 | 0.00 | H   |
| ATOM | 828 | N    | GLY | D | 33 | 6.288  | 6.782  | 0.824   | 1.00 | 0.00 | N   |
| ATOM | 829 | CA   | GLY | D | 33 | 4.894  | 6.805  | 1.304   | 1.00 | 0.00 | C   |
| ATOM | 830 | C    | GLY | D | 33 | 4.054  | 5.810  | 0.507   | 1.00 | 0.00 | C   |
| ATOM | 831 | O    | GLY | D | 33 | 3.408  | 6.131  | -0.500  | 1.00 | 0.00 | O   |
| ATOM | 832 | H    | GLY | D | 33 | 6.372  | 7.449  | 0.084   | 1.00 | 0.00 | H   |
| ATOM | 833 | N    | LEU | D | 34 | 4.108  | 4.526  | 0.844   | 1.00 | 0.00 | N   |
| ATOM | 834 | CA   | LEU | D | 34 | 3.490  | 3.416  | 0.097   | 1.00 | 0.00 | C   |
| ATOM | 835 | C    | LEU | D | 34 | 1.984  | 3.356  | 0.368   | 1.00 | 0.00 | C   |
| ATOM | 836 | O    | LEU | D | 34 | 1.533  | 2.714  | 1.317   | 1.00 | 0.00 | O   |
| ATOM | 837 | CB   | LEU | D | 34 | 4.121  | 2.053  | 0.351   | 1.00 | 0.00 | C   |
| ATOM | 838 | CG   | LEU | D | 34 | 5.155  | 1.907  | -0.777  | 1.00 | 0.00 | C   |
| ATOM | 839 | CD1  | LEU | D | 34 | 6.224  | 0.940  | -0.245  | 1.00 | 0.00 | C   |

|      |     |     |     |   |    |         |         |         |      |      |   |
|------|-----|-----|-----|---|----|---------|---------|---------|------|------|---|
| ATOM | 840 | CD2 | LEU | D | 34 | 4.729   | 1.664   | -2.220  | 1.00 | 0.00 | C |
| ATOM | 841 | H   | LEU | D | 34 | 4.380   | 4.263   | 1.771   | 1.00 | 0.00 | H |
| ATOM | 842 | N   | MET | D | 35 | 1.219   | 4.162   | -0.358  | 1.00 | 0.00 | N |
| ATOM | 843 | CA  | MET | D | 35 | -0.238  | 4.306   | -0.253  | 1.00 | 0.00 | C |
| ATOM | 844 | C   | MET | D | 35 | -0.953  | 3.089   | -0.829  | 1.00 | 0.00 | C |
| ATOM | 845 | O   | MET | D | 35 | -1.341  | 3.072   | -1.988  | 1.00 | 0.00 | O |
| ATOM | 846 | CB  | MET | D | 35 | -0.751  | 5.577   | -0.938  | 1.00 | 0.00 | C |
| ATOM | 847 | CG  | MET | D | 35 | -0.444  | 6.835   | -0.120  | 1.00 | 0.00 | C |
| ATOM | 848 | SD  | MET | D | 35 | -1.013  | 8.482   | -0.658  | 1.00 | 0.00 | S |
| ATOM | 849 | CE  | MET | D | 35 | -2.756  | 8.364   | -0.341  | 1.00 | 0.00 | C |
| ATOM | 850 | H   | MET | D | 35 | 1.583   | 4.580   | -1.192  | 1.00 | 0.00 | H |
| ATOM | 851 | N   | VAL | D | 36 | -0.979  | 2.002   | -0.060  | 1.00 | 0.00 | N |
| ATOM | 852 | CA  | VAL | D | 36 | -1.333  | 0.625   | -0.430  | 1.00 | 0.00 | C |
| ATOM | 853 | C   | VAL | D | 36 | -2.862  | 0.642   | -0.359  | 1.00 | 0.00 | C |
| ATOM | 854 | O   | VAL | D | 36 | -3.410  | 0.799   | 0.725   | 1.00 | 0.00 | O |
| ATOM | 855 | CB  | VAL | D | 36 | -0.558  | -0.518  | 0.234   | 1.00 | 0.00 | C |
| ATOM | 856 | CG1 | VAL | D | 36 | 0.768   | -0.788  | -0.469  | 1.00 | 0.00 | C |
| ATOM | 857 | CG2 | VAL | D | 36 | -0.257  | -0.281  | 1.713   | 1.00 | 0.00 | C |
| ATOM | 858 | H   | VAL | D | 36 | -0.736  | 2.050   | 0.911   | 1.00 | 0.00 | H |
| ATOM | 859 | N   | GLY | D | 37 | -3.554  | 0.786   | -1.491  | 1.00 | 0.00 | N |
| ATOM | 860 | CA  | GLY | D | 37 | -5.004  | 0.983   | -1.470  | 1.00 | 0.00 | C |
| ATOM | 861 | C   | GLY | D | 37 | -5.687  | 1.767   | -2.604  | 1.00 | 0.00 | C |
| ATOM | 862 | O   | GLY | D | 37 | -5.125  | 1.820   | -3.699  | 1.00 | 0.00 | O |
| ATOM | 863 | H   | GLY | D | 37 | -3.157  | 0.490   | -2.357  | 1.00 | 0.00 | H |
| ATOM | 864 | N   | GLY | D | 38 | -6.902  | 2.205   | -2.313  | 1.00 | 0.00 | N |
| ATOM | 865 | CA  | GLY | D | 38 | -7.794  | 2.930   | -3.222  | 1.00 | 0.00 | C |
| ATOM | 866 | C   | GLY | D | 38 | -7.836  | 4.451   | -3.060  | 1.00 | 0.00 | C |
| ATOM | 867 | O   | GLY | D | 38 | -7.248  | 4.940   | -2.096  | 1.00 | 0.00 | O |
| ATOM | 868 | H   | GLY | D | 38 | -7.225  | 2.139   | -1.360  | 1.00 | 0.00 | H |
| ATOM | 869 | N   | VAL | D | 39 | -8.249  | 5.116   | -4.137  | 1.00 | 0.00 | N |
| ATOM | 870 | CA  | VAL | D | 39 | -8.584  | 6.556   | -4.153  | 1.00 | 0.00 | C |
| ATOM | 871 | C   | VAL | D | 39 | -9.907  | 6.943   | -4.820  | 1.00 | 0.00 | C |
| ATOM | 872 | O   | VAL | D | 39 | -10.248 | 6.484   | -5.906  | 1.00 | 0.00 | O |
| ATOM | 873 | CB  | VAL | D | 39 | -7.491  | 7.504   | -4.645  | 1.00 | 0.00 | C |
| ATOM | 874 | CG1 | VAL | D | 39 | -6.345  | 7.679   | -3.637  | 1.00 | 0.00 | C |
| ATOM | 875 | CG2 | VAL | D | 39 | -6.872  | 7.267   | -6.021  | 1.00 | 0.00 | C |
| ATOM | 876 | H   | VAL | D | 39 | -8.127  | 4.670   | -5.022  | 1.00 | 0.00 | H |
| ATOM | 877 | N   | VAL | D | 40 | -10.692 | 7.633   | -3.992  | 1.00 | 0.00 | N |
| ATOM | 878 | CA  | VAL | D | 40 | -12.066 | 7.996   | -4.375  | 1.00 | 0.00 | C |
| ATOM | 879 | C   | VAL | D | 40 | -12.193 | 9.065   | -5.464  | 1.00 | 0.00 | C |
| ATOM | 880 | O   | VAL | D | 40 | -11.767 | 10.196  | -5.244  | 1.00 | 0.00 | O |
| ATOM | 881 | CB  | VAL | D | 40 | -12.873 | 8.365   | -3.131  | 1.00 | 0.00 | C |
| ATOM | 882 | CG1 | VAL | D | 40 | -14.311 | 8.821   | -3.432  | 1.00 | 0.00 | C |
| ATOM | 883 | CG2 | VAL | D | 40 | -12.955 | 7.174   | -2.181  | 1.00 | 0.00 | C |
| ATOM | 884 | H   | VAL | D | 40 | -10.551 | 7.638   | -2.992  | 1.00 | 0.00 | H |
| ATOM | 885 | N   | ILE | D | 41 | -13.001 | 8.629   | -6.427  | 1.00 | 0.00 | N |
| ATOM | 886 | CA  | ILE | D | 41 | -13.266 | 9.487   | -7.596  | 1.00 | 0.00 | C |
| ATOM | 887 | C   | ILE | D | 41 | -14.748 | 9.856   | -7.625  | 1.00 | 0.00 | C |
| ATOM | 888 | O   | ILE | D | 41 | -15.602 | 9.297   | -6.945  | 1.00 | 0.00 | O |
| ATOM | 889 | CB  | ILE | D | 41 | -12.976 | 8.750   | -8.907  | 1.00 | 0.00 | C |
| ATOM | 890 | CG1 | ILE | D | 41 | -13.766 | 7.470   | -9.162  | 1.00 | 0.00 | C |
| ATOM | 891 | CG2 | ILE | D | 41 | -11.486 | 8.425   | -9.025  | 1.00 | 0.00 | C |
| ATOM | 892 | CD  | ILE | D | 41 | -14.153 | 7.431   | -10.643 | 1.00 | 0.00 | C |
| ATOM | 893 | H   | ILE | D | 41 | -13.403 | 7.717   | -6.474  | 1.00 | 0.00 | H |
| ATOM | 894 | N   | ALA | D | 42 | -14.972 | 10.949  | -8.354  | 1.00 | 0.00 | N |
| ATOM | 895 | CA  | ALA | D | 42 | -16.312 | 11.525  | -8.566  | 1.00 | 0.00 | C |
| ATOM | 896 | C   | ALA | D | 42 | -16.271 | 12.271  | -9.896  | 1.00 | 0.00 | C |
| ATOM | 897 | CB  | ALA | D | 42 | -16.743 | 12.432  | -7.420  | 1.00 | 0.00 | C |
| ATOM | 898 | O1  | ALA | D | 42 | -15.487 | 13.238  | -10.009 | 1.00 | 0.00 | O |
| ATOM | 899 | O2  | ALA | D | 42 | -16.961 | 11.873  | -10.861 | 1.00 | 0.00 | O |
| ATOM | 900 | H   | ALA | D | 42 | -14.271 | 11.406  | -8.899  | 1.00 | 0.00 | H |
| ATOM | 901 | N   | LEU | E | 17 | -13.196 | -14.492 | -9.448  | 1.00 | 0.00 | N |
| ATOM | 902 | CA  | LEU | E | 17 | -11.750 | -14.693 | -9.270  | 1.00 | 0.00 | C |
| ATOM | 903 | C   | LEU | E | 17 | -11.184 | -13.302 | -8.940  | 1.00 | 0.00 | C |
| ATOM | 904 | O   | LEU | E | 17 | -11.792 | -12.316 | -9.332  | 1.00 | 0.00 | O |
| ATOM | 905 | CB  | LEU | E | 17 | -11.042 | -15.334 | -10.460 | 1.00 | 0.00 | C |
| ATOM | 906 | CG  | LEU | E | 17 | -11.309 | -16.837 | -10.482 | 1.00 | 0.00 | C |
| ATOM | 907 | CD1 | LEU | E | 17 | -10.778 | -17.463 | -11.777 | 1.00 | 0.00 | C |

|      |     |     |     |   |    |         |         |         |      |      |     |
|------|-----|-----|-----|---|----|---------|---------|---------|------|------|-----|
| ATOM | 908 | CD2 | LEU | E | 17 | -10.604 | -17.676 | -9.408  | 1.00 | 0.00 | C   |
| ATOM | 909 | H1  | LEU | E | 17 | -13.440 | -14.741 | -10.381 | 1.00 | 0.00 | H   |
| ATOM | 910 | H2  | LEU | E | 17 | -13.715 | -14.968 | -8.737  | 1.00 | 0.00 | H   |
| ATOM | 911 | H3  | LEU | E | 17 | -13.448 | -13.532 | -9.350  | 1.00 | 0.00 | H   |
| ATOM | 912 | N   | VAL | E | 18 | -10.052 | -13.278 | -8.242  | 1.00 | 0.00 | N   |
| ATOM | 913 | CA  | VAL | E | 18 | -9.368  | -12.006 | -7.968  | 1.00 | 0.00 | C   |
| ATOM | 914 | C   | VAL | E | 18 | -8.790  | -11.278 | -9.191  | 1.00 | 0.00 | C   |
| ATOM | 915 | O   | VAL | E | 18 | -8.469  | -11.919 | -10.187 | 1.00 | 0.00 | O   |
| ATOM | 916 | CB  | VAL | E | 18 | -8.290  | -12.392 | -6.950  | 1.00 | 0.00 | C   |
| ATOM | 917 | CG1 | VAL | E | 18 | -7.134  | -13.207 | -7.532  | 1.00 | 0.00 | C   |
| ATOM | 918 | CG2 | VAL | E | 18 | -7.880  | -11.157 | -6.141  | 1.00 | 0.00 | C   |
| ATOM | 919 | H   | VAL | E | 18 | -9.537  | -14.093 | -7.986  | 1.00 | 0.00 | H   |
| ATOM | 920 | N   | PHE | E | 19 | -8.945  | -9.965  | -9.072  | 1.00 | 0.00 | N   |
| ATOM | 921 | CA  | PHE | E | 19 | -8.307  | -8.994  | -9.975  | 1.00 | 0.00 | C   |
| ATOM | 922 | C   | PHE | E | 19 | -6.930  | -8.694  | -9.374  | 1.00 | 0.00 | C   |
| ATOM | 923 | O   | PHE | E | 19 | -6.732  | -8.177  | -8.278  | 1.00 | 0.00 | O   |
| ATOM | 924 | CB  | PHE | E | 19 | -9.238  | -7.784  | -9.960  | 1.00 | 0.00 | C   |
| ATOM | 925 | CG  | PHE | E | 19 | -8.961  | -6.769  | -11.072 | 1.00 | 0.00 | C   |
| ATOM | 926 | CD1 | PHE | E | 19 | -9.797  | -6.680  | -12.174 | 1.00 | 0.00 | C   |
| ATOM | 927 | CD2 | PHE | E | 19 | -7.903  | -5.881  | -10.911 | 1.00 | 0.00 | C   |
| ATOM | 928 | CE1 | PHE | E | 19 | -9.617  | -5.812  | -13.240 | 1.00 | 0.00 | C   |
| ATOM | 929 | CE2 | PHE | E | 19 | -7.671  | -5.084  | -12.024 | 1.00 | 0.00 | C   |
| ATOM | 930 | CZ  | PHE | E | 19 | -8.471  | -5.019  | -13.157 | 1.00 | 0.00 | C   |
| ATOM | 931 | H   | PHE | E | 19 | -9.526  | -9.555  | -8.370  | 1.00 | 0.00 | H   |
| ATOM | 932 | HD1 | PHE | E | 19 | -10.643 | -7.369  | -12.226 | 1.00 | 0.00 | H   |
| ATOM | 933 | HD2 | PHE | E | 19 | -7.287  | -5.685  | -10.032 | 1.00 | 0.00 | H   |
| ATOM | 934 | HE1 | PHE | E | 19 | -10.135 | -5.947  | -14.197 | 1.00 | 0.00 | H   |
| ATOM | 935 | HE2 | PHE | E | 19 | -6.724  | -4.566  | -12.139 | 1.00 | 0.00 | H   |
| ATOM | 936 | HZ  | PHE | E | 19 | -8.337  | -4.202  | -13.868 | 1.00 | 0.00 | H   |
| ATOM | 937 | N   | PHE | E | 20 | -6.002  | -8.582  | -10.322 | 1.00 | 0.00 | N   |
| ATOM | 938 | CA  | PHE | E | 20 | -4.568  | -8.361  | -10.061 | 1.00 | 0.00 | C   |
| ATOM | 939 | C   | PHE | E | 20 | -4.068  | -7.056  | -10.680 | 1.00 | 0.00 | C   |
| ATOM | 940 | O   | PHE | E | 20 | -4.615  | -6.468  | -11.606 | 1.00 | 0.00 | O   |
| ATOM | 941 | CB  | PHE | E | 20 | -3.827  | -9.542  | -10.698 | 1.00 | 0.00 | C   |
| ATOM | 942 | CG  | PHE | E | 20 | -2.549  | -9.927  | -9.944  | 1.00 | 0.00 | C   |
| ATOM | 943 | CD1 | PHE | E | 20 | -1.350  | -9.656  | -10.582 | 1.00 | 0.00 | C   |
| ATOM | 944 | CD2 | PHE | E | 20 | -2.572  | -10.772 | -8.840  | 1.00 | 0.00 | C   |
| ATOM | 945 | CE1 | PHE | E | 20 | -0.143  | -10.125 | -10.060 | 1.00 | 0.00 | C   |
| ATOM | 946 | CE2 | PHE | E | 20 | -1.363  | -11.184 | -8.307  | 1.00 | 0.00 | C   |
| ATOM | 947 | CZ  | PHE | E | 20 | -0.138  | -10.861 | -8.878  | 1.00 | 0.00 | C   |
| ATOM | 948 | H   | PHE | E | 20 | -6.257  | -8.258  | -11.232 | 1.00 | 0.00 | H   |
| ATOM | 949 | HD1 | PHE | E | 20 | -1.335  | -9.119  | -11.534 | 1.00 | 0.00 | H   |
| ATOM | 950 | HD2 | PHE | E | 20 | -3.482  | -10.948 | -8.272  | 1.00 | 0.00 | H   |
| ATOM | 951 | HE1 | PHE | E | 20 | 0.791   | -9.759  | -10.486 | 1.00 | 0.00 | H   |
| ATOM | 952 | HE2 | PHE | E | 20 | -1.363  | -12.004 | -7.583  | 1.00 | 0.00 | H   |
| ATOM | 953 | HZ  | PHE | E | 20 | 0.821   | -11.038 | -8.405  | 1.00 | 0.00 | H   |
| ATOM | 954 | N   | ALA | E | 21 | -2.975  | -6.587  | -10.079 | 1.00 | 0.00 | N   |
| ATOM | 955 | CA  | ALA | E | 21 | -2.225  | -5.403  | -10.500 | 1.00 | 0.00 | C   |
| ATOM | 956 | C   | ALA | E | 21 | -0.709  | -5.518  | -10.341 | 1.00 | 0.00 | C   |
| ATOM | 957 | O   | ALA | E | 21 | -0.081  | -5.206  | -9.329  | 1.00 | 0.00 | O   |
| ATOM | 958 | CB  | ALA | E | 21 | -2.943  | -4.174  | -9.922  | 1.00 | 0.00 | C   |
| ATOM | 959 | H   | ALA | E | 21 | -2.583  | -7.049  | -9.283  | 1.00 | 0.00 | H   |
| ATOM | 960 | N   | GLU | E | 22 | -0.172  | -6.230  | -11.317 | 1.00 | 0.00 | N   |
| ATOM | 961 | CA  | GLU | E | 22 | 1.271   | -6.342  | -11.573 | 1.00 | 0.00 | C   |
| ATOM | 962 | C   | GLU | E | 22 | 1.729   | -4.993  | -12.138 | 1.00 | 0.00 | C   |
| ATOM | 963 | O   | GLU | E | 22 | 2.009   | -4.843  | -13.327 | 1.00 | 0.00 | O   |
| ATOM | 964 | CB  | GLU | E | 22 | 1.546   | -7.535  | -12.503 | 1.00 | 0.00 | C   |
| ATOM | 965 | CG  | GLU | E | 22 | 3.017   | -7.666  | -12.872 | 1.00 | 0.00 | C   |
| ATOM | 966 | CD  | GLU | E | 22 | 3.242   | -8.866  | -13.798 | 1.00 | 0.00 | C   |
| ATOM | 967 | OE1 | GLU | E | 22 | 2.600   | -9.016  | -14.856 | 1.00 | 0.00 | O   |
| ATOM | 968 | OE2 | GLU | E | 22 | 4.097   | -9.673  | -13.379 | 1.00 | 0.00 | O1- |
| ATOM | 969 | H   | GLU | E | 22 | -0.823  | -6.456  | -12.050 | 1.00 | 0.00 | H   |
| ATOM | 970 | N   | ASP | E | 23 | 1.912   | -4.054  | -11.217 | 1.00 | 0.00 | N   |
| ATOM | 971 | CA  | ASP | E | 23 | 2.320   | -2.658  | -11.476 | 1.00 | 0.00 | C   |
| ATOM | 972 | C   | ASP | E | 23 | 3.798   | -2.466  | -11.820 | 1.00 | 0.00 | C   |
| ATOM | 973 | O   | ASP | E | 23 | 4.601   | -2.254  | -10.911 | 1.00 | 0.00 | O   |
| ATOM | 974 | CB  | ASP | E | 23 | 1.807   | -1.723  | -10.378 | 1.00 | 0.00 | C   |
| ATOM | 975 | CG  | ASP | E | 23 | 1.315   | -0.368  | -10.881 | 1.00 | 0.00 | C   |

|      |      |      |     |   |    |        |        |         |      |      |     |
|------|------|------|-----|---|----|--------|--------|---------|------|------|-----|
| ATOM | 976  | OD1  | ASP | E | 23 | 2.003  | 0.640  | -10.664 | 1.00 | 0.00 | O   |
| ATOM | 977  | OD2  | ASP | E | 23 | 0.341  | -0.365 | -11.664 | 1.00 | 0.00 | O1- |
| ATOM | 978  | H    | ASP | E | 23 | 1.841  | -4.306 | -10.255 | 1.00 | 0.00 | H   |
| ATOM | 979  | N    | VAL | E | 24 | 4.094  | -2.246 | -13.096 | 1.00 | 0.00 | N   |
| ATOM | 980  | CA   | VAL | E | 24 | 5.414  | -2.076 | -13.729 | 1.00 | 0.00 | C   |
| ATOM | 981  | C    | VAL | E | 24 | 5.805  | -0.598 | -13.721 | 1.00 | 0.00 | C   |
| ATOM | 982  | O    | VAL | E | 24 | 4.992  | 0.282  | -14.026 | 1.00 | 0.00 | O   |
| ATOM | 983  | CB   | VAL | E | 24 | 5.323  | -2.586 | -15.167 | 1.00 | 0.00 | C   |
| ATOM | 984  | CG1  | VAL | E | 24 | 6.612  | -2.352 | -15.956 | 1.00 | 0.00 | C   |
| ATOM | 985  | CG2  | VAL | E | 24 | 5.037  | -4.088 | -15.257 | 1.00 | 0.00 | C   |
| ATOM | 986  | H    | VAL | E | 24 | 3.394  | -1.837 | -13.691 | 1.00 | 0.00 | H   |
| ATOM | 987  | N    | GLY | E | 25 | 7.029  | -0.307 | -13.295 | 1.00 | 0.00 | N   |
| ATOM | 988  | CA   | GLY | E | 25 | 7.563  | 1.050  | -13.091 | 1.00 | 0.00 | C   |
| ATOM | 989  | C    | GLY | E | 25 | 8.947  | 1.054  | -12.434 | 1.00 | 0.00 | C   |
| ATOM | 990  | O    | GLY | E | 25 | 9.036  | 0.923  | -11.214 | 1.00 | 0.00 | O   |
| ATOM | 991  | H    | GLY | E | 25 | 7.586  | -1.066 | -12.967 | 1.00 | 0.00 | H   |
| ATOM | 992  | N    | SER | E | 26 | 9.985  | 1.182  | -13.247 | 1.00 | 0.00 | N   |
| ATOM | 993  | CA   | SER | E | 26 | 11.391 | 1.211  | -12.815 | 1.00 | 0.00 | C   |
| ATOM | 994  | C    | SER | E | 26 | 11.658 | 2.580  | -12.192 | 1.00 | 0.00 | C   |
| ATOM | 995  | O    | SER | E | 26 | 10.970 | 3.552  | -12.499 | 1.00 | 0.00 | O   |
| ATOM | 996  | CB   | SER | E | 26 | 12.252 | 0.996  | -14.062 | 1.00 | 0.00 | C   |
| ATOM | 997  | OG   | SER | E | 26 | 13.650 | 1.026  | -13.741 | 1.00 | 0.00 | O   |
| ATOM | 998  | H    | SER | E | 26 | 9.885  | 1.121  | -14.239 | 1.00 | 0.00 | H   |
| ATOM | 999  | HG   | SER | E | 26 | 14.123 | 1.182  | -14.611 | 1.00 | 0.00 | H   |
| ATOM | 1000 | N    | ASN | E | 27 | 12.470 | 2.532  | -11.134 | 1.00 | 0.00 | N   |
| ATOM | 1001 | CA   | ASN | E | 27 | 12.726 | 3.735  | -10.334 | 1.00 | 0.00 | C   |
| ATOM | 1002 | C    | ASN | E | 27 | 11.566 | 4.412  | -9.608  | 1.00 | 0.00 | C   |
| ATOM | 1003 | O    | ASN | E | 27 | 11.246 | 5.546  | -9.934  | 1.00 | 0.00 | O   |
| ATOM | 1004 | CB   | ASN | E | 27 | 13.497 | 4.770  | -11.159 | 1.00 | 0.00 | C   |
| ATOM | 1005 | CG   | ASN | E | 27 | 14.987 | 4.432  | -11.287 | 1.00 | 0.00 | C   |
| ATOM | 1006 | ND2  | ASN | E | 27 | 15.556 | 4.749  | -12.442 | 1.00 | 0.00 | N   |
| ATOM | 1007 | OD1  | ASN | E | 27 | 15.604 | 4.284  | -10.238 | 1.00 | 0.00 | O   |
| ATOM | 1008 | H    | ASN | E | 27 | 12.997 | 1.721  | -10.882 | 1.00 | 0.00 | H   |
| ATOM | 1009 | 1HD2 | ASN | E | 27 | 15.015 | 5.125  | -13.207 | 1.00 | 0.00 | H   |
| ATOM | 1010 | 2HD2 | ASN | E | 27 | 16.526 | 4.956  | -12.548 | 1.00 | 0.00 | H   |
| ATOM | 1011 | N    | LYS | E | 28 | 10.930 | 3.723  | -8.659  | 1.00 | 0.00 | N   |
| ATOM | 1012 | CA   | LYS | E | 28 | 9.825  | 4.213  | -7.816  | 1.00 | 0.00 | C   |
| ATOM | 1013 | C    | LYS | E | 28 | 10.175 | 4.734  | -6.420  | 1.00 | 0.00 | C   |
| ATOM | 1014 | O    | LYS | E | 28 | 9.339  | 4.644  | -5.529  | 1.00 | 0.00 | O   |
| ATOM | 1015 | CB   | LYS | E | 28 | 8.817  | 3.071  | -7.622  | 1.00 | 0.00 | C   |
| ATOM | 1016 | CG   | LYS | E | 28 | 8.076  | 2.792  | -8.923  | 1.00 | 0.00 | C   |
| ATOM | 1017 | CD   | LYS | E | 28 | 7.005  | 1.717  | -8.668  | 1.00 | 0.00 | C   |
| ATOM | 1018 | CE   | LYS | E | 28 | 6.011  | 1.543  | -9.813  | 1.00 | 0.00 | C   |
| ATOM | 1019 | NZ   | LYS | E | 28 | 4.859  | 0.660  | -9.573  | 1.00 | 0.00 | N1+ |
| ATOM | 1020 | H    | LYS | E | 28 | 11.258 | 2.817  | -8.403  | 1.00 | 0.00 | H   |
| ATOM | 1021 | HZ1  | LYS | E | 28 | 5.336  | -0.214 | -9.485  | 1.00 | 0.00 | H   |
| ATOM | 1022 | HZ2  | LYS | E | 28 | 4.304  | 0.961  | -8.807  | 1.00 | 0.00 | H   |
| ATOM | 1023 | HZ3  | LYS | E | 28 | 4.329  | 0.674  | -10.421 | 1.00 | 0.00 | H   |
| ATOM | 1024 | N    | GLY | E | 29 | 11.330 | 5.383  | -6.259  | 1.00 | 0.00 | N   |
| ATOM | 1025 | CA   | GLY | E | 29 | 11.707 | 6.149  | -5.064  | 1.00 | 0.00 | C   |
| ATOM | 1026 | C    | GLY | E | 29 | 11.060 | 7.535  | -4.970  | 1.00 | 0.00 | C   |
| ATOM | 1027 | O    | GLY | E | 29 | 11.882 | 8.450  | -4.970  | 1.00 | 0.00 | O   |
| ATOM | 1028 | H    | GLY | E | 29 | 12.109 | 5.091  | -6.818  | 1.00 | 0.00 | H   |
| ATOM | 1029 | N    | ALA | E | 30 | 9.742  | 7.675  | -4.833  | 1.00 | 0.00 | N   |
| ATOM | 1030 | CA   | ALA | E | 30 | 8.952  | 8.895  | -5.013  | 1.00 | 0.00 | C   |
| ATOM | 1031 | C    | ALA | E | 30 | 9.148  | 9.891  | -3.877  | 1.00 | 0.00 | C   |
| ATOM | 1032 | O    | ALA | E | 30 | 9.036  | 9.494  | -2.719  | 1.00 | 0.00 | O   |
| ATOM | 1033 | CB   | ALA | E | 30 | 7.507  | 8.402  | -4.964  | 1.00 | 0.00 | C   |
| ATOM | 1034 | H    | ALA | E | 30 | 9.234  | 6.965  | -4.347  | 1.00 | 0.00 | H   |
| ATOM | 1035 | N    | ILE | E | 31 | 8.778  | 11.131 | -4.219  | 1.00 | 0.00 | N   |
| ATOM | 1036 | CA   | ILE | E | 31 | 8.639  | 12.241 | -3.266  | 1.00 | 0.00 | C   |
| ATOM | 1037 | C    | ILE | E | 31 | 7.253  | 12.237 | -2.623  | 1.00 | 0.00 | C   |
| ATOM | 1038 | O    | ILE | E | 31 | 7.195  | 11.796 | -1.480  | 1.00 | 0.00 | O   |
| ATOM | 1039 | CB   | ILE | E | 31 | 8.961  | 13.566 | -3.959  | 1.00 | 0.00 | C   |
| ATOM | 1040 | CG1  | ILE | E | 31 | 10.121 | 13.566 | -4.955  | 1.00 | 0.00 | C   |
| ATOM | 1041 | CG2  | ILE | E | 31 | 9.095  | 14.696 | -2.938  | 1.00 | 0.00 | C   |
| ATOM | 1042 | CD   | ILE | E | 31 | 11.507 | 13.158 | -4.440  | 1.00 | 0.00 | C   |
| ATOM | 1043 | H    | ILE | E | 31 | 8.699  | 11.338 | -5.191  | 1.00 | 0.00 | H   |

|      |      |     |     |   |    |         |        |         |      |      |   |
|------|------|-----|-----|---|----|---------|--------|---------|------|------|---|
| ATOM | 1044 | N   | ILE | E | 32 | 6.163   | 12.404 | -3.360  | 1.00 | 0.00 | N |
| ATOM | 1045 | CA  | ILE | E | 32 | 4.756   | 12.226 | -2.963  | 1.00 | 0.00 | C |
| ATOM | 1046 | C   | ILE | E | 32 | 4.359   | 10.775 | -2.719  | 1.00 | 0.00 | C |
| ATOM | 1047 | O   | ILE | E | 32 | 5.098   | 9.836  | -3.038  | 1.00 | 0.00 | O |
| ATOM | 1048 | CB  | ILE | E | 32 | 3.830   | 12.935 | -3.956  | 1.00 | 0.00 | C |
| ATOM | 1049 | CG1 | ILE | E | 32 | 4.169   | 12.566 | -5.400  | 1.00 | 0.00 | C |
| ATOM | 1050 | CG2 | ILE | E | 32 | 3.748   | 14.422 | -3.616  | 1.00 | 0.00 | C |
| ATOM | 1051 | CD  | ILE | E | 32 | 3.003   | 12.957 | -6.320  | 1.00 | 0.00 | C |
| ATOM | 1052 | H   | ILE | E | 32 | 6.279   | 13.025 | -4.141  | 1.00 | 0.00 | H |
| ATOM | 1053 | N   | GLY | E | 33 | 3.172   | 10.580 | -2.156  | 1.00 | 0.00 | N |
| ATOM | 1054 | CA  | GLY | E | 33 | 2.738   | 9.208  | -1.827  | 1.00 | 0.00 | C |
| ATOM | 1055 | C   | GLY | E | 33 | 2.526   | 8.302  | -3.040  | 1.00 | 0.00 | C |
| ATOM | 1056 | O   | GLY | E | 33 | 1.640   | 8.623  | -3.843  | 1.00 | 0.00 | O |
| ATOM | 1057 | H   | GLY | E | 33 | 2.703   | 11.284 | -1.625  | 1.00 | 0.00 | H |
| ATOM | 1058 | N   | LEU | E | 34 | 3.172   | 7.145  | -3.067  | 1.00 | 0.00 | N |
| ATOM | 1059 | CA  | LEU | E | 34 | 3.151   | 6.223  | -4.210  | 1.00 | 0.00 | C |
| ATOM | 1060 | C   | LEU | E | 34 | 2.009   | 5.224  | -4.027  | 1.00 | 0.00 | C |
| ATOM | 1061 | O   | LEU | E | 34 | 1.933   | 4.583  | -2.987  | 1.00 | 0.00 | O |
| ATOM | 1062 | CB  | LEU | E | 34 | 4.505   | 5.504  | -4.150  | 1.00 | 0.00 | C |
| ATOM | 1063 | CG  | LEU | E | 34 | 4.651   | 4.689  | -5.432  | 1.00 | 0.00 | C |
| ATOM | 1064 | CD1 | LEU | E | 34 | 4.981   | 5.441  | -6.729  | 1.00 | 0.00 | C |
| ATOM | 1065 | CD2 | LEU | E | 34 | 5.635   | 3.543  | -5.191  | 1.00 | 0.00 | C |
| ATOM | 1066 | H   | LEU | E | 34 | 3.522   | 6.748  | -2.216  | 1.00 | 0.00 | H |
| ATOM | 1067 | N   | MET | E | 35 | 0.929   | 5.525  | -4.754  | 1.00 | 0.00 | N |
| ATOM | 1068 | CA  | MET | E | 35 | -0.377  | 4.862  | -4.789  | 1.00 | 0.00 | C |
| ATOM | 1069 | C   | MET | E | 35 | -0.249  | 3.542  | -5.555  | 1.00 | 0.00 | C |
| ATOM | 1070 | O   | MET | E | 35 | 0.437   | 3.444  | -6.573  | 1.00 | 0.00 | O |
| ATOM | 1071 | CB  | MET | E | 35 | -1.461  | 5.607  | -5.571  | 1.00 | 0.00 | C |
| ATOM | 1072 | CG  | MET | E | 35 | -2.840  | 5.302  | -4.986  | 1.00 | 0.00 | C |
| ATOM | 1073 | SD  | MET | E | 35 | -3.094  | 6.427  | -3.563  | 1.00 | 0.00 | S |
| ATOM | 1074 | CE  | MET | E | 35 | -4.105  | 5.241  | -2.714  | 1.00 | 0.00 | C |
| ATOM | 1075 | H   | MET | E | 35 | 0.991   | 6.386  | -5.267  | 1.00 | 0.00 | H |
| ATOM | 1076 | N   | VAL | E | 36 | -0.533  | 2.506  | -4.785  | 1.00 | 0.00 | N |
| ATOM | 1077 | CA  | VAL | E | 36 | -0.598  | 1.099  | -5.217  | 1.00 | 0.00 | C |
| ATOM | 1078 | C   | VAL | E | 36 | -2.024  | 0.559  | -5.174  | 1.00 | 0.00 | C |
| ATOM | 1079 | O   | VAL | E | 36 | -2.575  | 0.143  | -4.161  | 1.00 | 0.00 | O |
| ATOM | 1080 | CB  | VAL | E | 36 | 0.279   | 0.272  | -4.274  | 1.00 | 0.00 | C |
| ATOM | 1081 | CG1 | VAL | E | 36 | 0.237   | -1.240 | -4.537  | 1.00 | 0.00 | C |
| ATOM | 1082 | CG2 | VAL | E | 36 | 1.723   | 0.761  | -4.115  | 1.00 | 0.00 | C |
| ATOM | 1083 | H   | VAL | E | 36 | -0.781  | 2.663  | -3.828  | 1.00 | 0.00 | H |
| ATOM | 1084 | N   | GLY | E | 37 | -2.656  | 0.642  | -6.344  | 1.00 | 0.00 | N |
| ATOM | 1085 | CA  | GLY | E | 37 | -4.065  | 0.276  | -6.553  | 1.00 | 0.00 | C |
| ATOM | 1086 | C   | GLY | E | 37 | -4.806  | 1.104  | -7.607  | 1.00 | 0.00 | C |
| ATOM | 1087 | O   | GLY | E | 37 | -5.098  | 0.584  | -8.687  | 1.00 | 0.00 | O |
| ATOM | 1088 | H   | GLY | E | 37 | -2.191  | 0.803  | -7.212  | 1.00 | 0.00 | H |
| ATOM | 1089 | N   | GLY | E | 38 | -5.323  | 2.272  | -7.243  | 1.00 | 0.00 | N |
| ATOM | 1090 | CA  | GLY | E | 38 | -5.972  | 3.166  | -8.197  | 1.00 | 0.00 | C |
| ATOM | 1091 | C   | GLY | E | 38 | -7.339  | 3.738  | -7.799  | 1.00 | 0.00 | C |
| ATOM | 1092 | O   | GLY | E | 38 | -7.727  | 3.783  | -6.637  | 1.00 | 0.00 | O |
| ATOM | 1093 | H   | GLY | E | 38 | -5.376  | 2.552  | -6.277  | 1.00 | 0.00 | H |
| ATOM | 1094 | N   | VAL | E | 39 | -8.121  | 4.098  | -8.818  | 1.00 | 0.00 | N |
| ATOM | 1095 | CA  | VAL | E | 39 | -9.526  | 4.489  | -8.713  | 1.00 | 0.00 | C |
| ATOM | 1096 | C   | VAL | E | 39 | -10.541 | 3.545  | -8.045  | 1.00 | 0.00 | C |
| ATOM | 1097 | O   | VAL | E | 39 | -10.355 | 2.333  | -8.140  | 1.00 | 0.00 | O |
| ATOM | 1098 | CB  | VAL | E | 39 | -9.975  | 4.874  | -10.118 | 1.00 | 0.00 | C |
| ATOM | 1099 | CG1 | VAL | E | 39 | -9.114  | 5.980  | -10.739 | 1.00 | 0.00 | C |
| ATOM | 1100 | CG2 | VAL | E | 39 | -10.056 | 3.769  | -11.174 | 1.00 | 0.00 | C |
| ATOM | 1101 | H   | VAL | E | 39 | -7.629  | 4.258  | -9.673  | 1.00 | 0.00 | H |
| ATOM | 1102 | N   | VAL | E | 40 | -11.495 | 4.169  | -7.368  | 1.00 | 0.00 | N |
| ATOM | 1103 | CA  | VAL | E | 40 | -12.648 | 3.462  | -6.793  | 1.00 | 0.00 | C |
| ATOM | 1104 | C   | VAL | E | 40 | -13.863 | 4.379  | -6.702  | 1.00 | 0.00 | C |
| ATOM | 1105 | O   | VAL | E | 40 | -13.717 | 5.549  | -6.328  | 1.00 | 0.00 | O |
| ATOM | 1106 | CB  | VAL | E | 40 | -12.258 | 2.847  | -5.448  | 1.00 | 0.00 | C |
| ATOM | 1107 | CG1 | VAL | E | 40 | -11.711 | 3.666  | -4.269  | 1.00 | 0.00 | C |
| ATOM | 1108 | CG2 | VAL | E | 40 | -13.295 | 1.895  | -4.837  | 1.00 | 0.00 | C |
| ATOM | 1109 | H   | VAL | E | 40 | -11.422 | 5.110  | -7.030  | 1.00 | 0.00 | H |
| ATOM | 1110 | N   | ILE | E | 41 | -15.025 | 3.748  | -6.840  | 1.00 | 0.00 | N |
| ATOM | 1111 | CA  | ILE | E | 41 | -16.277 | 4.512  | -6.928  | 1.00 | 0.00 | C |

|      |      |     |     |   |    |         |        |         |      |      |   |
|------|------|-----|-----|---|----|---------|--------|---------|------|------|---|
| ATOM | 1112 | C   | ILE | E | 41 | -17.171 | 4.595  | -5.685  | 1.00 | 0.00 | C |
| ATOM | 1113 | O   | ILE | E | 41 | -17.122 | 3.655  | -4.883  | 1.00 | 0.00 | O |
| ATOM | 1114 | CB  | ILE | E | 41 | -17.081 | 4.071  | -8.152  | 1.00 | 0.00 | C |
| ATOM | 1115 | CG1 | ILE | E | 41 | -17.245 | 2.553  | -8.204  | 1.00 | 0.00 | C |
| ATOM | 1116 | CG2 | ILE | E | 41 | -16.509 | 4.866  | -9.331  | 1.00 | 0.00 | C |
| ATOM | 1117 | CD  | ILE | E | 41 | -18.682 | 2.207  | -8.633  | 1.00 | 0.00 | C |
| ATOM | 1118 | H   | ILE | E | 41 | -15.127 | 2.760  | -6.734  | 1.00 | 0.00 | H |
| ATOM | 1119 | N   | ALA | E | 42 | -17.877 | 5.689  | -5.444  | 1.00 | 0.00 | N |
| ATOM | 1120 | CA  | ALA | E | 42 | -18.636 | 5.894  | -4.196  | 1.00 | 0.00 | C |
| ATOM | 1121 | C   | ALA | E | 42 | -19.917 | 6.730  | -4.285  | 1.00 | 0.00 | C |
| ATOM | 1122 | CB  | ALA | E | 42 | -17.729 | 6.562  | -3.163  | 1.00 | 0.00 | C |
| ATOM | 1123 | O1  | ALA | E | 42 | -19.838 | 7.694  | -5.071  | 1.00 | 0.00 | O |
| ATOM | 1124 | O2  | ALA | E | 42 | -20.954 | 6.585  | -3.597  | 1.00 | 0.00 | O |
| ATOM | 1125 | H   | ALA | E | 42 | -17.765 | 6.578  | -5.887  | 1.00 | 0.00 | H |
| ATOM | 1126 | C1  | 6n  | F | 43 | -13.676 | -1.755 | -8.856  | 1.00 | 0.00 | C |
| ATOM | 1127 | N1  | 6n  | F | 43 | -14.464 | 1.661  | -11.433 | 1.00 | 0.00 | N |
| ATOM | 1128 | O1  | 6n  | F | 43 | -15.597 | -3.134 | -9.445  | 1.00 | 0.00 | O |
| ATOM | 1129 | C2  | 6n  | F | 43 | -14.485 | -0.471 | -8.490  | 1.00 | 0.00 | C |
| ATOM | 1130 | N2  | 6n  | F | 43 | -13.598 | 2.363  | -10.648 | 1.00 | 0.00 | N |
| ATOM | 1131 | O2  | 6n  | F | 43 | -14.296 | -2.578 | -11.168 | 1.00 | 0.00 | O |
| ATOM | 1132 | C3  | 6n  | F | 43 | -14.283 | 0.615  | -9.475  | 1.00 | 0.00 | C |
| ATOM | 1133 | N3  | 6n  | F | 43 | -13.423 | 1.738  | -9.565  | 1.00 | 0.00 | N |
| ATOM | 1134 | O3  | 6n  | F | 43 | -10.532 | -1.548 | -10.464 | 1.00 | 0.00 | O |
| ATOM | 1135 | C4  | 6n  | F | 43 | -14.972 | 0.571  | -10.704 | 1.00 | 0.00 | C |
| ATOM | 1136 | N4  | 6n  | F | 43 | -11.328 | -1.020 | -5.185  | 1.00 | 0.00 | N |
| ATOM | 1137 | C5  | 6n  | F | 43 | -14.541 | 1.666  | -12.846 | 1.00 | 0.00 | C |
| ATOM | 1138 | N5  | 6n  | F | 43 | -11.703 | -2.150 | -4.537  | 1.00 | 0.00 | N |
| ATOM | 1139 | C6  | 6n  | F | 43 | -14.776 | 0.466  | -13.538 | 1.00 | 0.00 | C |
| ATOM | 1140 | N6  | 6n  | F | 43 | -12.690 | -2.687 | -5.128  | 1.00 | 0.00 | N |
| ATOM | 1141 | C7  | 6n  | F | 43 | -14.912 | 0.439  | -14.924 | 1.00 | 0.00 | C |
| ATOM | 1142 | N7  | 6n  | F | 43 | -12.409 | -1.475 | -9.482  | 1.00 | 0.00 | N |
| ATOM | 1143 | C8  | 6n  | F | 43 | -14.818 | 1.594  | -15.680 | 1.00 | 0.00 | C |
| ATOM | 1144 | C9  | 6n  | F | 43 | -14.704 | 2.765  | -14.933 | 1.00 | 0.00 | C |
| ATOM | 1145 | C10 | 6n  | F | 43 | -14.611 | 2.885  | -13.554 | 1.00 | 0.00 | C |
| ATOM | 1146 | C11 | 6n  | F | 43 | -14.523 | 4.317  | -13.014 | 1.00 | 0.00 | C |
| ATOM | 1147 | C12 | 6n  | F | 43 | -14.563 | -2.576 | -9.834  | 1.00 | 0.00 | C |
| ATOM | 1148 | C13 | 6n  | F | 43 | -15.041 | -3.421 | -12.073 | 1.00 | 0.00 | C |
| ATOM | 1149 | C14 | 6n  | F | 43 | -14.506 | -3.317 | -13.481 | 1.00 | 0.00 | C |
| ATOM | 1150 | C15 | 6n  | F | 43 | -13.643 | -2.590 | -7.538  | 1.00 | 0.00 | C |
| ATOM | 1151 | C16 | 6n  | F | 43 | -12.914 | -2.060 | -6.384  | 1.00 | 0.00 | C |
| ATOM | 1152 | C17 | 6n  | F | 43 | -12.068 | -0.927 | -6.377  | 1.00 | 0.00 | C |
| ATOM | 1153 | C18 | 6n  | F | 43 | -10.011 | -0.492 | -5.083  | 1.00 | 0.00 | C |
| ATOM | 1154 | C19 | 6n  | F | 43 | -9.386  | -0.758 | -3.851  | 1.00 | 0.00 | C |
| ATOM | 1155 | C20 | 6n  | F | 43 | -7.999  | -0.843 | -3.904  | 1.00 | 0.00 | C |
| ATOM | 1156 | C21 | 6n  | F | 43 | -7.284  | -0.598 | -5.070  | 1.00 | 0.00 | C |
| ATOM | 1157 | C22 | 6n  | F | 43 | -7.909  | -0.234 | -6.259  | 1.00 | 0.00 | C |
| ATOM | 1158 | C23 | 6n  | F | 43 | -9.289  | -0.171 | -6.260  | 1.00 | 0.00 | C |
| ATOM | 1159 | C24 | 6n  | F | 43 | -10.036 | -0.438 | -2.507  | 1.00 | 0.00 | C |
| ATOM | 1160 | C25 | 6n  | F | 43 | -11.405 | -2.295 | -9.958  | 1.00 | 0.00 | C |
| ATOM | 1161 | C26 | 6n  | F | 43 | -11.158 | -3.756 | -9.710  | 1.00 | 0.00 | C |
| ATOM | 1162 | F1  | 6n  | F | 43 | -13.547 | 4.632  | -12.090 | 1.00 | 0.00 | F |
| ATOM | 1163 | F2  | 6n  | F | 43 | -14.362 | 5.486  | -13.736 | 1.00 | 0.00 | F |
| ATOM | 1164 | F3  | 6n  | F | 43 | -15.703 | 4.785  | -12.462 | 1.00 | 0.00 | F |
| ATOM | 1165 | F4  | 6n  | F | 43 | -9.198  | -0.089 | -1.471  | 1.00 | 0.00 | F |
| ATOM | 1166 | F5  | 6n  | F | 43 | -10.817 | 0.692  | -2.390  | 1.00 | 0.00 | F |
| ATOM | 1167 | F6  | 6n  | F | 43 | -10.806 | -1.410 | -1.888  | 1.00 | 0.00 | F |
| ATOM | 1168 | H1  | 6n  | F | 43 | -12.231 | -0.486 | -9.453  | 1.00 | 0.00 | H |
| ATOM | 1169 | H03 | 6n  | F | 43 | -15.600 | -0.136 | -11.244 | 1.00 | 0.00 | H |
| ATOM | 1170 | H04 | 6n  | F | 43 | -14.910 | -0.489 | -12.996 | 1.00 | 0.00 | H |
| ATOM | 1171 | H05 | 6n  | F | 43 | -15.241 | -0.487 | -15.429 | 1.00 | 0.00 | H |
| ATOM | 1172 | H06 | 6n  | F | 43 | -15.129 | 1.550  | -16.726 | 1.00 | 0.00 | H |
| ATOM | 1173 | H07 | 6n  | F | 43 | -14.247 | 3.639  | -15.433 | 1.00 | 0.00 | H |
| ATOM | 1174 | H11 | 6n  | F | 43 | -12.095 | -0.060 | -7.041  | 1.00 | 0.00 | H |
| ATOM | 1175 | H12 | 6n  | F | 43 | -7.448  | -1.064 | -2.973  | 1.00 | 0.00 | H |
| ATOM | 1176 | H13 | 6n  | F | 43 | -6.258  | -1.003 | -5.130  | 1.00 | 0.00 | H |
| ATOM | 1177 | H14 | 6n  | F | 43 | -7.327  | 0.019  | -7.158  | 1.00 | 0.00 | H |
| ATOM | 1178 | H15 | 6n  | F | 43 | -9.795  | 0.092  | -7.204  | 1.00 | 0.00 | H |
| END  |      |     |     |   |    |         |        |         |      |      |   |



## Reference

---

1. A. Kaur, S. Mann, A. Kaur, N. Priyadarshi, B. Goyal, N. K. Singhal and D. Goyal, *Bioorg. Chem.*, 2019, **87**, 572–584.
